# Supplementary material
Source: publisher site journal article supplement (https://www.spandidos-publications.com/367/downloadSupplementary)
Supplement: Supplementary file 1 [file downloadSupplementary]

## Sheet: Table SI
Table SI. . Results of LINC00668 Pearson correlation-related genes in genome-wide.
gene1	gene2	t	df	cor	ci0.95	p
LINC00668	LINC00668	Inf	368	1	1, 1	0
LINC00668	P2RY4	9.89	368	0.46	0.37, 0.54	1.3e-20
LINC00668	SPCS2	8.46	368	0.4	0.31, 0.49	6.54e-16
LINC00668	FAM86C1	8.04	368	0.39	0.3, 0.47	1.2e-14
LINC00668	TDRD5	7.97	368	0.38	0.29, 0.47	1.98e-14
LINC00668	FTL	7.9	368	0.38	0.29, 0.46	3.16e-14
LINC00668	SFN	7.74	368	0.37	0.28, 0.46	9.85e-14
LINC00668	NOC2L	7.53	368	0.37	0.27, 0.45	3.84e-13
LINC00668	PRDX1	7.39	368	0.36	0.27, 0.45	1.01e-12
LINC00668	CTAG2	7.33	368	0.36	0.26, 0.44	1.46e-12
LINC00668	LZIC	7.32	368	0.36	0.26, 0.44	1.54e-12
LINC00668	EXOSC10	7.26	368	0.35	0.26, 0.44	2.31e-12
LINC00668	CDCA8	7.19	368	0.35	0.26, 0.44	3.73e-12
LINC00668	AP002495.2	7.14	368	0.35	0.26, 0.44	5.07e-12
LINC00668	UTP6	7.12	368	0.35	0.26, 0.43	5.67e-12
LINC00668	NEIL3	7.1	368	0.35	0.25, 0.43	6.54e-12
LINC00668	FAM183A	7.08	368	0.35	0.25, 0.43	7.51e-12
LINC00668	TAF12	7.05	368	0.35	0.25, 0.43	8.79e-12
LINC00668	MAGEB2	7.04	368	0.34	0.25, 0.43	9.58e-12
LINC00668	TTK	6.99	368	0.34	0.25, 0.43	1.27e-11
LINC00668	OR8G5	6.91	368	0.34	0.25, 0.43	2.17e-11
LINC00668	DGAT2L6	6.86	368	0.34	0.24, 0.42	2.86e-11
LINC00668	MAGEA1	6.81	368	0.33	0.24, 0.42	3.87e-11
LINC00668	POF1B	6.78	368	0.33	0.24, 0.42	4.86e-11
LINC00668	RIPPLY2	6.7	368	0.33	0.24, 0.42	7.74e-11
LINC00668	HMMR	6.68	368	0.33	0.23, 0.42	8.77e-11
LINC00668	MRTO4	6.66	368	0.33	0.23, 0.42	9.81e-11
LINC00668	OIP5	6.62	368	0.33	0.23, 0.41	1.24e-10
LINC00668	MED8	6.61	368	0.33	0.23, 0.41	1.31e-10
LINC00668	C1orf174	6.58	368	0.32	0.23, 0.41	1.59e-10
LINC00668	RFPL4A	6.54	368	0.32	0.23, 0.41	2.11e-10
LINC00668	GTSF1	6.48	368	0.32	0.23, 0.41	2.93e-10
LINC00668	DDX43	6.48	368	0.32	0.23, 0.41	2.94e-10
LINC00668	NRAS	6.43	368	0.32	0.22, 0.41	4.02e-10
LINC00668	CDC20	6.43	368	0.32	0.22, 0.41	4.03e-10
LINC00668	PRAME	6.42	368	0.32	0.22, 0.41	4.21e-10
LINC00668	KIF2C	6.41	368	0.32	0.22, 0.41	4.36e-10
LINC00668	BUB1	6.38	368	0.32	0.22, 0.4	5.48e-10
LINC00668	AUNIP	6.37	368	0.32	0.22, 0.4	5.56e-10
LINC00668	RCC1	6.37	368	0.32	0.22, 0.4	5.57e-10
LINC00668	KPNA7	6.35	368	0.31	0.22, 0.4	6.24e-10
LINC00668	C17orf58	6.32	368	0.31	0.22, 0.4	7.4e-10
LINC00668	GLB1L3	6.32	368	0.31	0.22, 0.4	7.51e-10
LINC00668	CSTF2	6.3	368	0.31	0.22, 0.4	8.54e-10
LINC00668	MAGEC2	6.29	368	0.31	0.22, 0.4	9.1e-10
LINC00668	SULT1C3	6.28	368	0.31	0.22, 0.4	9.34e-10
LINC00668	ENO1	6.28	368	0.31	0.22, 0.4	9.5e-10
LINC00668	PRIM1	6.2	368	0.31	0.21, 0.4	1.5e-09
LINC00668	TRNAU1AP	6.19	368	0.31	0.21, 0.4	1.6e-09
LINC00668	DEPDC1	6.19	368	0.31	0.21, 0.4	1.63e-09
LINC00668	OR8A1	6.18	368	0.31	0.21, 0.4	1.69e-09
LINC00668	PRPF38A	6.16	368	0.31	0.21, 0.4	1.96e-09
LINC00668	HMX2	6.15	368	0.31	0.21, 0.4	1.99e-09
LINC00668	NFYC	6.14	368	0.3	0.21, 0.39	2.12e-09
LINC00668	NDC80	6.13	368	0.3	0.21, 0.39	2.25e-09
LINC00668	DKKL1	6.12	368	0.3	0.21, 0.39	2.46e-09
LINC00668	CDC42	6.11	368	0.3	0.21, 0.39	2.48e-09
LINC00668	HMGN2	6.08	368	0.3	0.21, 0.39	3.04e-09
LINC00668	SQSTM1	6.02	368	0.3	0.2, 0.39	4.2e-09
LINC00668	FAM133A	6.01	368	0.3	0.2, 0.39	4.38e-09
LINC00668	DHCR24	6.01	368	0.3	0.2, 0.39	4.55e-09
LINC00668	ELOA	5.96	368	0.3	0.2, 0.39	5.91e-09
LINC00668	SF3A3	5.95	368	0.3	0.2, 0.39	6.14e-09
LINC00668	PSMB2	5.92	368	0.29	0.2, 0.39	7.29e-09
LINC00668	TKT	5.92	368	0.29	0.2, 0.39	7.33e-09
LINC00668	NDC1	5.9	368	0.29	0.2, 0.38	8.38e-09
LINC00668	EIF3I	5.88	368	0.29	0.2, 0.38	9.01e-09
LINC00668	STMN1	5.87	368	0.29	0.2, 0.38	9.98e-09
LINC00668	RIOX2	5.84	368	0.29	0.2, 0.38	1.12e-08
LINC00668	DDOST	5.83	368	0.29	0.19, 0.38	1.24e-08
LINC00668	SSX1	5.8	368	0.29	0.19, 0.38	1.44e-08
LINC00668	ORC3	5.8	368	0.29	0.19, 0.38	1.44e-08
LINC00668	OOEP	5.77	368	0.29	0.19, 0.38	1.66e-08
LINC00668	NRDC	5.77	368	0.29	0.19, 0.38	1.7e-08
LINC00668	MAGEA3	5.74	368	0.29	0.19, 0.38	2e-08
LINC00668	CDC25C	5.74	368	0.29	0.19, 0.38	2.02e-08
LINC00668	SPDL1	5.72	368	0.29	0.19, 0.38	2.22e-08
LINC00668	FBXO6	5.7	368	0.28	0.19, 0.38	2.47e-08
LINC00668	GNGT1	5.7	368	0.28	0.19, 0.38	2.49e-08
LINC00668	AKR1B10	5.68	368	0.28	0.19, 0.38	2.71e-08
LINC00668	SERBP1	5.68	368	0.28	0.19, 0.38	2.73e-08
LINC00668	GPSM2	5.68	368	0.28	0.19, 0.37	2.75e-08
LINC00668	USP48	5.66	368	0.28	0.19, 0.37	3.07e-08
LINC00668	PLOD1	5.66	368	0.28	0.19, 0.37	3.08e-08
LINC00668	DPH2	5.63	368	0.28	0.19, 0.37	3.52e-08
LINC00668	G6PD	5.63	368	0.28	0.19, 0.37	3.54e-08
LINC00668	AC115220.1	5.63	368	0.28	0.19, 0.37	3.54e-08
LINC00668	GNB1	5.63	368	0.28	0.18, 0.37	3.64e-08
LINC00668	C12orf56	5.62	368	0.28	0.18, 0.37	3.7e-08
LINC00668	GNL2	5.6	368	0.28	0.18, 0.37	4.11e-08
LINC00668	AGO1	5.58	368	0.28	0.18, 0.37	4.67e-08
LINC00668	NCAPG	5.56	368	0.28	0.18, 0.37	5.07e-08
LINC00668	DDIAS	5.56	368	0.28	0.18, 0.37	5.17e-08
LINC00668	KDM1A	5.56	368	0.28	0.18, 0.37	5.25e-08
LINC00668	DNAJC8	5.55	368	0.28	0.18, 0.37	5.42e-08
LINC00668	GAGE1	5.53	368	0.28	0.18, 0.37	6.21e-08
LINC00668	CCNB1	5.52	368	0.28	0.18, 0.37	6.58e-08
LINC00668	ZNF681	5.49	368	0.27	0.18, 0.37	7.66e-08
LINC00668	SLC10A4	5.45	368	0.27	0.18, 0.37	9.03e-08
LINC00668	MAGEC1	5.45	368	0.27	0.18, 0.37	9.16e-08
LINC00668	DFFA	5.43	368	0.27	0.18, 0.36	1e-07
LINC00668	WASF2	5.43	368	0.27	0.18, 0.36	1.01e-07
LINC00668	CARD18	5.41	368	0.27	0.17, 0.36	1.12e-07
LINC00668	GPR158	5.4	368	0.27	0.17, 0.36	1.2e-07
LINC00668	RAD51	5.37	368	0.27	0.17, 0.36	1.38e-07
LINC00668	STIP1	5.36	368	0.27	0.17, 0.36	1.5e-07
LINC00668	ZDHHC18	5.32	368	0.27	0.17, 0.36	1.84e-07
LINC00668	FAM72B	5.32	368	0.27	0.17, 0.36	1.84e-07
LINC00668	PGD	5.29	368	0.27	0.17, 0.36	2.06e-07
LINC00668	FPGT	5.29	368	0.27	0.17, 0.36	2.08e-07
LINC00668	CCDC36	5.28	368	0.27	0.17, 0.36	2.17e-07
LINC00668	CT45A10	5.28	368	0.27	0.17, 0.36	2.2e-07
LINC00668	PTTG1	5.28	368	0.27	0.17, 0.36	2.27e-07
LINC00668	GALE	5.27	368	0.26	0.17, 0.36	2.32e-07
LINC00668	LIN28B	5.24	368	0.26	0.17, 0.36	2.77e-07
LINC00668	RFPL4B	5.23	368	0.26	0.17, 0.36	2.83e-07
LINC00668	CDKN2AIPNL	5.23	368	0.26	0.17, 0.36	2.84e-07
LINC00668	FBXO45	5.23	368	0.26	0.17, 0.36	2.89e-07
LINC00668	TUBA3C	5.23	368	0.26	0.17, 0.36	2.92e-07
LINC00668	TRAM1L1	5.22	368	0.26	0.16, 0.35	3.01e-07
LINC00668	TP53TG3D	5.21	368	0.26	0.16, 0.35	3.11e-07
LINC00668	EFHC2	5.21	368	0.26	0.16, 0.35	3.23e-07
LINC00668	EMC1	5.2	368	0.26	0.16, 0.35	3.25e-07
LINC00668	SSU72	5.19	368	0.26	0.16, 0.35	3.49e-07
LINC00668	PRMT6	5.18	368	0.26	0.16, 0.35	3.64e-07
LINC00668	ZNF257	5.15	368	0.26	0.16, 0.35	4.23e-07
LINC00668	FANCD2	5.15	368	0.26	0.16, 0.35	4.24e-07
LINC00668	MAGEA6	5.14	368	0.26	0.16, 0.35	4.45e-07
LINC00668	ZCCHC17	5.14	368	0.26	0.16, 0.35	4.46e-07
LINC00668	ZMYM1	5.13	368	0.26	0.16, 0.35	4.59e-07
LINC00668	SGO1	5.13	368	0.26	0.16, 0.35	4.7e-07
LINC00668	CELF4	5.13	368	0.26	0.16, 0.35	4.8e-07
LINC00668	UBE2J2	5.12	368	0.26	0.16, 0.35	4.91e-07
LINC00668	TYW3	5.12	368	0.26	0.16, 0.35	4.95e-07
LINC00668	INTS11	5.12	368	0.26	0.16, 0.35	4.96e-07
LINC00668	HOXA9	5.11	368	0.26	0.16, 0.35	5.27e-07
LINC00668	RINL	5.1	368	0.26	0.16, 0.35	5.53e-07
LINC00668	GPN2	5.09	368	0.26	0.16, 0.35	5.61e-07
LINC00668	SMPDL3B	5.07	368	0.26	0.16, 0.35	6.27e-07
LINC00668	GLMN	5.07	368	0.26	0.16, 0.35	6.29e-07
LINC00668	CDCA2	5.07	368	0.26	0.16, 0.35	6.46e-07
LINC00668	COL24A1	5.06	368	0.25	0.16, 0.35	6.79e-07
LINC00668	PSRC1	5.05	368	0.25	0.16, 0.35	6.99e-07
LINC00668	TUBB2A	5.05	368	0.25	0.16, 0.35	7.02e-07
LINC00668	SGO2	5.05	368	0.25	0.16, 0.35	7.1e-07
LINC00668	EXO1	5.04	368	0.25	0.16, 0.35	7.21e-07
LINC00668	UBE4B	5.04	368	0.25	0.16, 0.35	7.26e-07
LINC00668	BCAS2	5.04	368	0.25	0.16, 0.35	7.32e-07
LINC00668	GRK6	5.04	368	0.25	0.16, 0.35	7.36e-07
LINC00668	CT55	5.04	368	0.25	0.16, 0.35	7.39e-07
LINC00668	HSPB11	5.03	368	0.25	0.16, 0.35	7.63e-07
LINC00668	MAGEA12	5.03	368	0.25	0.16, 0.35	7.78e-07
LINC00668	MAD2L2	5.03	368	0.25	0.16, 0.35	7.84e-07
LINC00668	TIMMDC1	5.02	368	0.25	0.16, 0.35	7.9e-07
LINC00668	BUB1B	5	368	0.25	0.15, 0.35	8.73e-07
LINC00668	AC068775.1	5	368	0.25	0.15, 0.35	8.81e-07
LINC00668	ACTR6	5	368	0.25	0.15, 0.35	8.94e-07
LINC00668	CCNF	4.99	368	0.25	0.15, 0.34	9.32e-07
LINC00668	POPDC3	4.98	368	0.25	0.15, 0.34	9.95e-07
LINC00668	AKR1B15	4.97	368	0.25	0.15, 0.34	1e-06
LINC00668	FAM83D	4.97	368	0.25	0.15, 0.34	1e-06
LINC00668	KIF4A	4.97	368	0.25	0.15, 0.34	1.03e-06
LINC00668	TMEM132D	4.97	368	0.25	0.15, 0.34	1.03e-06
LINC00668	SPC25	4.97	368	0.25	0.15, 0.34	1.04e-06
LINC00668	TSPY2	4.96	368	0.25	0.15, 0.34	1.09e-06
LINC00668	EPB41	4.95	368	0.25	0.15, 0.34	1.11e-06
LINC00668	NUP37	4.95	368	0.25	0.15, 0.34	1.15e-06
LINC00668	ADSL	4.94	368	0.25	0.15, 0.34	1.19e-06
LINC00668	YBX1	4.93	368	0.25	0.15, 0.34	1.26e-06
LINC00668	MAP3K7	4.92	368	0.25	0.15, 0.34	1.28e-06
LINC00668	SYNCRIP	4.92	368	0.25	0.15, 0.34	1.32e-06
LINC00668	NAA11	4.92	368	0.25	0.15, 0.34	1.33e-06
LINC00668	USP13	4.91	368	0.25	0.15, 0.34	1.38e-06
LINC00668	ORC1	4.9	368	0.25	0.15, 0.34	1.41e-06
LINC00668	MTFR2	4.88	368	0.25	0.15, 0.34	1.58e-06
LINC00668	CCNJL	4.87	368	0.25	0.15, 0.34	1.64e-06
LINC00668	KATNA1	4.87	368	0.25	0.15, 0.34	1.64e-06
LINC00668	SFPQ	4.87	368	0.25	0.15, 0.34	1.66e-06
LINC00668	LYPLA2	4.87	368	0.25	0.15, 0.34	1.67e-06
LINC00668	CC2D1B	4.84	368	0.24	0.15, 0.34	1.91e-06
LINC00668	CKAP2L	4.82	368	0.24	0.15, 0.34	2.13e-06
LINC00668	NCAPH	4.82	368	0.24	0.15, 0.34	2.15e-06
LINC00668	TRIM6	4.79	368	0.24	0.14, 0.34	2.37e-06
LINC00668	CCNB2	4.79	368	0.24	0.14, 0.34	2.4e-06
LINC00668	SAGE1	4.79	368	0.24	0.14, 0.34	2.41e-06
LINC00668	MAP2	4.76	368	0.24	0.14, 0.33	2.82e-06
LINC00668	EME1	4.76	368	0.24	0.14, 0.33	2.83e-06
LINC00668	RTCA	4.76	368	0.24	0.14, 0.33	2.85e-06
LINC00668	CAP1	4.74	368	0.24	0.14, 0.33	3.05e-06
LINC00668	KIF20A	4.73	368	0.24	0.14, 0.33	3.2e-06
LINC00668	PAGE1	4.73	368	0.24	0.14, 0.33	3.2e-06
LINC00668	BIRC5	4.73	368	0.24	0.14, 0.33	3.23e-06
LINC00668	MRGPRX2	4.73	368	0.24	0.14, 0.33	3.26e-06
LINC00668	RPF1	4.72	368	0.24	0.14, 0.33	3.36e-06
LINC00668	KIAA1524	4.71	368	0.24	0.14, 0.33	3.44e-06
LINC00668	COCH	4.71	368	0.24	0.14, 0.33	3.49e-06
LINC00668	CCT4	4.7	368	0.24	0.14, 0.33	3.7e-06
LINC00668	CIRBP	-4.7	368	-0.24	-0.33, -0.14	3.73e-06
LINC00668	NEFM	4.69	368	0.24	0.14, 0.33	3.77e-06
LINC00668	UTP18	4.68	368	0.24	0.14, 0.33	3.97e-06
LINC00668	SASS6	4.68	368	0.24	0.14, 0.33	4.1e-06
LINC00668	IK	4.68	368	0.24	0.14, 0.33	4.11e-06
LINC00668	PSMA5	4.68	368	0.24	0.14, 0.33	4.13e-06
LINC00668	PPP1R8	4.67	368	0.24	0.14, 0.33	4.17e-06
LINC00668	CDCA5	4.67	368	0.24	0.14, 0.33	4.19e-06
LINC00668	AKR1C3	4.67	368	0.24	0.14, 0.33	4.2e-06
LINC00668	GAGE2A	4.66	368	0.24	0.14, 0.33	4.35e-06
LINC00668	TAF9	4.66	368	0.24	0.14, 0.33	4.41e-06
LINC00668	PRIM2	4.66	368	0.24	0.14, 0.33	4.43e-06
LINC00668	CEP104	4.65	368	0.24	0.14, 0.33	4.55e-06
LINC00668	CNTNAP4	4.65	368	0.24	0.14, 0.33	4.63e-06
LINC00668	PLK1	4.63	368	0.23	0.14, 0.33	4.98e-06
LINC00668	TPX2	4.63	368	0.23	0.14, 0.33	5e-06
LINC00668	ZNF85	4.63	368	0.23	0.14, 0.33	5.04e-06
LINC00668	YARS	4.62	368	0.23	0.14, 0.33	5.22e-06
LINC00668	RBMXL1	4.62	368	0.23	0.14, 0.33	5.28e-06
LINC00668	PPT1	4.62	368	0.23	0.14, 0.33	5.35e-06
LINC00668	EDC3	4.61	368	0.23	0.14, 0.33	5.44e-06
LINC00668	NKAIN2	4.61	368	0.23	0.13, 0.33	5.61e-06
LINC00668	RAD54L	4.61	368	0.23	0.13, 0.33	5.68e-06
LINC00668	ERCC6L	4.6	368	0.23	0.13, 0.33	5.74e-06
LINC00668	DHDDS	4.6	368	0.23	0.13, 0.33	5.9e-06
LINC00668	CYB5D2	-4.6	368	-0.23	-0.33, -0.13	5.95e-06
LINC00668	SF3B2	4.59	368	0.23	0.13, 0.33	6.18e-06
LINC00668	ALX1	4.58	368	0.23	0.13, 0.33	6.36e-06
LINC00668	KIFC1	4.58	368	0.23	0.13, 0.33	6.38e-06
LINC00668	CUL4B	4.58	368	0.23	0.13, 0.33	6.39e-06
LINC00668	AOC1	4.57	368	0.23	0.13, 0.33	6.81e-06
LINC00668	RFC4	4.56	368	0.23	0.13, 0.33	6.92e-06
LINC00668	LVRN	4.55	368	0.23	0.13, 0.33	7.23e-06
LINC00668	ZC2HC1A	4.55	368	0.23	0.13, 0.33	7.29e-06
LINC00668	CALCR	4.55	368	0.23	0.13, 0.32	7.44e-06
LINC00668	HJURP	4.54	368	0.23	0.13, 0.32	7.54e-06
LINC00668	CCDC192	4.54	368	0.23	0.13, 0.32	7.75e-06
LINC00668	NUF2	4.53	368	0.23	0.13, 0.32	7.9e-06
LINC00668	SARS	4.53	368	0.23	0.13, 0.32	7.95e-06
LINC00668	CHEK1	4.53	368	0.23	0.13, 0.32	8.05e-06
LINC00668	NUP85	4.51	368	0.23	0.13, 0.32	8.54e-06
LINC00668	FAM69A	4.51	368	0.23	0.13, 0.32	8.57e-06
LINC00668	KIAA2013	4.51	368	0.23	0.13, 0.32	8.9e-06
LINC00668	AKR1C1	4.5	368	0.23	0.13, 0.32	8.99e-06
LINC00668	PLCB1	4.5	368	0.23	0.13, 0.32	9.02e-06
LINC00668	RRM2	4.5	368	0.23	0.13, 0.32	9.04e-06
LINC00668	PDCD2	4.5	368	0.23	0.13, 0.32	9.09e-06
LINC00668	FUBP1	4.5	368	0.23	0.13, 0.32	9.23e-06
LINC00668	E2F2	4.49	368	0.23	0.13, 0.32	9.39e-06
LINC00668	NUSAP1	4.49	368	0.23	0.13, 0.32	9.52e-06
LINC00668	CSAG1	4.49	368	0.23	0.13, 0.32	9.72e-06
LINC00668	PRC1	4.48	368	0.23	0.13, 0.32	1e-05
LINC00668	ZNF561	-4.48	368	-0.23	-0.32, -0.13	1.01e-05
LINC00668	GMEB1	4.47	368	0.23	0.13, 0.32	1.04e-05
LINC00668	RTN4RL2	4.47	368	0.23	0.13, 0.32	1.05e-05
LINC00668	ITGB3BP	4.47	368	0.23	0.13, 0.32	1.05e-05
LINC00668	RNF26	4.47	368	0.23	0.13, 0.32	1.06e-05
LINC00668	TCEA3	4.46	368	0.23	0.13, 0.32	1.07e-05
LINC00668	ZBTB17	4.46	368	0.23	0.13, 0.32	1.1e-05
LINC00668	CNR1	4.45	368	0.23	0.13, 0.32	1.13e-05
LINC00668	MIIP	4.45	368	0.23	0.13, 0.32	1.13e-05
LINC00668	HTATIP2	4.45	368	0.23	0.13, 0.32	1.15e-05
LINC00668	TRIP4	4.44	368	0.23	0.13, 0.32	1.17e-05
LINC00668	HENMT1	4.44	368	0.23	0.13, 0.32	1.2e-05
LINC00668	CCDC112	4.43	368	0.22	0.13, 0.32	1.26e-05
LINC00668	CENPH	4.42	368	0.22	0.13, 0.32	1.29e-05
LINC00668	PKMYT1	4.42	368	0.22	0.13, 0.32	1.3e-05
LINC00668	PRR11	4.4	368	0.22	0.12, 0.32	1.42e-05
LINC00668	MELK	4.4	368	0.22	0.12, 0.32	1.44e-05
LINC00668	ALDH1A2	4.39	368	0.22	0.12, 0.32	1.45e-05
LINC00668	TRIP13	4.39	368	0.22	0.12, 0.32	1.51e-05
LINC00668	PAGE2	4.39	368	0.22	0.12, 0.32	1.51e-05
LINC00668	ZNF239	4.39	368	0.22	0.12, 0.32	1.51e-05
LINC00668	CWC27	4.38	368	0.22	0.12, 0.32	1.53e-05
LINC00668	SNX7	4.36	368	0.22	0.12, 0.32	1.67e-05
LINC00668	TUBAL3	4.36	368	0.22	0.12, 0.32	1.69e-05
LINC00668	COX7B2	4.36	368	0.22	0.12, 0.32	1.71e-05
LINC00668	NMI	4.36	368	0.22	0.12, 0.32	1.71e-05
LINC00668	HAT1	4.36	368	0.22	0.12, 0.32	1.72e-05
LINC00668	MAGEB1	4.35	368	0.22	0.12, 0.32	1.73e-05
LINC00668	GJA10	4.34	368	0.22	0.12, 0.32	1.82e-05
LINC00668	FTH1	4.34	368	0.22	0.12, 0.32	1.84e-05
LINC00668	PSMA8	4.34	368	0.22	0.12, 0.32	1.84e-05
LINC00668	ZNF883	4.34	368	0.22	0.12, 0.32	1.86e-05
LINC00668	POLQ	4.34	368	0.22	0.12, 0.32	1.87e-05
LINC00668	LRRIQ3	4.34	368	0.22	0.12, 0.32	1.88e-05
LINC00668	HEATR6	4.33	368	0.22	0.12, 0.32	1.94e-05
LINC00668	MAGEA9B	4.32	368	0.22	0.12, 0.31	1.97e-05
LINC00668	HMGB2	4.32	368	0.22	0.12, 0.31	1.98e-05
LINC00668	KNSTRN	4.31	368	0.22	0.12, 0.31	2.1e-05
LINC00668	SKA1	4.31	368	0.22	0.12, 0.31	2.11e-05
LINC00668	NUDC	4.3	368	0.22	0.12, 0.31	2.15e-05
LINC00668	KRTAP19-5	4.3	368	0.22	0.12, 0.31	2.16e-05
LINC00668	C2orf68	4.29	368	0.22	0.12, 0.31	2.27e-05
LINC00668	HDAC1	4.29	368	0.22	0.12, 0.31	2.33e-05
LINC00668	EIF3M	4.28	368	0.22	0.12, 0.31	2.44e-05
LINC00668	KIF18A	4.27	368	0.22	0.12, 0.31	2.44e-05
LINC00668	DCUN1D5	4.27	368	0.22	0.12, 0.31	2.45e-05
LINC00668	SEMA4F	4.27	368	0.22	0.12, 0.31	2.5e-05
LINC00668	LMNB1	4.27	368	0.22	0.12, 0.31	2.54e-05
LINC00668	ZWILCH	4.26	368	0.22	0.12, 0.31	2.59e-05
LINC00668	ZNF492	4.26	368	0.22	0.12, 0.31	2.62e-05
LINC00668	ZNF735	4.25	368	0.22	0.12, 0.31	2.67e-05
LINC00668	ZNF791	-4.25	368	-0.22	-0.31, -0.12	2.71e-05
LINC00668	NOL9	4.25	368	0.22	0.12, 0.31	2.77e-05
LINC00668	CHORDC1	4.24	368	0.22	0.12, 0.31	2.81e-05
LINC00668	LRRC41	4.24	368	0.22	0.12, 0.31	2.82e-05
LINC00668	GTF3C6	4.23	368	0.22	0.12, 0.31	2.96e-05
LINC00668	SLC7A9	4.22	368	0.21	0.12, 0.31	3.08e-05
LINC00668	VTA1	4.22	368	0.21	0.12, 0.31	3.09e-05
LINC00668	DCAF4L2	4.22	368	0.21	0.12, 0.31	3.09e-05
LINC00668	SGTB	4.22	368	0.21	0.12, 0.31	3.1e-05
LINC00668	MAD2L1	4.21	368	0.21	0.11, 0.31	3.24e-05
LINC00668	TCF24	4.21	368	0.21	0.11, 0.31	3.26e-05
LINC00668	PPIE	4.21	368	0.21	0.11, 0.31	3.27e-05
LINC00668	XK	4.2	368	0.21	0.11, 0.31	3.3e-05
LINC00668	EIF2B1	4.2	368	0.21	0.11, 0.31	3.3e-05
LINC00668	RPA2	4.2	368	0.21	0.11, 0.31	3.31e-05
LINC00668	ADPRHL2	4.2	368	0.21	0.11, 0.31	3.42e-05
LINC00668	XAGE5	4.19	368	0.21	0.11, 0.31	3.44e-05
LINC00668	WDR77	4.19	368	0.21	0.11, 0.31	3.51e-05
LINC00668	LYRM2	4.18	368	0.21	0.11, 0.31	3.6e-05
LINC00668	CPNE4	4.18	368	0.21	0.11, 0.31	3.62e-05
LINC00668	LATS2	-4.18	368	-0.21	-0.31, -0.11	3.67e-05
LINC00668	GNAI3	4.18	368	0.21	0.11, 0.31	3.71e-05
LINC00668	RPL11	4.17	368	0.21	0.11, 0.31	3.83e-05
LINC00668	KPNA2	4.17	368	0.21	0.11, 0.31	3.88e-05
LINC00668	CSDE1	4.16	368	0.21	0.11, 0.31	3.97e-05
LINC00668	PIF1	4.16	368	0.21	0.11, 0.31	3.99e-05
LINC00668	UQCRH	4.16	368	0.21	0.11, 0.31	4.01e-05
LINC00668	SNRNP40	4.16	368	0.21	0.11, 0.31	4.03e-05
LINC00668	DENND2C	4.15	368	0.21	0.11, 0.31	4.07e-05
LINC00668	STIL	4.15	368	0.21	0.11, 0.31	4.14e-05
LINC00668	ZNHIT6	4.15	368	0.21	0.11, 0.31	4.17e-05
LINC00668	EIF2B5	4.14	368	0.21	0.11, 0.31	4.34e-05
LINC00668	MCM2	4.14	368	0.21	0.11, 0.31	4.34e-05
LINC00668	GPATCH3	4.14	368	0.21	0.11, 0.31	4.39e-05
LINC00668	SPATA31D1	4.13	368	0.21	0.11, 0.31	4.42e-05
LINC00668	MAGOH	4.13	368	0.21	0.11, 0.31	4.44e-05
LINC00668	ZNF716	4.13	368	0.21	0.11, 0.31	4.5e-05
LINC00668	DHX57	4.13	368	0.21	0.11, 0.31	4.52e-05
LINC00668	ZSCAN20	4.13	368	0.21	0.11, 0.31	4.53e-05
LINC00668	ARHGAP11A	4.13	368	0.21	0.11, 0.31	4.55e-05
LINC00668	C5orf63	4.13	368	0.21	0.11, 0.31	4.57e-05
LINC00668	TUBA1C	4.12	368	0.21	0.11, 0.31	4.63e-05
LINC00668	TMEM69	4.12	368	0.21	0.11, 0.31	4.67e-05
LINC00668	TTC27	4.12	368	0.21	0.11, 0.31	4.67e-05
LINC00668	COX8C	4.12	368	0.21	0.11, 0.31	4.69e-05
LINC00668	BCAS1	4.11	368	0.21	0.11, 0.31	4.79e-05
LINC00668	MCM10	4.11	368	0.21	0.11, 0.31	4.81e-05
LINC00668	FAF1	4.11	368	0.21	0.11, 0.31	4.81e-05
LINC00668	UBIAD1	4.11	368	0.21	0.11, 0.3	4.87e-05
LINC00668	TPTE	4.11	368	0.21	0.11, 0.3	4.93e-05
LINC00668	NEK2	4.11	368	0.21	0.11, 0.3	4.96e-05
LINC00668	LGALS4	4.1	368	0.21	0.11, 0.3	5.02e-05
LINC00668	SNRNP200	4.1	368	0.21	0.11, 0.3	5.09e-05
LINC00668	CAPZB	4.1	368	0.21	0.11, 0.3	5.12e-05
LINC00668	RAC3	4.1	368	0.21	0.11, 0.3	5.15e-05
LINC00668	TCP1	4.1	368	0.21	0.11, 0.3	5.16e-05
LINC00668	STARD6	4.09	368	0.21	0.11, 0.3	5.26e-05
LINC00668	ZNF441	-4.09	368	-0.21	-0.3, -0.11	5.3e-05
LINC00668	C6orf120	4.09	368	0.21	0.11, 0.3	5.37e-05
LINC00668	KNL1	4.09	368	0.21	0.11, 0.3	5.37e-05
LINC00668	CENPI	4.08	368	0.21	0.11, 0.3	5.43e-05
LINC00668	TXLNA	4.08	368	0.21	0.11, 0.3	5.54e-05
LINC00668	C5orf34	4.08	368	0.21	0.11, 0.3	5.6e-05
LINC00668	UTP11	4.08	368	0.21	0.11, 0.3	5.63e-05
LINC00668	PQLC2	4.07	368	0.21	0.11, 0.3	5.83e-05
LINC00668	ATAD1	-4.07	368	-0.21	-0.3, -0.11	5.84e-05
LINC00668	SGSM1	4.06	368	0.21	0.11, 0.3	6.02e-05
LINC00668	CDC23	4.06	368	0.21	0.11, 0.3	6.1e-05
LINC00668	SMAP1	4.05	368	0.21	0.11, 0.3	6.25e-05
LINC00668	FAM72D	4.05	368	0.21	0.11, 0.3	6.34e-05
LINC00668	CCT5	4.05	368	0.21	0.11, 0.3	6.37e-05
LINC00668	DDX27	4.04	368	0.21	0.11, 0.3	6.4e-05
LINC00668	POMGNT1	4.04	368	0.21	0.11, 0.3	6.48e-05
LINC00668	NASP	4.04	368	0.21	0.11, 0.3	6.52e-05
LINC00668	TNS2	-4.04	368	-0.21	-0.3, -0.11	6.55e-05
LINC00668	TUBD1	4.04	368	0.21	0.11, 0.3	6.56e-05
LINC00668	TOPBP1	4.04	368	0.21	0.11, 0.3	6.58e-05
LINC00668	FAM122A	-4.03	368	-0.21	-0.3, -0.11	6.7e-05
LINC00668	DPF2	4.03	368	0.21	0.11, 0.3	6.85e-05
LINC00668	CNOT10	4.02	368	0.21	0.11, 0.3	7.1e-05
LINC00668	TRAIP	4.02	368	0.2	0.11, 0.3	7.17e-05
LINC00668	ZNF700	-4.02	368	-0.2	-0.3, -0.11	7.18e-05
LINC00668	GAS2	4.01	368	0.2	0.11, 0.3	7.23e-05
LINC00668	43357	4.01	368	0.2	0.1, 0.3	7.33e-05
LINC00668	PEF1	4	368	0.2	0.1, 0.3	7.57e-05
LINC00668	NPFFR2	4	368	0.2	0.1, 0.3	7.58e-05
LINC00668	DLGAP5	4	368	0.2	0.1, 0.3	7.6e-05
LINC00668	ZNF738	4	368	0.2	0.1, 0.3	7.63e-05
LINC00668	UBTD2	4	368	0.2	0.1, 0.3	7.79e-05
LINC00668	CES1	3.99	368	0.2	0.1, 0.3	7.87e-05
LINC00668	GINS1	3.99	368	0.2	0.1, 0.3	7.88e-05
LINC00668	CDC45	3.99	368	0.2	0.1, 0.3	7.89e-05
LINC00668	PTCHD3	3.99	368	0.2	0.1, 0.3	7.93e-05
LINC00668	TBC1D16	3.99	368	0.2	0.1, 0.3	7.96e-05
LINC00668	POLR3G	3.99	368	0.2	0.1, 0.3	7.97e-05
LINC00668	RPF2	3.99	368	0.2	0.1, 0.3	7.97e-05
LINC00668	PAGE2B	3.99	368	0.2	0.1, 0.3	7.98e-05
LINC00668	AK9	3.99	368	0.2	0.1, 0.3	8.07e-05
LINC00668	SIKE1	3.99	368	0.2	0.1, 0.3	8.1e-05
LINC00668	PARS2	3.98	368	0.2	0.1, 0.3	8.37e-05
LINC00668	MAGEA11	3.98	368	0.2	0.1, 0.3	8.46e-05
LINC00668	UGT1A6	3.97	368	0.2	0.1, 0.3	8.47e-05
LINC00668	ABCC12	3.97	368	0.2	0.1, 0.3	8.51e-05
LINC00668	MLF1	3.97	368	0.2	0.1, 0.3	8.53e-05
LINC00668	ERI3	3.97	368	0.2	0.1, 0.3	8.73e-05
LINC00668	TRPM6	3.97	368	0.2	0.1, 0.3	8.81e-05
LINC00668	FANCA	3.96	368	0.2	0.1, 0.3	8.89e-05
LINC00668	PDIA6	3.95	368	0.2	0.1, 0.3	9.34e-05
LINC00668	RAN	3.94	368	0.2	0.1, 0.3	9.62e-05
LINC00668	HSPA8	3.94	368	0.2	0.1, 0.3	9.62e-05
LINC00668	FAM218A	3.94	368	0.2	0.1, 0.3	9.79e-05
LINC00668	SRXN1	3.94	368	0.2	0.1, 0.3	9.8e-05
LINC00668	ZNF14	3.94	368	0.2	0.1, 0.3	9.84e-05
LINC00668	PITPNA	-3.94	368	-0.2	-0.3, -0.1	9.85e-05
LINC00668	OSGIN2	3.94	368	0.2	0.1, 0.3	9.91e-05
LINC00668	NUP107	3.94	368	0.2	0.1, 0.3	9.92e-05
LINC00668	RAD51C	3.93	368	0.2	0.1, 0.3	0.000103
LINC00668	TMEM201	3.92	368	0.2	0.1, 0.3	0.000105
LINC00668	C18orf54	3.91	368	0.2	0.1, 0.3	0.000108
LINC00668	ME1	3.91	368	0.2	0.1, 0.3	0.000108
LINC00668	XCL1	3.91	368	0.2	0.1, 0.3	0.000108
LINC00668	SCLY	3.91	368	0.2	0.1, 0.3	0.00011
LINC00668	ZFP64	3.9	368	0.2	0.1, 0.3	0.000112
LINC00668	XRCC6	3.9	368	0.2	0.1, 0.3	0.000112
LINC00668	PPIH	3.9	368	0.2	0.099, 0.295	0.000113
LINC00668	CCT7	3.9	368	0.2	0.099, 0.295	0.000113
LINC00668	CSE1L	3.9	368	0.2	0.099, 0.295	0.000113
LINC00668	RCAN3	3.9	368	0.2	0.099, 0.295	0.000114
LINC00668	YAF2	-3.9	368	-0.2	-0.295, -0.099	0.000114
LINC00668	NSFL1C	3.9	368	0.2	0.099, 0.295	0.000115
LINC00668	KIF15	3.9	368	0.2	0.099, 0.295	0.000116
LINC00668	ZNF98	3.89	368	0.2	0.099, 0.295	0.000117
LINC00668	GTF3C3	3.89	368	0.2	0.099, 0.295	0.000118
LINC00668	PSMB1	3.89	368	0.2	0.099, 0.295	0.000119
LINC00668	BLM	3.89	368	0.2	0.099, 0.295	0.00012
LINC00668	PLK4	3.89	368	0.2	0.099, 0.295	0.00012
LINC00668	CCM2L	-3.88	368	-0.2	-0.294, -0.098	0.000123
LINC00668	CAPZA1	3.88	368	0.2	0.098, 0.294	0.000123
LINC00668	MFN2	3.88	368	0.2	0.098, 0.294	0.000124
LINC00668	NPHS2	3.88	368	0.2	0.098, 0.294	0.000124
LINC00668	LRRC70	-3.88	368	-0.2	-0.294, -0.098	0.000126
LINC00668	FCGR3B	3.87	368	0.2	0.098, 0.294	0.000128
LINC00668	P3H1	3.87	368	0.2	0.098, 0.294	0.000129
LINC00668	TF	3.87	368	0.2	0.098, 0.294	0.000129
LINC00668	FBXO44	3.87	368	0.2	0.098, 0.294	0.000131
LINC00668	FN1	3.87	368	0.2	0.098, 0.294	0.000131
LINC00668	DSCR4	3.87	368	0.2	0.098, 0.294	0.000131
LINC00668	KTI12	3.86	368	0.2	0.097, 0.293	0.000132
LINC00668	HSPA4	3.86	368	0.2	0.097, 0.294	0.000132
LINC00668	KHDC1L	3.86	368	0.2	0.097, 0.293	0.000133
LINC00668	SRM	3.86	368	0.2	0.097, 0.293	0.000136
LINC00668	NECAP2	3.86	368	0.2	0.097, 0.293	0.000136
LINC00668	AC008770.3	-3.85	368	-0.2	-0.293, -0.097	0.000137
LINC00668	DNAJB6	3.85	368	0.2	0.097, 0.293	0.000139
LINC00668	CENPW	3.85	368	0.2	0.097, 0.293	0.000139
LINC00668	TALDO1	3.85	368	0.2	0.097, 0.293	0.00014
LINC00668	COX18	-3.84	368	-0.2	-0.293, -0.096	0.000143
LINC00668	CENPA	3.84	368	0.2	0.096, 0.293	0.000143
LINC00668	MCM8	3.84	368	0.2	0.096, 0.292	0.000144
LINC00668	CPSF3	3.84	368	0.2	0.096, 0.292	0.000147
LINC00668	SLC35E2B	3.83	368	0.2	0.096, 0.292	0.000148
LINC00668	CCDC110	3.83	368	0.2	0.096, 0.292	0.000148
LINC00668	FLNC	3.83	368	0.2	0.096, 0.292	0.000149
LINC00668	C5orf58	3.82	368	0.2	0.095, 0.291	0.000157
LINC00668	ZNF43	3.82	368	0.2	0.095, 0.291	0.000158
LINC00668	CEP85	3.82	368	0.2	0.095, 0.291	0.000158
LINC00668	PSMD1	3.82	368	0.2	0.095, 0.291	0.000158
LINC00668	GDAP1	3.82	368	0.2	0.095, 0.291	0.000158
LINC00668	TK1	3.81	368	0.2	0.095, 0.291	0.00016
LINC00668	HGS	3.82	368	0.2	0.095, 0.291	0.00016
LINC00668	WRAP73	3.81	368	0.2	0.095, 0.291	0.00016
LINC00668	LRP11	3.81	368	0.19	0.095, 0.291	0.000164
LINC00668	DHDH	3.81	368	0.19	0.095, 0.291	0.000165
LINC00668	MRPL20	3.81	368	0.19	0.095, 0.291	0.000165
LINC00668	SAMD13	3.8	368	0.19	0.094, 0.291	0.000167
LINC00668	DNTTIP2	3.8	368	0.19	0.094, 0.291	0.000169
LINC00668	RACGAP1	3.8	368	0.19	0.094, 0.29	0.000171
LINC00668	CDC37L1	-3.8	368	-0.19	-0.29, -0.094	0.000172
LINC00668	YTHDF2	3.79	368	0.19	0.094, 0.29	0.000173
LINC00668	MCM5	3.79	368	0.19	0.094, 0.29	0.000177
LINC00668	AKR1C2	3.79	368	0.19	0.094, 0.29	0.000177
LINC00668	ZPR1	3.79	368	0.19	0.094, 0.29	0.000178
LINC00668	MEAF6	3.78	368	0.19	0.093, 0.29	0.000183
LINC00668	SPESP1	3.77	368	0.19	0.093, 0.289	0.000186
LINC00668	WDR45B	3.78	368	0.19	0.093, 0.289	0.000186
LINC00668	ZNF781	3.77	368	0.19	0.093, 0.289	0.000187
LINC00668	SNRPC	3.77	368	0.19	0.093, 0.289	0.000187
LINC00668	RDM1	3.77	368	0.19	0.093, 0.289	0.000188
LINC00668	LRRC47	3.77	368	0.19	0.093, 0.289	0.000188
LINC00668	ATAD3A	3.77	368	0.19	0.093, 0.289	0.000189
LINC00668	RTN3	3.77	368	0.19	0.093, 0.289	0.00019
LINC00668	SBK3	3.77	368	0.19	0.093, 0.289	0.00019
LINC00668	TMEM39B	3.77	368	0.19	0.093, 0.289	0.000191
LINC00668	TBC1D32	3.77	368	0.19	0.092, 0.289	0.000193
LINC00668	SKIDA1	3.76	368	0.19	0.092, 0.289	0.000195
LINC00668	ZFYVE27	-3.76	368	-0.19	-0.289, -0.092	0.000195
LINC00668	TTC19	-3.76	368	-0.19	-0.289, -0.092	0.000196
LINC00668	PSMD2	3.76	368	0.19	0.092, 0.289	0.000198
LINC00668	PEX10	3.75	368	0.19	0.092, 0.288	0.000203
LINC00668	H2AFZ	3.75	368	0.19	0.092, 0.288	0.000205
LINC00668	FOXR2	3.74	368	0.19	0.091, 0.288	0.000211
LINC00668	POLE3	3.74	368	0.19	0.091, 0.288	0.000212
LINC00668	TCOF1	3.74	368	0.19	0.091, 0.288	0.000216
LINC00668	DUSP16	-3.73	368	-0.19	-0.287, -0.091	0.000218
LINC00668	UBE2J1	3.73	368	0.19	0.091, 0.287	0.000218
LINC00668	DTYMK	3.73	368	0.19	0.091, 0.287	0.000219
LINC00668	GFY	3.73	368	0.19	0.091, 0.287	0.000222
LINC00668	RPL5	3.72	368	0.19	0.09, 0.29	0.000227
LINC00668	IQCB1	3.72	368	0.19	0.09, 0.29	0.00023
LINC00668	SZRD1	3.72	368	0.19	0.09, 0.29	0.000231
LINC00668	MYCBPAP	3.71	368	0.19	0.09, 0.29	0.000242
LINC00668	ZNF816	3.7	368	0.19	0.089, 0.286	0.000245
LINC00668	NAP1L6	3.7	368	0.19	0.089, 0.286	0.000245
LINC00668	RAD18	3.7	368	0.19	0.089, 0.286	0.000249
LINC00668	CAMTA2	-3.7	368	-0.19	-0.286, -0.089	0.000252
LINC00668	LRRC42	3.69	368	0.19	0.089, 0.286	0.000254
LINC00668	MAGEB10	3.69	368	0.19	0.089, 0.285	0.000259
LINC00668	RABEP1	-3.69	368	-0.19	-0.285, -0.089	0.000259
LINC00668	C16orf59	3.69	368	0.19	0.089, 0.285	0.00026
LINC00668	RCL1	-3.69	368	-0.19	-0.285, -0.088	0.000262
LINC00668	AK3	-3.68	368	-0.19	-0.285, -0.088	0.000266
LINC00668	RNF17	3.68	368	0.19	0.088, 0.285	0.000266
LINC00668	EIF3B	3.68	368	0.19	0.088, 0.285	0.000267
LINC00668	MUTYH	3.68	368	0.19	0.088, 0.285	0.000269
LINC00668	CXorf67	3.68	368	0.19	0.088, 0.285	0.00027
LINC00668	CCDC163	3.68	368	0.19	0.088, 0.285	0.000271
LINC00668	BRCA1	3.68	368	0.19	0.088, 0.285	0.000271
LINC00668	ATG5	3.68	368	0.19	0.088, 0.285	0.000273
LINC00668	SHQ1	3.67	368	0.19	0.088, 0.285	0.000274
LINC00668	RIC8A	3.67	368	0.19	0.088, 0.284	0.000278
LINC00668	RTL8A	3.67	368	0.19	0.087, 0.284	0.000283
LINC00668	SRL	-3.67	368	-0.19	-0.284, -0.087	0.000283
LINC00668	ZNF99	3.66	368	0.19	0.087, 0.284	0.000285
LINC00668	APBB1	3.66	368	0.19	0.087, 0.284	0.000288
LINC00668	PNRC2	3.66	368	0.19	0.087, 0.284	0.000289
LINC00668	PDE2A	-3.66	368	-0.19	-0.284, -0.087	0.000289
LINC00668	CDC25B	3.66	368	0.19	0.087, 0.284	0.000293
LINC00668	CUX1	-3.66	368	-0.19	-0.284, -0.087	0.000294
LINC00668	INTS1	3.66	368	0.19	0.087, 0.284	0.000294
LINC00668	TRMT112	3.66	368	0.19	0.087, 0.284	0.000295
LINC00668	NLN	3.65	368	0.19	0.087, 0.284	0.000296
LINC00668	LYPD8	3.65	368	0.19	0.087, 0.284	0.000296
LINC00668	SUPT4H1	3.65	368	0.19	0.087, 0.283	0.0003
LINC00668	KCMF1	3.65	368	0.19	0.087, 0.283	0.0003
LINC00668	ERCC6L2	-3.65	368	-0.19	-0.283, -0.087	0.000302
LINC00668	TXNRD1	3.65	368	0.19	0.086, 0.283	0.000303
LINC00668	RPS8	3.65	368	0.19	0.086, 0.283	0.000304
LINC00668	FANCI	3.64	368	0.19	0.086, 0.283	0.000308
LINC00668	CRNKL1	3.64	368	0.19	0.086, 0.283	0.000309
LINC00668	MYCT1	-3.64	368	-0.19	-0.283, -0.086	0.00031
LINC00668	CLCC1	3.64	368	0.19	0.086, 0.283	0.000311
LINC00668	CENPU	3.64	368	0.19	0.086, 0.283	0.000312
LINC00668	DR1	3.64	368	0.19	0.086, 0.283	0.000312
LINC00668	RRAGC	3.64	368	0.19	0.086, 0.283	0.000315
LINC00668	PHAX	3.64	368	0.19	0.086, 0.283	0.000317
LINC00668	MICU1	-3.63	368	-0.19	-0.283, -0.086	0.000319
LINC00668	GJA4	-3.63	368	-0.19	-0.283, -0.086	0.00032
LINC00668	FOXD2	3.63	368	0.19	0.086, 0.283	0.000323
LINC00668	NUP43	3.63	368	0.19	0.086, 0.283	0.000324
LINC00668	PARK7	3.62	368	0.19	0.085, 0.282	0.000333
LINC00668	MND1	3.62	368	0.19	0.085, 0.282	0.000336
LINC00668	TMCO4	3.62	368	0.19	0.085, 0.282	0.000336
LINC00668	RGS14	3.62	368	0.19	0.085, 0.282	0.000336
LINC00668	DDX1	3.62	368	0.19	0.085, 0.282	0.000336
LINC00668	CBX2	3.62	368	0.19	0.085, 0.282	0.00034
LINC00668	CIT	3.61	368	0.18	0.085, 0.282	0.000349
LINC00668	MKNK1	3.61	368	0.18	0.084, 0.281	0.000351
LINC00668	PBK	3.61	368	0.18	0.084, 0.281	0.000355
LINC00668	PUSL1	3.6	368	0.18	0.084, 0.281	0.000357
LINC00668	NAXD	-3.6	368	-0.18	-0.281, -0.084	0.00036
LINC00668	AP002495.1	3.6	368	0.18	0.084, 0.281	0.000361
LINC00668	PANX3	3.6	368	0.18	0.084, 0.281	0.000362
LINC00668	ZNF557	-3.6	368	-0.18	-0.281, -0.084	0.000364
LINC00668	PIK3CB	3.6	368	0.18	0.084, 0.281	0.000366
LINC00668	RNF220	3.59	368	0.18	0.084, 0.281	0.000369
LINC00668	TRPM2	3.59	368	0.18	0.084, 0.281	0.00037
LINC00668	ATIC	3.59	368	0.18	0.084, 0.281	0.000371
LINC00668	NAP1L3	3.59	368	0.18	0.084, 0.281	0.000374
LINC00668	S1PR1	-3.59	368	-0.18	-0.281, -0.084	0.000374
LINC00668	POLA2	3.59	368	0.18	0.084, 0.281	0.000375
LINC00668	SNRPB	3.59	368	0.18	0.083, 0.281	0.000377
LINC00668	FAM110D	-3.59	368	-0.18	-0.281, -0.083	0.000378
LINC00668	SPAG7	-3.59	368	-0.18	-0.281, -0.083	0.000378
LINC00668	TUBA1B	3.59	368	0.18	0.083, 0.281	0.000379
LINC00668	VAMP2	-3.59	368	-0.18	-0.28, -0.083	0.00038
LINC00668	AGGF1	3.58	368	0.18	0.083, 0.28	0.000385
LINC00668	ZNF317	-3.58	368	-0.18	-0.28, -0.083	0.000387
LINC00668	CCDC184	-3.58	368	-0.18	-0.28, -0.083	0.000387
LINC00668	PCLAF	3.58	368	0.18	0.083, 0.28	0.000387
LINC00668	KCNE5	3.58	368	0.18	0.083, 0.28	0.000388
LINC00668	MYBL2	3.58	368	0.18	0.083, 0.28	0.000389
LINC00668	CCNI2	3.58	368	0.18	0.083, 0.28	0.000393
LINC00668	EMCN	-3.58	368	-0.18	-0.28, -0.083	0.000393
LINC00668	PER1	-3.57	368	-0.18	-0.28, -0.083	0.000397
LINC00668	EIF4A3	3.57	368	0.18	0.083, 0.28	0.000398
LINC00668	KCNK9	3.57	368	0.18	0.083, 0.28	0.000398
LINC00668	RUVBL1	3.57	368	0.18	0.082, 0.28	0.000409
LINC00668	C1orf159	3.57	368	0.18	0.082, 0.28	0.00041
LINC00668	RHOXF2B	3.56	368	0.18	0.082, 0.279	0.000412
LINC00668	VCX3B	3.56	368	0.18	0.082, 0.279	0.000414
LINC00668	ZNF18	-3.56	368	-0.18	-0.279, -0.082	0.000417
LINC00668	AATF	3.56	368	0.18	0.082, 0.279	0.000424
LINC00668	SAT1	-3.56	368	-0.18	-0.279, -0.082	0.000424
LINC00668	SDF4	3.55	368	0.18	0.082, 0.279	0.000428
LINC00668	ANKRD45	3.55	368	0.18	0.082, 0.279	0.000433
LINC00668	SOHLH2	3.54	368	0.18	0.081, 0.279	0.000443
LINC00668	SAR1A	-3.54	368	-0.18	-0.278, -0.081	0.000448
LINC00668	ETFRF1	-3.54	368	-0.18	-0.278, -0.081	0.000452
LINC00668	GABRA3	3.54	368	0.18	0.081, 0.278	0.000452
LINC00668	TUBB	3.54	368	0.18	0.081, 0.278	0.000456
LINC00668	NGLY1	3.54	368	0.18	0.081, 0.278	0.000459
LINC00668	TACC3	3.53	368	0.18	0.081, 0.278	0.000461
LINC00668	CNOT6L	-3.53	368	-0.18	-0.28, -0.08	0.000469
LINC00668	SPAG5	3.53	368	0.18	0.08, 0.28	0.000472
LINC00668	FANCB	3.52	368	0.18	0.08, 0.28	0.000478
LINC00668	TICRR	3.52	368	0.18	0.08, 0.28	0.00048
LINC00668	VBP1	3.52	368	0.18	0.08, 0.28	0.000486
LINC00668	EFTUD2	3.52	368	0.18	0.08, 0.28	0.000488
LINC00668	MCF2L	-3.52	368	-0.18	-0.28, -0.08	0.000494
LINC00668	FAM182B	3.51	368	0.18	0.08, 0.28	0.000495
LINC00668	ASF1A	3.51	368	0.18	0.08, 0.28	0.000496
LINC00668	RARS	3.51	368	0.18	0.08, 0.28	0.000497
LINC00668	UBE3D	3.51	368	0.18	0.08, 0.28	0.000499
LINC00668	ADCY4	-3.51	368	-0.18	-0.28, -0.08	0.000499
LINC00668	H1FNT	3.51	368	0.18	0.08, 0.28	0.000499
LINC00668	CCDC188	-3.51	368	-0.18	-0.277, -0.079	0.000504
LINC00668	POLD1	3.51	368	0.18	0.079, 0.277	0.000509
LINC00668	ABHD14B	-3.51	368	-0.18	-0.277, -0.079	0.000512
LINC00668	PKIB	3.5	368	0.18	0.079, 0.277	0.000515
LINC00668	CARF	-3.5	368	-0.18	-0.276, -0.079	0.000522
LINC00668	SOCS2	-3.5	368	-0.18	-0.276, -0.079	0.000522
LINC00668	PFKFB4	3.5	368	0.18	0.079, 0.276	0.000523
LINC00668	SLC1A1	-3.5	368	-0.18	-0.276, -0.079	0.000527
LINC00668	GPBP1L1	3.5	368	0.18	0.079, 0.276	0.000528
LINC00668	CABP4	3.5	368	0.18	0.079, 0.276	0.000531
LINC00668	MCMDC2	3.49	368	0.18	0.078, 0.276	0.000543
LINC00668	CCNYL1	3.49	368	0.18	0.078, 0.276	0.000544
LINC00668	CENPK	3.49	368	0.18	0.078, 0.276	0.000546
LINC00668	SCARF1	-3.49	368	-0.18	-0.276, -0.078	0.000547
LINC00668	SEH1L	3.48	368	0.18	0.078, 0.276	0.000556
LINC00668	DDX18	3.48	368	0.18	0.078, 0.276	0.000558
LINC00668	TMEM52	3.48	368	0.18	0.078, 0.276	0.000558
LINC00668	NCBP3	-3.48	368	-0.18	-0.276, -0.078	0.000558
LINC00668	B3GAT3	3.48	368	0.18	0.078, 0.275	0.000559
LINC00668	ZNF562	-3.48	368	-0.18	-0.275, -0.078	0.000565
LINC00668	AC008758.4	-3.48	368	-0.18	-0.275, -0.078	0.000568
LINC00668	SLC25A28	-3.47	368	-0.18	-0.275, -0.078	0.000574
LINC00668	SNX2	3.47	368	0.18	0.078, 0.275	0.000575
LINC00668	NRIP2	-3.47	368	-0.18	-0.275, -0.078	0.000579
LINC00668	COPB2	3.47	368	0.18	0.077, 0.275	0.000584
LINC00668	POU6F1	-3.47	368	-0.18	-0.275, -0.077	0.000585
LINC00668	ESPL1	3.47	368	0.18	0.077, 0.275	0.000587
LINC00668	MNS1	3.46	368	0.18	0.077, 0.275	0.000597
LINC00668	KRTAP20-4	3.46	368	0.18	0.077, 0.275	0.000598
LINC00668	GTF2B	3.46	368	0.18	0.077, 0.275	0.000601
LINC00668	PTGES3	3.46	368	0.18	0.077, 0.274	0.000604
LINC00668	SKA3	3.45	368	0.18	0.077, 0.274	0.000622
LINC00668	RHOC	3.45	368	0.18	0.076, 0.274	0.00063
LINC00668	CHML	3.45	368	0.18	0.076, 0.274	0.000634
LINC00668	ZBTB8OS	3.45	368	0.18	0.076, 0.274	0.000635
LINC00668	UBE2S	3.44	368	0.18	0.076, 0.274	0.000639
LINC00668	ATG10	3.44	368	0.18	0.076, 0.274	0.000639
LINC00668	KIF23	3.44	368	0.18	0.076, 0.274	0.000644
LINC00668	GPRC5D	3.44	368	0.18	0.076, 0.274	0.000648
LINC00668	LMO2	-3.44	368	-0.18	-0.273, -0.076	0.000655
LINC00668	RAMP3	-3.44	368	-0.18	-0.273, -0.076	0.000659
LINC00668	RHOJ	-3.43	368	-0.18	-0.273, -0.075	0.000671
LINC00668	ZMAT3	-3.43	368	-0.18	-0.273, -0.075	0.000681
LINC00668	THOC7	3.42	368	0.18	0.075, 0.273	0.000686
LINC00668	PSME4	3.42	368	0.18	0.075, 0.273	0.000687
LINC00668	ERG	-3.42	368	-0.18	-0.273, -0.075	0.000692
LINC00668	ZIC4	3.42	368	0.18	0.075, 0.273	0.000694
LINC00668	DCAF12L1	3.42	368	0.18	0.075, 0.273	0.000694
LINC00668	DRG1	3.42	368	0.18	0.075, 0.273	0.000694
LINC00668	PARPBP	3.42	368	0.18	0.075, 0.273	0.000694
LINC00668	MMS22L	3.42	368	0.18	0.075, 0.273	0.000697
LINC00668	FXYD6	-3.42	368	-0.18	-0.273, -0.075	0.0007
LINC00668	MAGEA8	3.42	368	0.18	0.075, 0.272	0.000705
LINC00668	MMAA	-3.41	368	-0.18	-0.272, -0.075	0.00071
LINC00668	FAM133B	-3.41	368	-0.17	-0.272, -0.074	0.000723
LINC00668	ANO10	3.41	368	0.17	0.074, 0.272	0.000731
LINC00668	FAM178B	3.41	368	0.17	0.074, 0.272	0.000732
LINC00668	VRK2	3.41	368	0.17	0.074, 0.272	0.000734
LINC00668	LASP1	3.4	368	0.17	0.074, 0.272	0.000738
LINC00668	RBBP4	3.4	368	0.17	0.074, 0.272	0.000738
LINC00668	GAS6	-3.4	368	-0.17	-0.272, -0.074	0.000739
LINC00668	NT5E	3.4	368	0.17	0.074, 0.271	0.000757
LINC00668	TMEM144	3.4	368	0.17	0.074, 0.271	0.000759
LINC00668	ZSCAN31	3.4	368	0.17	0.074, 0.271	0.000759
LINC00668	PLPP6	-3.39	368	-0.17	-0.271, -0.074	0.000761
LINC00668	PRMT5	3.4	368	0.17	0.074, 0.271	0.000761
LINC00668	SUFU	-3.39	368	-0.17	-0.271, -0.074	0.000766
LINC00668	VCX3A	3.39	368	0.17	0.074, 0.271	0.000767
LINC00668	GABARAPL1	-3.39	368	-0.17	-0.271, -0.073	0.000773
LINC00668	GEMIN5	3.39	368	0.17	0.073, 0.271	0.000774
LINC00668	MTRNR2L12	3.39	368	0.17	0.073, 0.271	0.000778
LINC00668	EXOC3L1	-3.39	368	-0.17	-0.271, -0.073	0.000782
LINC00668	FBXO43	3.39	368	0.17	0.073, 0.271	0.000786
LINC00668	HSF2	3.39	368	0.17	0.073, 0.271	0.000788
LINC00668	DSCC1	3.38	368	0.17	0.073, 0.271	0.000788
LINC00668	RNF186	3.38	368	0.17	0.073, 0.271	0.000792
LINC00668	TM2D1	3.38	368	0.17	0.073, 0.271	0.000797
LINC00668	TBP	3.38	368	0.17	0.073, 0.271	0.000798
LINC00668	MED24	3.38	368	0.17	0.073, 0.271	0.0008
LINC00668	STPG1	3.38	368	0.17	0.073, 0.271	0.0008
LINC00668	ANLN	3.38	368	0.17	0.073, 0.271	0.000807
LINC00668	PSD2	3.38	368	0.17	0.073, 0.271	0.000809
LINC00668	TMEM255B	-3.38	368	-0.17	-0.271, -0.073	0.000811
LINC00668	FAM72A	3.37	368	0.17	0.073, 0.27	0.00082
LINC00668	RPAIN	-3.37	368	-0.17	-0.27, -0.073	0.000821
LINC00668	GADD45B	-3.37	368	-0.17	-0.27, -0.072	0.000825
LINC00668	VSIG10	3.37	368	0.17	0.072, 0.27	0.000842
LINC00668	CSAD	-3.37	368	-0.17	-0.27, -0.072	0.000844
LINC00668	LURAP1	3.36	368	0.17	0.072, 0.27	0.000846
LINC00668	AL662899.3	3.36	368	0.17	0.072, 0.27	0.000874
LINC00668	CYYR1	-3.35	368	-0.17	-0.269, -0.072	0.000879
LINC00668	TPRKB	3.35	368	0.17	0.071, 0.269	0.000896
LINC00668	TUBA4A	3.35	368	0.17	0.071, 0.269	0.000897
LINC00668	ZMYM4	3.35	368	0.17	0.071, 0.269	0.000904
LINC00668	ZFPL1	3.35	368	0.17	0.071, 0.269	0.000907
LINC00668	DENR	3.34	368	0.17	0.071, 0.269	0.000922
LINC00668	APOBEC3B	3.34	368	0.17	0.071, 0.269	0.000923
LINC00668	AURKA	3.34	368	0.17	0.071, 0.269	0.000926
LINC00668	MRPL49	3.34	368	0.17	0.071, 0.269	0.000932
LINC00668	AK4	3.34	368	0.17	0.071, 0.269	0.000933
LINC00668	COQ4	-3.34	368	-0.17	-0.269, -0.071	0.000935
LINC00668	NDEL1	-3.33	368	-0.17	-0.27, -0.07	0.000951
LINC00668	PRPF19	3.33	368	0.17	0.07, 0.27	0.000964
LINC00668	PROX1	-3.33	368	-0.17	-0.27, -0.07	0.000967
LINC00668	COIL	3.33	368	0.17	0.07, 0.27	0.000967
LINC00668	HSP90AB1	3.32	368	0.17	0.07, 0.27	0.00098
LINC00668	AGPAT4	3.32	368	0.17	0.07, 0.27	0.000981
LINC00668	TXNDC12	3.32	368	0.17	0.07, 0.27	0.000986
LINC00668	KHDRBS1	3.32	368	0.17	0.07, 0.27	0.000996
LINC00668	INCENP	3.32	368	0.17	0.07, 0.27	0.000996
LINC00668	TBXA2R	-3.31	368	-0.17	-0.27, -0.07	0.00101
LINC00668	TRIM60	3.31	368	0.17	0.07, 0.27	0.00101
LINC00668	COPB1	3.32	368	0.17	0.07, 0.27	0.00101
LINC00668	FBXO21	-3.31	368	-0.17	-0.267, -0.069	0.00102
LINC00668	ADARB1	-3.31	368	-0.17	-0.267, -0.069	0.00102
LINC00668	CCSER2	-3.31	368	-0.17	-0.267, -0.069	0.00102
LINC00668	MCRIP1	3.31	368	0.17	0.069, 0.267	0.00102
LINC00668	ZFP69B	3.31	368	0.17	0.069, 0.267	0.00103
LINC00668	TRAPPC3	3.31	368	0.17	0.069, 0.267	0.00103
LINC00668	ANKRD24	-3.31	368	-0.17	-0.267, -0.069	0.00104
LINC00668	POC1A	3.31	368	0.17	0.069, 0.267	0.00104
LINC00668	PWP1	3.3	368	0.17	0.069, 0.267	0.00105
LINC00668	PAQR7	3.3	368	0.17	0.069, 0.267	0.00105
LINC00668	ABHD17B	-3.3	368	-0.17	-0.267, -0.069	0.00105
LINC00668	TRMT6	3.3	368	0.17	0.069, 0.267	0.00107
LINC00668	ZNF644	3.3	368	0.17	0.069, 0.267	0.00107
LINC00668	PYCR1	3.29	368	0.17	0.068, 0.267	0.00108
LINC00668	AMZ1	3.3	368	0.17	0.069, 0.267	0.00108
LINC00668	WDR53	3.29	368	0.17	0.068, 0.267	0.00108
LINC00668	ALG3	3.29	368	0.17	0.068, 0.267	0.00108
LINC00668	COX7A2	3.3	368	0.17	0.069, 0.267	0.00108
LINC00668	TRNP1	3.29	368	0.17	0.068, 0.267	0.00108
LINC00668	PGAP2	3.29	368	0.17	0.068, 0.267	0.00109
LINC00668	GOLGA8N	-3.29	368	-0.17	-0.266, -0.068	0.00109
LINC00668	SH2D5	3.29	368	0.17	0.068, 0.267	0.00109
LINC00668	DUSP1	-3.29	368	-0.17	-0.266, -0.068	0.0011
LINC00668	CCT6A	3.29	368	0.17	0.068, 0.266	0.00111
LINC00668	SFMBT1	3.29	368	0.17	0.068, 0.266	0.00111
LINC00668	VRK1	3.29	368	0.17	0.068, 0.266	0.00111
LINC00668	PPP4C	3.29	368	0.17	0.068, 0.266	0.00111
LINC00668	SELENOF	3.29	368	0.17	0.068, 0.266	0.00112
LINC00668	RARS2	3.29	368	0.17	0.068, 0.266	0.00112
LINC00668	YIPF5	3.29	368	0.17	0.068, 0.266	0.00112
LINC00668	CDV3	3.28	368	0.17	0.068, 0.266	0.00112
LINC00668	JPT1	3.28	368	0.17	0.068, 0.266	0.00114
LINC00668	RGS19	3.28	368	0.17	0.068, 0.266	0.00114
LINC00668	TXLNB	3.28	368	0.17	0.068, 0.266	0.00114
LINC00668	UBE2T	3.28	368	0.17	0.068, 0.266	0.00115
LINC00668	RBM45	3.28	368	0.17	0.068, 0.266	0.00115
LINC00668	DNAJB12	-3.27	368	-0.17	-0.266, -0.067	0.00116
LINC00668	ARFIP2	3.27	368	0.17	0.067, 0.266	0.00116
LINC00668	C20orf202	3.27	368	0.17	0.067, 0.266	0.00116
LINC00668	THOC5	3.27	368	0.17	0.067, 0.266	0.00117
LINC00668	PRKAR2A	3.27	368	0.17	0.067, 0.265	0.00119
LINC00668	PLEKHG1	-3.27	368	-0.17	-0.265, -0.067	0.00119
LINC00668	PSPN	-3.27	368	-0.17	-0.265, -0.067	0.00119
LINC00668	SLC25A24	3.26	368	0.17	0.067, 0.265	0.0012
LINC00668	TFG	3.26	368	0.17	0.067, 0.265	0.0012
LINC00668	FBXO42	3.26	368	0.17	0.067, 0.265	0.0012
LINC00668	NEURL4	-3.26	368	-0.17	-0.265, -0.067	0.00121
LINC00668	CTAGE5	-3.26	368	-0.17	-0.265, -0.067	0.00121
LINC00668	HEXB	3.26	368	0.17	0.067, 0.265	0.00121
LINC00668	UBR4	3.26	368	0.17	0.067, 0.265	0.00121
LINC00668	RPS6KA1	3.26	368	0.17	0.067, 0.265	0.00122
LINC00668	SF3A2	3.26	368	0.17	0.067, 0.265	0.00122
LINC00668	DSCR8	3.26	368	0.17	0.067, 0.265	0.00123
LINC00668	MOAP1	-3.26	368	-0.17	-0.265, -0.067	0.00123
LINC00668	SPATS2	3.26	368	0.17	0.067, 0.265	0.00123
LINC00668	FAAP20	3.25	368	0.17	0.066, 0.265	0.00124
LINC00668	FAM90A1	3.25	368	0.17	0.066, 0.265	0.00125
LINC00668	ROBO4	-3.25	368	-0.17	-0.265, -0.066	0.00126
LINC00668	RAPGEF3	-3.25	368	-0.17	-0.265, -0.066	0.00126
LINC00668	CHCHD2	3.25	368	0.17	0.066, 0.264	0.00126
LINC00668	CDCA7L	3.25	368	0.17	0.066, 0.264	0.00127
LINC00668	CDK11B	3.25	368	0.17	0.066, 0.264	0.00127
LINC00668	KCTD11	-3.25	368	-0.17	-0.264, -0.066	0.00127
LINC00668	ZBTB40	3.24	368	0.17	0.066, 0.264	0.00128
LINC00668	LRP3	-3.25	368	-0.17	-0.264, -0.066	0.00128
LINC00668	SKIV2L	3.24	368	0.17	0.066, 0.264	0.0013
LINC00668	UBE2G1	-3.24	368	-0.17	-0.264, -0.066	0.0013
LINC00668	SLC25A33	3.24	368	0.17	0.066, 0.264	0.0013
LINC00668	RHOF	3.24	368	0.17	0.066, 0.264	0.00131
LINC00668	SLC25A29	-3.24	368	-0.17	-0.264, -0.066	0.00131
LINC00668	WDR4	3.24	368	0.17	0.066, 0.264	0.00131
LINC00668	PDCD10	3.24	368	0.17	0.066, 0.264	0.00131
LINC00668	TPRG1L	3.24	368	0.17	0.066, 0.264	0.00132
LINC00668	KIAA1211L	-3.24	368	-0.17	-0.264, -0.066	0.00132
LINC00668	ZNF728	3.24	368	0.17	0.065, 0.264	0.00133
LINC00668	GNA14	-3.23	368	-0.17	-0.264, -0.065	0.00134
LINC00668	FXR2	-3.23	368	-0.17	-0.263, -0.065	0.00135
LINC00668	EBNA1BP2	3.23	368	0.17	0.065, 0.264	0.00135
LINC00668	FLT4	-3.22	368	-0.17	-0.263, -0.065	0.00137
LINC00668	PLA2G5	-3.22	368	-0.17	-0.263, -0.065	0.00138
LINC00668	EIF4G1	3.22	368	0.17	0.065, 0.263	0.00138
LINC00668	CNGB3	3.22	368	0.17	0.065, 0.263	0.00138
LINC00668	CENPL	3.22	368	0.17	0.065, 0.263	0.00138
LINC00668	MED9	-3.22	368	-0.17	-0.263, -0.065	0.00139
LINC00668	UBA1	3.22	368	0.17	0.065, 0.263	0.00139
LINC00668	KBTBD11	-3.21	368	-0.17	-0.263, -0.064	0.00143
LINC00668	EFCAB6	-3.21	368	-0.17	-0.263, -0.064	0.00143
LINC00668	SNRK	-3.21	368	-0.17	-0.263, -0.064	0.00144
LINC00668	E2F6	3.21	368	0.16	0.064, 0.262	0.00146
LINC00668	KCNJ8	-3.21	368	-0.16	-0.262, -0.064	0.00146
LINC00668	SEC31B	-3.2	368	-0.16	-0.262, -0.064	0.00147
LINC00668	TPGS2	3.2	368	0.16	0.064, 0.262	0.00147
LINC00668	CSMD1	3.2	368	0.16	0.064, 0.262	0.00147
LINC00668	TUBB4B	3.2	368	0.16	0.064, 0.262	0.00148
LINC00668	SCO1	-3.2	368	-0.16	-0.262, -0.064	0.00148
LINC00668	USP19	3.2	368	0.16	0.064, 0.262	0.00149
LINC00668	CKAP5	3.2	368	0.16	0.064, 0.262	0.0015
LINC00668	NBPF4	3.2	368	0.16	0.064, 0.262	0.0015
LINC00668	DYNC1LI1	3.2	368	0.16	0.064, 0.262	0.0015
LINC00668	IRS2	-3.2	368	-0.16	-0.262, -0.063	0.00151
LINC00668	CKS2	3.19	368	0.16	0.063, 0.262	0.00153
LINC00668	SYBU	-3.19	368	-0.16	-0.262, -0.063	0.00153
LINC00668	C1RL	-3.19	368	-0.16	-0.262, -0.063	0.00153
LINC00668	PSMA7	3.19	368	0.16	0.063, 0.262	0.00154
LINC00668	YIF1B	3.19	368	0.16	0.063, 0.261	0.00156
LINC00668	NLRP2	3.19	368	0.16	0.063, 0.261	0.00157
LINC00668	DUSP26	3.18	368	0.16	0.063, 0.261	0.00157
LINC00668	ZNF730	3.18	368	0.16	0.063, 0.261	0.00157
LINC00668	WDR3	3.18	368	0.16	0.063, 0.261	0.00158
LINC00668	CLDN3	3.18	368	0.16	0.063, 0.261	0.00158
LINC00668	LYSMD4	3.18	368	0.16	0.063, 0.261	0.00158
LINC00668	ART5	3.18	368	0.16	0.063, 0.261	0.0016
LINC00668	HBE1	3.18	368	0.16	0.062, 0.261	0.00162
LINC00668	TOP2A	3.18	368	0.16	0.062, 0.261	0.00162
LINC00668	FAM83C	3.18	368	0.16	0.062, 0.261	0.00162
LINC00668	AWAT1	3.17	368	0.16	0.062, 0.261	0.00163
LINC00668	AKR1E2	3.17	368	0.16	0.062, 0.261	0.00163
LINC00668	TAPT1	-3.17	368	-0.16	-0.261, -0.062	0.00164
LINC00668	PSMD14	3.17	368	0.16	0.062, 0.261	0.00164
LINC00668	CCT2	3.17	368	0.16	0.062, 0.261	0.00166
LINC00668	METTL6	3.17	368	0.16	0.062, 0.261	0.00167
LINC00668	ZNF300	3.17	368	0.16	0.062, 0.26	0.00167
LINC00668	PWP2	3.17	368	0.16	0.062, 0.26	0.00167
LINC00668	FRAT2	3.17	368	0.16	0.062, 0.26	0.00167
LINC00668	ZYG11A	3.17	368	0.16	0.062, 0.26	0.00167
LINC00668	CENPE	3.17	368	0.16	0.062, 0.26	0.00168
LINC00668	ZSWIM5	3.17	368	0.16	0.062, 0.26	0.00168
LINC00668	QRSL1	3.17	368	0.16	0.062, 0.26	0.00168
LINC00668	PPP4R3CP	3.17	368	0.16	0.062, 0.26	0.00168
LINC00668	CLSPN	3.16	368	0.16	0.062, 0.26	0.00169
LINC00668	AGBL5	3.16	368	0.16	0.062, 0.26	0.00169
LINC00668	HNRNPR	3.16	368	0.16	0.062, 0.26	0.00169
LINC00668	POTEE	3.16	368	0.16	0.062, 0.26	0.00169
LINC00668	TLDC2	3.16	368	0.16	0.062, 0.26	0.0017
LINC00668	CAPN1	3.16	368	0.16	0.062, 0.26	0.0017
LINC00668	TMEM126A	3.16	368	0.16	0.062, 0.26	0.00171
LINC00668	PSMC2	3.16	368	0.16	0.061, 0.26	0.00172
LINC00668	SNX3	3.16	368	0.16	0.061, 0.26	0.00172
LINC00668	ZBTB43	-3.16	368	-0.16	-0.26, -0.061	0.00172
LINC00668	C11orf74	3.16	368	0.16	0.061, 0.26	0.00173
LINC00668	ADPRM	-3.16	368	-0.16	-0.26, -0.061	0.00173
LINC00668	ZNF443	-3.16	368	-0.16	-0.26, -0.061	0.00173
LINC00668	HNRNPA3	3.15	368	0.16	0.061, 0.26	0.00176
LINC00668	BCL6B	-3.15	368	-0.16	-0.259, -0.061	0.00179
LINC00668	CENPQ	3.15	368	0.16	0.061, 0.259	0.00179
LINC00668	EIF4G3	3.15	368	0.16	0.061, 0.259	0.00179
LINC00668	APOH	3.15	368	0.16	0.061, 0.26	0.00179
LINC00668	PPP1CC	3.15	368	0.16	0.061, 0.259	0.00179
LINC00668	SLC41A3	3.14	368	0.16	0.061, 0.259	0.00181
LINC00668	DOCK7	3.14	368	0.16	0.061, 0.259	0.00181
LINC00668	DCP2	3.14	368	0.16	0.061, 0.259	0.00182
LINC00668	GPR157	3.14	368	0.16	0.061, 0.259	0.00182
LINC00668	HP1BP3	3.14	368	0.16	0.06, 0.26	0.00184
LINC00668	ZNF800	-3.14	368	-0.16	-0.26, -0.06	0.00185
LINC00668	FOXJ2	-3.13	368	-0.16	-0.26, -0.06	0.00186
LINC00668	DNAJC11	3.13	368	0.16	0.06, 0.26	0.00186
LINC00668	PHB	3.13	368	0.16	0.06, 0.26	0.00186
LINC00668	ELOVL1	3.13	368	0.16	0.06, 0.26	0.00187
LINC00668	CDKL4	3.13	368	0.16	0.06, 0.26	0.00187
LINC00668	EFCC1	-3.13	368	-0.16	-0.26, -0.06	0.00187
LINC00668	SLC25A16	-3.13	368	-0.16	-0.26, -0.06	0.00188
LINC00668	C8orf44	3.13	368	0.16	0.06, 0.26	0.00188
LINC00668	CDADC1	-3.13	368	-0.16	-0.26, -0.06	0.0019
LINC00668	LTV1	3.13	368	0.16	0.06, 0.26	0.00191
LINC00668	PAFAH1B1	-3.13	368	-0.16	-0.26, -0.06	0.00191
LINC00668	RMI2	3.12	368	0.16	0.06, 0.26	0.00194
LINC00668	ARHGEF15	-3.12	368	-0.16	-0.258, -0.059	0.00196
LINC00668	SERPINF1	-3.12	368	-0.16	-0.26, -0.06	0.00196
LINC00668	SHPK	-3.12	368	-0.16	-0.258, -0.059	0.00196
LINC00668	RPL10L	3.12	368	0.16	0.059, 0.258	0.00197
LINC00668	ASGR1	-3.12	368	-0.16	-0.258, -0.059	0.00197
LINC00668	PSMA4	3.12	368	0.16	0.059, 0.258	0.00198
LINC00668	AP3S2	-3.12	368	-0.16	-0.258, -0.059	0.00198
LINC00668	HEBP1	-3.11	368	-0.16	-0.258, -0.059	0.00199
LINC00668	ASCC3	3.11	368	0.16	0.059, 0.258	0.00199
LINC00668	EIF6	3.11	368	0.16	0.059, 0.258	0.002
LINC00668	ESAM	-3.11	368	-0.16	-0.258, -0.059	0.002
LINC00668	TIGD1	3.11	368	0.16	0.059, 0.258	0.002
LINC00668	USP1	3.11	368	0.16	0.059, 0.258	0.00201
LINC00668	MRPL18	3.11	368	0.16	0.059, 0.258	0.00202
LINC00668	NEUROD1	3.11	368	0.16	0.059, 0.258	0.00202
LINC00668	NDST4	3.11	368	0.16	0.059, 0.258	0.00203
LINC00668	USP14	3.11	368	0.16	0.059, 0.258	0.00203
LINC00668	NLRP4	3.11	368	0.16	0.059, 0.258	0.00203
LINC00668	RAD54B	3.11	368	0.16	0.059, 0.258	0.00204
LINC00668	XKR8	3.1	368	0.16	0.059, 0.258	0.00205
LINC00668	PGM3	3.1	368	0.16	0.059, 0.257	0.00206
LINC00668	IER2	-3.1	368	-0.16	-0.257, -0.059	0.00206
LINC00668	BMX	-3.1	368	-0.16	-0.257, -0.059	0.00207
LINC00668	ZNF433	-3.1	368	-0.16	-0.257, -0.059	0.00208
LINC00668	FAM20C	-3.1	368	-0.16	-0.257, -0.059	0.00208
LINC00668	ATAD3B	3.1	368	0.16	0.059, 0.257	0.00209
LINC00668	SLC44A5	3.1	368	0.16	0.058, 0.257	0.0021
LINC00668	PTCH1	-3.1	368	-0.16	-0.257, -0.058	0.0021
LINC00668	AAMP	3.1	368	0.16	0.058, 0.257	0.00211
LINC00668	FBXO5	3.09	368	0.16	0.058, 0.257	0.00212
LINC00668	MTMR2	3.09	368	0.16	0.058, 0.257	0.00214
LINC00668	LCN6	-3.09	368	-0.16	-0.257, -0.058	0.00214
LINC00668	PIGT	3.09	368	0.16	0.058, 0.257	0.00214
LINC00668	ZNF525	3.09	368	0.16	0.058, 0.257	0.00216
LINC00668	FAM185A	-3.09	368	-0.16	-0.257, -0.058	0.00217
LINC00668	NAP1L2	3.09	368	0.16	0.058, 0.257	0.00217
LINC00668	ARAP3	-3.09	368	-0.16	-0.257, -0.058	0.00217
LINC00668	GLOD4	-3.09	368	-0.16	-0.257, -0.058	0.00217
LINC00668	MDGA2	3.09	368	0.16	0.058, 0.257	0.00218
LINC00668	ACADVL	-3.08	368	-0.16	-0.256, -0.058	0.0022
LINC00668	43164	-3.08	368	-0.16	-0.256, -0.058	0.0022
LINC00668	RBM46	3.08	368	0.16	0.058, 0.256	0.00222
LINC00668	TMEM88	-3.08	368	-0.16	-0.256, -0.057	0.00223
LINC00668	NOP58	3.08	368	0.16	0.057, 0.256	0.00224
LINC00668	TAF1B	3.08	368	0.16	0.057, 0.256	0.00224
LINC00668	TSG101	3.08	368	0.16	0.057, 0.256	0.00225
LINC00668	NHLRC2	-3.08	368	-0.16	-0.256, -0.057	0.00225
LINC00668	CHTF18	3.08	368	0.16	0.057, 0.256	0.00226
LINC00668	ANAPC16	-3.07	368	-0.16	-0.256, -0.057	0.00226
LINC00668	ATAD5	3.07	368	0.16	0.057, 0.256	0.00228
LINC00668	BCL2L12	3.07	368	0.16	0.057, 0.256	0.0023
LINC00668	CSNK1D	3.07	368	0.16	0.057, 0.256	0.00231
LINC00668	C1orf52	3.07	368	0.16	0.057, 0.256	0.00231
LINC00668	FARSB	3.07	368	0.16	0.057, 0.256	0.00233
LINC00668	SRSF12	3.06	368	0.16	0.057, 0.256	0.00235
LINC00668	SLC26A11	3.06	368	0.16	0.057, 0.255	0.00237
LINC00668	RNF167	-3.06	368	-0.16	-0.255, -0.056	0.00238
LINC00668	MCM7	3.06	368	0.16	0.056, 0.255	0.00241
LINC00668	EAF2	3.06	368	0.16	0.056, 0.255	0.00241
LINC00668	C5orf30	3.05	368	0.16	0.056, 0.255	0.00242
LINC00668	TMEM14B	3.05	368	0.16	0.056, 0.255	0.00242
LINC00668	SMAP2	3.05	368	0.16	0.056, 0.255	0.00242
LINC00668	WBP1L	-3.05	368	-0.16	-0.255, -0.056	0.00242
LINC00668	UBE2Q2	3.05	368	0.16	0.056, 0.255	0.00243
LINC00668	SLC1A3	3.05	368	0.16	0.056, 0.255	0.00243
LINC00668	ZNF554	-3.05	368	-0.16	-0.255, -0.056	0.00244
LINC00668	RNF7	3.05	368	0.16	0.056, 0.255	0.00245
LINC00668	HACL1	3.05	368	0.16	0.056, 0.255	0.00245
LINC00668	C1orf109	3.05	368	0.16	0.056, 0.255	0.00246
LINC00668	MYO18B	3.05	368	0.16	0.056, 0.255	0.00246
LINC00668	CENPM	3.05	368	0.16	0.056, 0.255	0.00246
LINC00668	RFX2	3.05	368	0.16	0.056, 0.255	0.00248
LINC00668	CC2D2B	-3.05	368	-0.16	-0.255, -0.056	0.00248
LINC00668	FIG4	3.05	368	0.16	0.056, 0.255	0.00248
LINC00668	ZNF488	3.05	368	0.16	0.056, 0.255	0.00248
LINC00668	CLEC14A	-3.05	368	-0.16	-0.255, -0.056	0.00249
LINC00668	UGT2B28	3.04	368	0.16	0.056, 0.255	0.0025
LINC00668	TAL1	-3.04	368	-0.16	-0.255, -0.056	0.00252
LINC00668	XRCC2	3.04	368	0.16	0.056, 0.255	0.00252
LINC00668	UNC45A	3.04	368	0.16	0.055, 0.254	0.00253
LINC00668	TYK2	-3.04	368	-0.16	-0.254, -0.055	0.00253
LINC00668	PSMD11	3.04	368	0.16	0.055, 0.254	0.00254
LINC00668	FAM110A	3.04	368	0.16	0.055, 0.254	0.00255
LINC00668	ENG	-3.04	368	-0.16	-0.254, -0.055	0.00255
LINC00668	FAM167B	-3.04	368	-0.16	-0.254, -0.055	0.00257
LINC00668	NOVA2	-3.04	368	-0.16	-0.254, -0.055	0.00257
LINC00668	DNPEP	3.03	368	0.16	0.055, 0.254	0.00258
LINC00668	SAT2	-3.03	368	-0.16	-0.254, -0.055	0.00259
LINC00668	MMRN2	-3.03	368	-0.16	-0.254, -0.055	0.0026
LINC00668	TMEM234	3.03	368	0.16	0.055, 0.254	0.00261
LINC00668	CIPC	-3.03	368	-0.16	-0.254, -0.055	0.00261
LINC00668	RAB14	-3.03	368	-0.16	-0.254, -0.055	0.00261
LINC00668	ECT2	3.03	368	0.16	0.055, 0.254	0.00261
LINC00668	CT45A1	3.03	368	0.16	0.055, 0.254	0.00261
LINC00668	DHH	-3.03	368	-0.16	-0.254, -0.055	0.00263
LINC00668	OR2C3	3.03	368	0.16	0.055, 0.254	0.00263
LINC00668	DNASE1L3	-3.03	368	-0.16	-0.254, -0.055	0.00264
LINC00668	ZNF600	3.03	368	0.16	0.055, 0.254	0.00264
LINC00668	AVPI1	-3.02	368	-0.16	-0.254, -0.055	0.00267
LINC00668	TKTL2	3.02	368	0.16	0.055, 0.254	0.00268
LINC00668	FSTL5	3.02	368	0.16	0.055, 0.254	0.00268
LINC00668	CCDC77	3.02	368	0.16	0.055, 0.254	0.00269
LINC00668	KHNYN	3.02	368	0.16	0.054, 0.253	0.0027
LINC00668	SOX12	3.02	368	0.16	0.054, 0.253	0.00272
LINC00668	SOX17	-3.01	368	-0.16	-0.253, -0.054	0.00275
LINC00668	PRDX2	-3.02	368	-0.16	-0.253, -0.054	0.00275
LINC00668	NDN	3.01	368	0.16	0.054, 0.253	0.00276
LINC00668	ITLN1	3.01	368	0.16	0.054, 0.253	0.00278
LINC00668	FDFT1	3.01	368	0.16	0.054, 0.253	0.00279
LINC00668	PRELID2	3.01	368	0.16	0.054, 0.253	0.00279
LINC00668	MX2	3.01	368	0.16	0.054, 0.253	0.00279
LINC00668	TSKS	3.01	368	0.16	0.054, 0.253	0.00279
LINC00668	SGK1	-3.01	368	-0.16	-0.253, -0.054	0.00279
LINC00668	PRAMEF27	3.01	368	0.15	0.054, 0.253	0.0028
LINC00668	LARS	3.01	368	0.15	0.054, 0.253	0.0028
LINC00668	CD34	-3.01	368	-0.15	-0.253, -0.054	0.00281
LINC00668	PLEKHM2	3.01	368	0.15	0.054, 0.253	0.00281
LINC00668	PCDH12	-3.01	368	-0.15	-0.253, -0.054	0.00283
LINC00668	MINDY3	-3	368	-0.15	-0.253, -0.054	0.00285
LINC00668	CSPG5	3	368	0.15	0.054, 0.253	0.00286
LINC00668	MOV10	3	368	0.15	0.054, 0.253	0.00286
LINC00668	BAG1	-3	368	-0.15	-0.253, -0.053	0.00287
LINC00668	PSMD13	3	368	0.15	0.053, 0.252	0.00289
LINC00668	ZNF215	3	368	0.15	0.053, 0.252	0.0029
LINC00668	ZNF837	-3	368	-0.15	-0.252, -0.053	0.0029
LINC00668	PPP5D1	-3	368	-0.15	-0.252, -0.053	0.0029
LINC00668	SELENOO	-3	368	-0.15	-0.252, -0.053	0.00291
LINC00668	ZNF440	-3	368	-0.15	-0.252, -0.053	0.00292
LINC00668	PLSCR2	2.99	368	0.15	0.053, 0.252	0.00293
LINC00668	IMPDH1	2.99	368	0.15	0.053, 0.252	0.00295
LINC00668	MCM6	2.99	368	0.15	0.053, 0.252	0.00295
LINC00668	RBM19	2.99	368	0.15	0.053, 0.252	0.00295
LINC00668	ESCO2	2.99	368	0.15	0.053, 0.252	0.00295
LINC00668	ZNF560	2.99	368	0.15	0.053, 0.252	0.00295
LINC00668	TMEM204	-2.99	368	-0.15	-0.252, -0.053	0.00296
LINC00668	ACOT7	2.99	368	0.15	0.053, 0.252	0.00297
LINC00668	RERGL	2.99	368	0.15	0.053, 0.252	0.003
LINC00668	ATPIF1	2.99	368	0.15	0.053, 0.252	0.00301
LINC00668	ERCC5	-2.99	368	-0.15	-0.252, -0.053	0.00302
LINC00668	JUNB	-2.98	368	-0.15	-0.252, -0.052	0.00305
LINC00668	TTF2	2.98	368	0.15	0.052, 0.252	0.00307
LINC00668	THAP9	-2.98	368	-0.15	-0.251, -0.052	0.0031
LINC00668	ZNF391	2.98	368	0.15	0.052, 0.251	0.00311
LINC00668	ASPM	2.97	368	0.15	0.052, 0.251	0.00313
LINC00668	FAM149B1	-2.97	368	-0.15	-0.251, -0.052	0.00313
LINC00668	PRIMPOL	2.97	368	0.15	0.052, 0.251	0.00314
LINC00668	QTRT1	-2.97	368	-0.15	-0.251, -0.052	0.00314
LINC00668	YBX2	2.97	368	0.15	0.052, 0.251	0.00314
LINC00668	AKR1A1	2.97	368	0.15	0.052, 0.251	0.00316
LINC00668	ACTN3	2.97	368	0.15	0.052, 0.251	0.00317
LINC00668	KIF2A	2.97	368	0.15	0.052, 0.251	0.0032
LINC00668	SUCLA2	-2.96	368	-0.15	-0.251, -0.052	0.00323
LINC00668	INTS8	2.96	368	0.15	0.052, 0.251	0.00323
LINC00668	TOM1L2	-2.96	368	-0.15	-0.251, -0.051	0.00325
LINC00668	SMARCA2	-2.96	368	-0.15	-0.251, -0.051	0.00326
LINC00668	C22orf15	2.96	368	0.15	0.051, 0.251	0.00328
LINC00668	ATG9A	2.96	368	0.15	0.051, 0.251	0.00328
LINC00668	BID	2.96	368	0.15	0.051, 0.25	0.00329
LINC00668	TIE1	-2.96	368	-0.15	-0.25, -0.051	0.0033
LINC00668	S100A10	2.96	368	0.15	0.051, 0.25	0.0033
LINC00668	C11orf95	-2.96	368	-0.15	-0.25, -0.051	0.0033
LINC00668	ADGRF5	-2.96	368	-0.15	-0.25, -0.051	0.00331
LINC00668	C17orf53	2.96	368	0.15	0.051, 0.25	0.00332
LINC00668	EEF1AKMT2	-2.96	368	-0.15	-0.25, -0.051	0.00332
LINC00668	KIF18B	2.95	368	0.15	0.051, 0.25	0.00333
LINC00668	CNBP	2.95	368	0.15	0.051, 0.25	0.00334
LINC00668	KCNAB1	-2.95	368	-0.15	-0.25, -0.051	0.00336
LINC00668	AMZ2	2.95	368	0.15	0.051, 0.25	0.00336
LINC00668	GABRA2	2.95	368	0.15	0.051, 0.25	0.00339
LINC00668	DBF4B	2.95	368	0.15	0.051, 0.25	0.00339
LINC00668	PCBP1	2.95	368	0.15	0.051, 0.25	0.00341
LINC00668	TSNAXIP1	-2.94	368	-0.15	-0.25, -0.051	0.00344
LINC00668	AL121758.1	2.94	368	0.15	0.05, 0.25	0.00345
LINC00668	AP4B1	2.94	368	0.15	0.05, 0.25	0.00345
LINC00668	ZCCHC9	2.94	368	0.15	0.05, 0.25	0.00347
LINC00668	FEN1	2.94	368	0.15	0.05, 0.25	0.00347
LINC00668	ST3GAL6	-2.94	368	-0.15	-0.25, -0.05	0.00347
LINC00668	INTS4	2.94	368	0.15	0.05, 0.25	0.00349
LINC00668	RNF34	2.94	368	0.15	0.05, 0.25	0.00351
LINC00668	RPS7	2.94	368	0.15	0.05, 0.25	0.00352
LINC00668	COPA	2.94	368	0.15	0.05, 0.25	0.00354
LINC00668	MAP2K7	-2.93	368	-0.15	-0.25, -0.05	0.00355
LINC00668	PROZ	-2.93	368	-0.15	-0.25, -0.05	0.00355
LINC00668	PHF2	-2.93	368	-0.15	-0.25, -0.05	0.00356
LINC00668	RUVBL2	2.93	368	0.15	0.05, 0.25	0.00357
LINC00668	EML1	-2.93	368	-0.15	-0.25, -0.05	0.00358
LINC00668	HTATSF1	2.93	368	0.15	0.05, 0.25	0.00358
LINC00668	UPK1B	2.93	368	0.15	0.05, 0.25	0.00359
LINC00668	KLHL32	2.93	368	0.15	0.05, 0.25	0.00361
LINC00668	CAPN11	-2.93	368	-0.15	-0.25, -0.05	0.00361
LINC00668	CENPN	2.93	368	0.15	0.05, 0.25	0.00362
LINC00668	FAM20A	-2.93	368	-0.15	-0.25, -0.05	0.00363
LINC00668	RAMP2	-2.93	368	-0.15	-0.25, -0.05	0.00363
LINC00668	TARDBP	2.93	368	0.15	0.05, 0.25	0.00363
LINC00668	CDH5	-2.93	368	-0.15	-0.25, -0.05	0.00365
LINC00668	HINFP	2.92	368	0.15	0.05, 0.25	0.00367
LINC00668	PERP	2.92	368	0.15	0.049, 0.249	0.00367
LINC00668	ARHGEF19	2.92	368	0.15	0.049, 0.249	0.00367
LINC00668	MORF4L1	2.92	368	0.15	0.049, 0.249	0.00367
LINC00668	UBE2H	-2.92	368	-0.15	-0.25, -0.05	0.00367
LINC00668	MTF2	2.92	368	0.15	0.049, 0.249	0.00369
LINC00668	TNPO2	-2.92	368	-0.15	-0.249, -0.049	0.0037
LINC00668	SHH	-2.92	368	-0.15	-0.249, -0.049	0.00371
LINC00668	KLK15	2.92	368	0.15	0.049, 0.249	0.00371
LINC00668	TLR6	2.92	368	0.15	0.049, 0.249	0.00374
LINC00668	REXO5	2.92	368	0.15	0.049, 0.248	0.00375
LINC00668	KAT6B	-2.92	368	-0.15	-0.248, -0.049	0.00376
LINC00668	PTBP2	2.92	368	0.15	0.049, 0.248	0.00376
LINC00668	LINC00959	-2.92	368	-0.15	-0.248, -0.049	0.00377
LINC00668	MFN1	2.91	368	0.15	0.049, 0.248	0.00378
LINC00668	EIF5	-2.91	368	-0.15	-0.248, -0.049	0.00379
LINC00668	NOTCH4	-2.91	368	-0.15	-0.248, -0.049	0.00379
LINC00668	SNX14	2.91	368	0.15	0.049, 0.248	0.00381
LINC00668	E2F8	2.91	368	0.15	0.049, 0.248	0.00383
LINC00668	THBS3	-2.91	368	-0.15	-0.248, -0.049	0.00383
LINC00668	FGFR1OP	2.91	368	0.15	0.049, 0.248	0.00384
LINC00668	DFNB59	-2.91	368	-0.15	-0.248, -0.049	0.00384
LINC00668	RPL22	2.91	368	0.15	0.049, 0.248	0.00387
LINC00668	ASGR2	-2.91	368	-0.15	-0.248, -0.049	0.00388
LINC00668	RANBP6	-2.9	368	-0.15	-0.248, -0.049	0.0039
LINC00668	SPERT	2.9	368	0.15	0.048, 0.248	0.00391
LINC00668	PRPF6	2.9	368	0.15	0.048, 0.248	0.00392
LINC00668	ZNF468	2.9	368	0.15	0.048, 0.248	0.00392
LINC00668	RBAK-RBAKDN	-2.9	368	-0.15	-0.248, -0.048	0.00392
LINC00668	NDE1	2.9	368	0.15	0.048, 0.248	0.00393
LINC00668	RPAP3	2.9	368	0.15	0.048, 0.248	0.00395
LINC00668	COPG1	2.9	368	0.15	0.048, 0.248	0.00395
LINC00668	TNKS2	-2.9	368	-0.15	-0.248, -0.048	0.00396
LINC00668	PLAC1	2.9	368	0.15	0.048, 0.248	0.00396
LINC00668	EFNB2	-2.9	368	-0.15	-0.248, -0.048	0.00397
LINC00668	FAM217B	2.9	368	0.15	0.048, 0.248	0.00397
LINC00668	SF3B3	2.9	368	0.15	0.048, 0.248	0.00398
LINC00668	CEP152	2.9	368	0.15	0.048, 0.248	0.00399
LINC00668	TMEM256-PLSCR3	-2.9	368	-0.15	-0.247, -0.048	0.004
LINC00668	MED30	2.9	368	0.15	0.048, 0.247	0.00401
LINC00668	RNASEK	-2.89	368	-0.15	-0.247, -0.048	0.00403
LINC00668	CAMK2N1	2.89	368	0.15	0.048, 0.247	0.00404
LINC00668	ZIC1	2.89	368	0.15	0.048, 0.247	0.00405
LINC00668	CDK18	2.89	368	0.15	0.048, 0.247	0.00406
LINC00668	CETN1	2.89	368	0.15	0.048, 0.247	0.00406
LINC00668	C17orf97	-2.89	368	-0.15	-0.247, -0.048	0.00407
LINC00668	SLCO6A1	2.89	368	0.15	0.048, 0.247	0.00408
LINC00668	BAG2	2.89	368	0.15	0.048, 0.247	0.00409
LINC00668	USP24	2.89	368	0.15	0.048, 0.247	0.00409
LINC00668	FAAP24	2.89	368	0.15	0.048, 0.247	0.00409
LINC00668	MUM1	-2.89	368	-0.15	-0.247, -0.048	0.00411
LINC00668	VCX	2.89	368	0.15	0.048, 0.247	0.00412
LINC00668	ZCCHC24	-2.89	368	-0.15	-0.247, -0.048	0.00412
LINC00668	CLK4	-2.89	368	-0.15	-0.247, -0.047	0.00414
LINC00668	ARHGEF39	2.88	368	0.15	0.047, 0.247	0.00415
LINC00668	FBP1	-2.88	368	-0.15	-0.247, -0.047	0.00417
LINC00668	CD40	2.88	368	0.15	0.047, 0.247	0.00417
LINC00668	ADA	2.88	368	0.15	0.047, 0.247	0.00418
LINC00668	PTPRB	-2.88	368	-0.15	-0.247, -0.047	0.00418
LINC00668	ANO5	2.88	368	0.15	0.047, 0.247	0.0042
LINC00668	SPRY2	-2.88	368	-0.15	-0.247, -0.047	0.00421
LINC00668	TXNDC11	2.88	368	0.15	0.047, 0.247	0.00421
LINC00668	LDB3	-2.88	368	-0.15	-0.246, -0.047	0.00427
LINC00668	COA7	2.87	368	0.15	0.047, 0.246	0.0043
LINC00668	RFFL	2.87	368	0.15	0.047, 0.246	0.0043
LINC00668	TCEAL7	-2.87	368	-0.15	-0.246, -0.047	0.00434
LINC00668	PLVAP	-2.87	368	-0.15	-0.246, -0.047	0.00435
LINC00668	MTMR6	-2.87	368	-0.15	-0.246, -0.047	0.00435
LINC00668	LSG1	2.87	368	0.15	0.047, 0.246	0.00435
LINC00668	MTOR	2.87	368	0.15	0.047, 0.246	0.00435
LINC00668	S100PBP	2.87	368	0.15	0.047, 0.246	0.00435
LINC00668	SOHLH1	2.87	368	0.15	0.047, 0.246	0.00437
LINC00668	FAS	-2.87	368	-0.15	-0.246, -0.047	0.00437
LINC00668	SLC50A1	2.87	368	0.15	0.047, 0.246	0.00437
LINC00668	LRCH3	2.87	368	0.15	0.047, 0.246	0.00439
LINC00668	XPO1	2.87	368	0.15	0.046, 0.246	0.0044
LINC00668	SOX7	-2.86	368	-0.15	-0.246, -0.046	0.00441
LINC00668	EYA3	2.86	368	0.15	0.046, 0.246	0.00441
LINC00668	PPCS	2.86	368	0.15	0.046, 0.246	0.00443
LINC00668	NELL2	2.86	368	0.15	0.046, 0.246	0.00444
LINC00668	GNA11	-2.86	368	-0.15	-0.246, -0.046	0.00445
LINC00668	GNRH2	2.86	368	0.15	0.046, 0.246	0.00445
LINC00668	MAGEB17	2.86	368	0.15	0.046, 0.246	0.00445
LINC00668	ZZEF1	-2.86	368	-0.15	-0.246, -0.046	0.00446
LINC00668	SLC13A5	-2.86	368	-0.15	-0.246, -0.046	0.00453
LINC00668	ITFG2	-2.86	368	-0.15	-0.246, -0.046	0.00453
LINC00668	NUTM2F	-2.86	368	-0.15	-0.246, -0.046	0.00453
LINC00668	AK6	2.86	368	0.15	0.046, 0.246	0.00454
LINC00668	TRMT13	2.85	368	0.15	0.046, 0.245	0.00458
LINC00668	ACTL6A	2.85	368	0.15	0.046, 0.245	0.00459
LINC00668	MRPS23	2.85	368	0.15	0.046, 0.245	0.00459
LINC00668	SMOC1	-2.85	368	-0.15	-0.245, -0.046	0.0046
LINC00668	HNRNPA2B1	2.85	368	0.15	0.046, 0.245	0.00461
LINC00668	STARD3NL	2.85	368	0.15	0.046, 0.245	0.00462
LINC00668	PRDX5	2.85	368	0.15	0.046, 0.245	0.00462
LINC00668	CFAP45	2.85	368	0.15	0.046, 0.245	0.00464
LINC00668	RUFY2	-2.85	368	-0.15	-0.245, -0.046	0.00465
LINC00668	TSPY3	2.85	368	0.15	0.046, 0.245	0.00465
LINC00668	AUH	-2.85	368	-0.15	-0.245, -0.046	0.00467
LINC00668	BTG3	2.85	368	0.15	0.045, 0.245	0.00467
LINC00668	ZNF627	-2.85	368	-0.15	-0.245, -0.045	0.00468
LINC00668	AQP10	2.85	368	0.15	0.045, 0.245	0.00468
LINC00668	CHRM3	2.84	368	0.15	0.045, 0.245	0.0047
LINC00668	ZNF425	-2.84	368	-0.15	-0.245, -0.045	0.0047
LINC00668	TRIM21	2.84	368	0.15	0.045, 0.245	0.0047
LINC00668	RBM12B	2.84	368	0.15	0.045, 0.245	0.0047
LINC00668	MKRN2	2.84	368	0.15	0.045, 0.245	0.00471
LINC00668	ECE2	2.84	368	0.15	0.045, 0.245	0.00473
LINC00668	GPR4	-2.84	368	-0.15	-0.245, -0.045	0.00476
LINC00668	CDKN3	2.84	368	0.15	0.045, 0.245	0.00478
LINC00668	TBCCD1	2.84	368	0.15	0.045, 0.245	0.00479
LINC00668	PHF14	2.84	368	0.15	0.045, 0.245	0.00479
LINC00668	CDC6	2.84	368	0.15	0.045, 0.245	0.00481
LINC00668	ORC4	2.84	368	0.15	0.045, 0.245	0.00482
LINC00668	SSRP1	2.84	368	0.15	0.045, 0.245	0.00482
LINC00668	AURKAIP1	2.83	368	0.15	0.045, 0.245	0.00484
LINC00668	LDB2	-2.83	368	-0.15	-0.244, -0.045	0.00485
LINC00668	RPUSD3	2.83	368	0.15	0.045, 0.244	0.00486
LINC00668	MZT1	2.83	368	0.15	0.045, 0.244	0.00487
LINC00668	FAM136A	2.83	368	0.15	0.045, 0.244	0.00487
LINC00668	P2RX5-TAX1BP3	-2.83	368	-0.15	-0.244, -0.045	0.00493
LINC00668	SYF2	2.83	368	0.15	0.045, 0.244	0.00493
LINC00668	IMPA2	2.83	368	0.15	0.045, 0.244	0.00495
LINC00668	TTC26	2.83	368	0.15	0.045, 0.244	0.00495
LINC00668	SSB	2.83	368	0.15	0.045, 0.244	0.00495
LINC00668	SPAG6	2.83	368	0.15	0.045, 0.244	0.00495
LINC00668	AKIRIN2	2.82	368	0.15	0.044, 0.244	0.00499
LINC00668	CD109	2.82	368	0.15	0.044, 0.244	0.005
LINC00668	MPDU1	-2.82	368	-0.15	-0.244, -0.044	0.00501
LINC00668	HELB	2.82	368	0.15	0.044, 0.244	0.00502
LINC00668	TMOD3	2.82	368	0.15	0.044, 0.244	0.00503
LINC00668	ANXA7	-2.82	368	-0.15	-0.244, -0.044	0.00503
LINC00668	UBE2O	2.82	368	0.15	0.044, 0.244	0.00503
LINC00668	SLC25A11	-2.82	368	-0.15	-0.244, -0.044	0.00503
LINC00668	NUS1	2.82	368	0.15	0.044, 0.244	0.00503
LINC00668	PSMA1	2.82	368	0.15	0.044, 0.244	0.00504
LINC00668	METTL5	2.82	368	0.15	0.044, 0.244	0.00507
LINC00668	CCDC168	-2.82	368	-0.15	-0.244, -0.044	0.00509
LINC00668	TROAP	2.82	368	0.15	0.044, 0.244	0.00509
LINC00668	ATP5F1	2.82	368	0.15	0.044, 0.244	0.0051
LINC00668	CMSS1	2.82	368	0.15	0.044, 0.244	0.00512
LINC00668	USP33	2.82	368	0.15	0.044, 0.244	0.00513
LINC00668	DOCK6	-2.82	368	-0.15	-0.244, -0.044	0.00513
LINC00668	MARCKS	2.81	368	0.15	0.044, 0.244	0.00514
LINC00668	HADH	-2.81	368	-0.15	-0.244, -0.044	0.00514
LINC00668	H2BFWT	2.81	368	0.15	0.044, 0.244	0.00515
LINC00668	CDT1	2.81	368	0.15	0.044, 0.243	0.00517
LINC00668	DCAF8	-2.81	368	-0.14	-0.243, -0.044	0.0052
LINC00668	ZBTB21	-2.81	368	-0.14	-0.243, -0.044	0.00523
LINC00668	FTCD	-2.81	368	-0.14	-0.243, -0.044	0.00524
LINC00668	STX1B	-2.81	368	-0.14	-0.243, -0.044	0.00524
LINC00668	CREBL2	-2.81	368	-0.14	-0.243, -0.043	0.00528
LINC00668	DDX20	2.81	368	0.14	0.043, 0.243	0.00528
LINC00668	MIS18A	2.8	368	0.14	0.043, 0.243	0.0053
LINC00668	FTSJ3	2.81	368	0.14	0.043, 0.243	0.0053
LINC00668	SVBP	2.8	368	0.14	0.043, 0.243	0.0053
LINC00668	ARL15	-2.8	368	-0.14	-0.243, -0.043	0.00531
LINC00668	STARD13	-2.8	368	-0.14	-0.243, -0.043	0.00532
LINC00668	KIAA2026	-2.8	368	-0.14	-0.243, -0.043	0.00535
LINC00668	C3orf36	-2.8	368	-0.14	-0.243, -0.043	0.00536
LINC00668	TTLL10	-2.8	368	-0.14	-0.243, -0.043	0.00536
LINC00668	RNF112	-2.8	368	-0.14	-0.243, -0.043	0.00536
LINC00668	TBC1D30	2.8	368	0.14	0.043, 0.243	0.00538
LINC00668	MRPL3	2.8	368	0.14	0.043, 0.243	0.00538
LINC00668	MKRN3	2.8	368	0.14	0.043, 0.243	0.00539
LINC00668	EZH2	2.8	368	0.14	0.043, 0.243	0.00539
LINC00668	KIF1B	2.8	368	0.14	0.043, 0.243	0.00541
LINC00668	RUFY1	2.8	368	0.14	0.043, 0.243	0.00543
LINC00668	LDHA	2.8	368	0.14	0.043, 0.243	0.00544
LINC00668	VAX1	2.8	368	0.14	0.043, 0.243	0.00545
LINC00668	ISCU	-2.8	368	-0.14	-0.243, -0.043	0.00546
LINC00668	FOPNL	2.79	368	0.14	0.043, 0.243	0.00548
LINC00668	XRCC4	2.79	368	0.14	0.043, 0.242	0.0055
LINC00668	MSH2	2.79	368	0.14	0.043, 0.242	0.00551
LINC00668	FAM72C	2.79	368	0.14	0.043, 0.242	0.00551
LINC00668	PSMC3	2.79	368	0.14	0.043, 0.242	0.00551
LINC00668	GPAT2	2.79	368	0.14	0.043, 0.242	0.00551
LINC00668	RPAP2	2.79	368	0.14	0.043, 0.242	0.00551
LINC00668	CCDC137	2.79	368	0.14	0.043, 0.242	0.00552
LINC00668	SH2D3C	-2.79	368	-0.14	-0.242, -0.043	0.00554
LINC00668	BEX1	2.79	368	0.14	0.043, 0.242	0.00554
LINC00668	UBAP1	-2.79	368	-0.14	-0.242, -0.043	0.00557
LINC00668	NCAPD2	2.79	368	0.14	0.043, 0.242	0.00557
LINC00668	SLC25A23	-2.79	368	-0.14	-0.242, -0.042	0.00559
LINC00668	GRAP	-2.79	368	-0.14	-0.242, -0.042	0.0056
LINC00668	SHOC2	-2.79	368	-0.14	-0.242, -0.042	0.00562
LINC00668	TAL2	2.78	368	0.14	0.042, 0.242	0.00563
LINC00668	SNAPC3	-2.79	368	-0.14	-0.242, -0.042	0.00563
LINC00668	LPAR4	-2.78	368	-0.14	-0.242, -0.042	0.00563
LINC00668	PPP1R3E	-2.78	368	-0.14	-0.242, -0.042	0.00568
LINC00668	OLA1	2.78	368	0.14	0.042, 0.242	0.00569
LINC00668	BHMG1	2.78	368	0.14	0.042, 0.242	0.00569
LINC00668	DHX37	2.78	368	0.14	0.042, 0.242	0.00571
LINC00668	ZNF727	2.78	368	0.14	0.042, 0.242	0.00571
LINC00668	TMEM50A	2.78	368	0.14	0.042, 0.242	0.00571
LINC00668	TGM3	2.78	368	0.14	0.042, 0.242	0.00572
LINC00668	OTX2	2.78	368	0.14	0.042, 0.242	0.00572
LINC00668	SLC25A19	2.78	368	0.14	0.042, 0.242	0.00573
LINC00668	FXR1	2.78	368	0.14	0.042, 0.242	0.00575
LINC00668	TBX15	2.78	368	0.14	0.042, 0.242	0.00577
LINC00668	HSPA12B	-2.78	368	-0.14	-0.242, -0.042	0.00578
LINC00668	TBCK	-2.78	368	-0.14	-0.242, -0.042	0.00579
LINC00668	GDF7	-2.78	368	-0.14	-0.242, -0.042	0.00579
LINC00668	KDM6B	-2.78	368	-0.14	-0.242, -0.042	0.0058
LINC00668	GALNT16	-2.77	368	-0.14	-0.242, -0.042	0.00582
LINC00668	TGFBR2	-2.77	368	-0.14	-0.241, -0.042	0.00584
LINC00668	SHROOM4	-2.77	368	-0.14	-0.241, -0.042	0.00584
LINC00668	RPN1	2.77	368	0.14	0.042, 0.241	0.00585
LINC00668	OSGIN1	2.77	368	0.14	0.042, 0.241	0.00587
LINC00668	TOPORS	-2.77	368	-0.14	-0.241, -0.042	0.00587
LINC00668	ZHX3	-2.77	368	-0.14	-0.241, -0.041	0.00591
LINC00668	CXorf36	-2.77	368	-0.14	-0.241, -0.041	0.00592
LINC00668	GALK2	2.77	368	0.14	0.041, 0.241	0.00594
LINC00668	DEPDC7	-2.77	368	-0.14	-0.241, -0.041	0.00596
LINC00668	RAD51AP1	2.77	368	0.14	0.041, 0.241	0.00598
LINC00668	XPO5	2.77	368	0.14	0.041, 0.241	0.00598
LINC00668	EIF5B	2.76	368	0.14	0.041, 0.241	0.00599
LINC00668	MGME1	2.76	368	0.14	0.041, 0.241	0.006
LINC00668	MFSD8	-2.76	368	-0.14	-0.241, -0.041	0.00601
LINC00668	FBXL5	-2.76	368	-0.14	-0.241, -0.041	0.00602
LINC00668	CLHC1	-2.76	368	-0.14	-0.241, -0.041	0.00606
LINC00668	RAB32	2.76	368	0.14	0.041, 0.241	0.00609
LINC00668	PPP2CA	2.76	368	0.14	0.041, 0.241	0.00611
LINC00668	TES	2.76	368	0.14	0.041, 0.241	0.00611
LINC00668	BORCS7	-2.76	368	-0.14	-0.241, -0.041	0.00612
LINC00668	ZSWIM8	-2.76	368	-0.14	-0.241, -0.041	0.00614
LINC00668	UCKL1	2.76	368	0.14	0.041, 0.241	0.00615
LINC00668	MAP3K15	2.76	368	0.14	0.041, 0.241	0.00616
LINC00668	SKIV2L2	2.76	368	0.14	0.041, 0.241	0.00616
LINC00668	COMMD8	2.76	368	0.14	0.041, 0.241	0.00616
LINC00668	TCEANC2	2.75	368	0.14	0.041, 0.241	0.00618
LINC00668	SHCBP1	2.75	368	0.14	0.041, 0.241	0.00619
LINC00668	OSBPL5	-2.75	368	-0.14	-0.24, -0.041	0.00626
LINC00668	GUCY1A2	-2.75	368	-0.14	-0.24, -0.04	0.00628
LINC00668	RNF170	-2.75	368	-0.14	-0.24, -0.04	0.00629
LINC00668	MRPL32	-2.75	368	-0.14	-0.24, -0.04	0.00629
LINC00668	JAM2	-2.75	368	-0.14	-0.24, -0.04	0.0063
LINC00668	HES5	-2.75	368	-0.14	-0.24, -0.04	0.0063
LINC00668	MED19	2.75	368	0.14	0.04, 0.24	0.00631
LINC00668	DHRS12	-2.75	368	-0.14	-0.24, -0.04	0.00632
LINC00668	MPRIP	-2.75	368	-0.14	-0.24, -0.04	0.00633
LINC00668	DCTPP1	2.75	368	0.14	0.04, 0.24	0.00634
LINC00668	SLC25A25	-2.74	368	-0.14	-0.24, -0.04	0.00635
LINC00668	ZNF490	-2.74	368	-0.14	-0.24, -0.04	0.00636
LINC00668	MRPS15	2.74	368	0.14	0.04, 0.24	0.00639
LINC00668	PATJ	2.74	368	0.14	0.04, 0.24	0.0064
LINC00668	MMP21	-2.74	368	-0.14	-0.24, -0.04	0.0064
LINC00668	CCDC88A	2.74	368	0.14	0.04, 0.24	0.0064
LINC00668	PA2G4	2.74	368	0.14	0.04, 0.24	0.00641
LINC00668	B4GALT2	2.74	368	0.14	0.04, 0.24	0.00645
LINC00668	KANK3	-2.74	368	-0.14	-0.24, -0.04	0.00646
LINC00668	SMARCC1	2.74	368	0.14	0.04, 0.24	0.00648
LINC00668	DPY30	2.74	368	0.14	0.04, 0.24	0.00649
LINC00668	PNPLA7	-2.74	368	-0.14	-0.24, -0.04	0.0065
LINC00668	TRPC6	-2.74	368	-0.14	-0.24, -0.04	0.00651
LINC00668	SLC24A4	-2.74	368	-0.14	-0.24, -0.04	0.00652
LINC00668	DVL1	2.74	368	0.14	0.04, 0.24	0.00654
LINC00668	DERL2	-2.73	368	-0.14	-0.24, -0.04	0.00656
LINC00668	KARS	2.73	368	0.14	0.04, 0.24	0.00659
LINC00668	COBLL1	-2.73	368	-0.14	-0.24, -0.04	0.0066
LINC00668	RNMT	2.73	368	0.14	0.04, 0.24	0.00661
LINC00668	MRPL37	2.73	368	0.14	0.04, 0.24	0.00662
LINC00668	EVI5L	-2.73	368	-0.14	-0.24, -0.04	0.00662
LINC00668	NECAB2	2.73	368	0.14	0.039, 0.239	0.00665
LINC00668	TTC1	2.73	368	0.14	0.039, 0.239	0.00665
LINC00668	RBMS3	-2.73	368	-0.14	-0.239, -0.039	0.00668
LINC00668	SPINK5	2.73	368	0.14	0.039, 0.239	0.0067
LINC00668	IL3RA	-2.73	368	-0.14	-0.239, -0.039	0.00672
LINC00668	BTF3L4	2.73	368	0.14	0.039, 0.239	0.00672
LINC00668	PMM1	2.72	368	0.14	0.039, 0.239	0.00674
LINC00668	TIPIN	2.73	368	0.14	0.039, 0.239	0.00674
LINC00668	PSMD10	2.72	368	0.14	0.039, 0.239	0.00676
LINC00668	EXD3	-2.72	368	-0.14	-0.239, -0.039	0.00677
LINC00668	ERI1	2.72	368	0.14	0.039, 0.239	0.00679
LINC00668	C9orf50	-2.72	368	-0.14	-0.239, -0.039	0.00683
LINC00668	GPS1	2.72	368	0.14	0.039, 0.239	0.00684
LINC00668	TMEM222	2.72	368	0.14	0.039, 0.239	0.00686
LINC00668	MAP2K4	-2.72	368	-0.14	-0.239, -0.039	0.00686
LINC00668	MED18	2.72	368	0.14	0.039, 0.239	0.00687
LINC00668	RCC2	2.72	368	0.14	0.039, 0.239	0.00691
LINC00668	XKR4	2.72	368	0.14	0.039, 0.239	0.00692
LINC00668	PIWIL2	2.72	368	0.14	0.039, 0.239	0.00692
LINC00668	PDE8B	-2.71	368	-0.14	-0.239, -0.039	0.00695
LINC00668	SP140L	2.71	368	0.14	0.039, 0.239	0.00695
LINC00668	PRSS46	2.71	368	0.14	0.039, 0.239	0.00698
LINC00668	DDX41	2.71	368	0.14	0.039, 0.239	0.00698
LINC00668	MTA2	2.71	368	0.14	0.039, 0.239	0.00699
LINC00668	PSMD3	2.71	368	0.14	0.039, 0.239	0.007
LINC00668	ZNF845	2.71	368	0.14	0.039, 0.239	0.007
LINC00668	FAM98B	2.71	368	0.14	0.039, 0.239	0.007
LINC00668	SLC31A1	-2.71	368	-0.14	-0.239, -0.039	0.00701
LINC00668	TAF4B	2.71	368	0.14	0.039, 0.238	0.00703
LINC00668	IQCD	2.71	368	0.14	0.038, 0.238	0.00704
LINC00668	CTSO	-2.71	368	-0.14	-0.238, -0.038	0.00706
LINC00668	CEP131	2.71	368	0.14	0.038, 0.238	0.00707
LINC00668	PDCD2L	2.71	368	0.14	0.038, 0.238	0.0071
LINC00668	FBXW4	-2.71	368	-0.14	-0.238, -0.038	0.00712
LINC00668	PTP4A2	2.71	368	0.14	0.038, 0.238	0.00712
LINC00668	N4BP2L1	-2.71	368	-0.14	-0.238, -0.038	0.00713
LINC00668	FAM50A	2.71	368	0.14	0.038, 0.238	0.00713
LINC00668	SPATA6L	-2.71	368	-0.14	-0.238, -0.038	0.00714
LINC00668	ZNF729	2.7	368	0.14	0.038, 0.238	0.00715
LINC00668	DHODH	-2.7	368	-0.14	-0.238, -0.038	0.00715
LINC00668	RNASEH1	2.7	368	0.14	0.038, 0.238	0.00717
LINC00668	ZCWPW2	-2.7	368	-0.14	-0.238, -0.038	0.00718
LINC00668	CCDC3	-2.7	368	-0.14	-0.238, -0.038	0.00718
LINC00668	YEATS2	2.7	368	0.14	0.038, 0.238	0.00719
LINC00668	DHX58	-2.7	368	-0.14	-0.238, -0.038	0.0072
LINC00668	RGCC	-2.7	368	-0.14	-0.238, -0.038	0.00723
LINC00668	ERLIN1	-2.7	368	-0.14	-0.238, -0.038	0.00724
LINC00668	GINS4	2.7	368	0.14	0.038, 0.238	0.00724
LINC00668	USP28	2.7	368	0.14	0.038, 0.238	0.00724
LINC00668	AARS	2.7	368	0.14	0.038, 0.238	0.00724
LINC00668	MED6	2.7	368	0.14	0.038, 0.238	0.00725
LINC00668	ALG2	-2.7	368	-0.14	-0.238, -0.038	0.00727
LINC00668	CXorf56	2.7	368	0.14	0.038, 0.238	0.00728
LINC00668	APCS	-2.7	368	-0.14	-0.238, -0.038	0.00729
LINC00668	UBL7	2.7	368	0.14	0.038, 0.238	0.00731
LINC00668	RAP1A	2.7	368	0.14	0.038, 0.238	0.00732
LINC00668	MYO6	2.7	368	0.14	0.038, 0.238	0.00735
LINC00668	LINC00998	2.69	368	0.14	0.038, 0.238	0.00736
LINC00668	RPL3L	2.69	368	0.14	0.038, 0.238	0.00739
LINC00668	CRIP2	-2.69	368	-0.14	-0.238, -0.038	0.00741
LINC00668	CDCA3	2.69	368	0.14	0.038, 0.238	0.00741
LINC00668	SMAD7	-2.69	368	-0.14	-0.238, -0.038	0.00742
LINC00668	ZNF121	-2.69	368	-0.14	-0.238, -0.038	0.00742
LINC00668	HDAC2	2.69	368	0.14	0.038, 0.238	0.00743
LINC00668	MAPRE2	2.69	368	0.14	0.038, 0.238	0.00744
LINC00668	BAIAP2	-2.69	368	-0.14	-0.238, -0.037	0.00745
LINC00668	NOL11	2.69	368	0.14	0.037, 0.237	0.00748
LINC00668	LDLRAD2	-2.69	368	-0.14	-0.237, -0.037	0.00749
LINC00668	OR56A3	2.69	368	0.14	0.037, 0.237	0.0075
LINC00668	SLC39A4	2.69	368	0.14	0.037, 0.237	0.0075
LINC00668	TRIM13	-2.69	368	-0.14	-0.237, -0.037	0.00752
LINC00668	DBF4	2.69	368	0.14	0.037, 0.237	0.00753
LINC00668	CLEC1A	-2.69	368	-0.14	-0.237, -0.037	0.00754
LINC00668	PRSS45	2.69	368	0.14	0.037, 0.237	0.00756
LINC00668	ZC3H13	-2.69	368	-0.14	-0.237, -0.037	0.00756
LINC00668	SLC6A19	2.69	368	0.14	0.037, 0.237	0.00756
LINC00668	SAP30	2.69	368	0.14	0.037, 0.237	0.00757
LINC00668	CCDC58	2.69	368	0.14	0.037, 0.237	0.00757
LINC00668	EGFL8	-2.69	368	-0.14	-0.237, -0.037	0.00758
LINC00668	TLE1	-2.68	368	-0.14	-0.237, -0.037	0.00759
LINC00668	TRIM16L	2.68	368	0.14	0.037, 0.237	0.0076
LINC00668	MRRF	-2.68	368	-0.14	-0.237, -0.037	0.00762
LINC00668	CALML4	2.68	368	0.14	0.037, 0.237	0.00763
LINC00668	PSMC4	2.68	368	0.14	0.037, 0.237	0.00763
LINC00668	GIMAP8	-2.68	368	-0.14	-0.237, -0.037	0.00766
LINC00668	PABPC3	2.68	368	0.14	0.037, 0.237	0.00767
LINC00668	PIR	2.68	368	0.14	0.037, 0.237	0.00767
LINC00668	ERVV-2	2.68	368	0.14	0.037, 0.237	0.00769
LINC00668	LRPPRC	2.68	368	0.14	0.037, 0.237	0.00769
LINC00668	LAMTOR5	2.68	368	0.14	0.037, 0.237	0.00771
LINC00668	TOGARAM1	-2.68	368	-0.14	-0.237, -0.037	0.00772
LINC00668	DAAM1	-2.68	368	-0.14	-0.237, -0.037	0.00772
LINC00668	PRKCD	2.68	368	0.14	0.037, 0.237	0.00774
LINC00668	RHOB	-2.68	368	-0.14	-0.237, -0.037	0.00775
LINC00668	TESMIN	2.68	368	0.14	0.037, 0.237	0.00777
LINC00668	GRASP	-2.68	368	-0.14	-0.237, -0.037	0.00778
LINC00668	ERC2	2.68	368	0.14	0.037, 0.237	0.00779
LINC00668	NKIRAS2	2.68	368	0.14	0.037, 0.237	0.0078
LINC00668	PIWIL3	2.68	368	0.14	0.037, 0.237	0.0078
LINC00668	SLC9B2	-2.67	368	-0.14	-0.237, -0.037	0.00781
LINC00668	MYO3B	2.67	368	0.14	0.037, 0.237	0.00782
LINC00668	CFL1	2.67	368	0.14	0.037, 0.237	0.00784
LINC00668	NHP2	2.67	368	0.14	0.037, 0.237	0.00784
LINC00668	NME6	2.67	368	0.14	0.037, 0.237	0.00785
LINC00668	NCAPG2	2.67	368	0.14	0.037, 0.237	0.00786
LINC00668	TCF21	-2.67	368	-0.14	-0.237, -0.037	0.00786
LINC00668	TMEM129	-2.67	368	-0.14	-0.237, -0.037	0.00787
LINC00668	HNRNPU	2.67	368	0.14	0.037, 0.237	0.00788
LINC00668	MCM4	2.67	368	0.14	0.036, 0.237	0.0079
LINC00668	TTLL2	2.67	368	0.14	0.036, 0.236	0.00792
LINC00668	KIAA1429	2.67	368	0.14	0.036, 0.236	0.00792
LINC00668	KHDC1	2.67	368	0.14	0.036, 0.236	0.00792
LINC00668	BLOC1S2	-2.67	368	-0.14	-0.236, -0.036	0.00794
LINC00668	CENPC	-2.67	368	-0.14	-0.236, -0.036	0.00796
LINC00668	NAA20	2.67	368	0.14	0.036, 0.236	0.00801
LINC00668	TMEM243	2.67	368	0.14	0.036, 0.236	0.00801
LINC00668	WDR87	2.67	368	0.14	0.036, 0.236	0.00802
LINC00668	ARMC8	2.67	368	0.14	0.036, 0.236	0.00803
LINC00668	R3HCC1L	-2.66	368	-0.14	-0.236, -0.036	0.00804
LINC00668	DDX55	2.66	368	0.14	0.036, 0.236	0.00807
LINC00668	FOXO1	-2.66	368	-0.14	-0.236, -0.036	0.00807
LINC00668	C17orf80	2.66	368	0.14	0.036, 0.236	0.00807
LINC00668	TEX11	2.66	368	0.14	0.036, 0.236	0.00807
LINC00668	CHAF1B	2.66	368	0.14	0.036, 0.236	0.00807
LINC00668	HPS3	2.66	368	0.14	0.036, 0.236	0.00808
LINC00668	VPS72	2.66	368	0.14	0.036, 0.236	0.00808
LINC00668	CIB2	2.66	368	0.14	0.036, 0.236	0.00808
LINC00668	RNGTT	2.66	368	0.14	0.036, 0.236	0.00809
LINC00668	TIMM23B	-2.66	368	-0.14	-0.236, -0.036	0.00812
LINC00668	F7	-2.66	368	-0.14	-0.236, -0.036	0.00812
LINC00668	ZSWIM7	-2.66	368	-0.14	-0.236, -0.036	0.00813
LINC00668	IRAK2	2.66	368	0.14	0.036, 0.236	0.00813
LINC00668	POLE2	2.66	368	0.14	0.036, 0.236	0.00813
LINC00668	FOXH1	2.66	368	0.14	0.036, 0.236	0.00814
LINC00668	NAALADL2	-2.66	368	-0.14	-0.236, -0.036	0.00816
LINC00668	ZW10	2.66	368	0.14	0.036, 0.236	0.00818
LINC00668	KRT27	-2.66	368	-0.14	-0.236, -0.036	0.00822
LINC00668	PPA2	-2.66	368	-0.14	-0.236, -0.036	0.00823
LINC00668	FAM213B	2.65	368	0.14	0.036, 0.236	0.00832
LINC00668	TEK	-2.65	368	-0.14	-0.236, -0.036	0.00833
LINC00668	NEMP1	2.65	368	0.14	0.035, 0.236	0.00834
LINC00668	TDRKH	2.65	368	0.14	0.035, 0.236	0.00838
LINC00668	AOC3	-2.65	368	-0.14	-0.235, -0.035	0.00842
LINC00668	XPO6	2.65	368	0.14	0.035, 0.235	0.00844
LINC00668	KIF14	2.65	368	0.14	0.035, 0.235	0.00845
LINC00668	SART1	2.65	368	0.14	0.035, 0.235	0.00845
LINC00668	METRN	-2.65	368	-0.14	-0.235, -0.035	0.00846
LINC00668	ANKEF1	2.65	368	0.14	0.035, 0.235	0.00846
LINC00668	UBE2D2	2.65	368	0.14	0.035, 0.235	0.00847
LINC00668	THBD	-2.65	368	-0.14	-0.235, -0.035	0.00849
LINC00668	CPNE6	2.65	368	0.14	0.035, 0.235	0.00849
LINC00668	ZNF10	-2.65	368	-0.14	-0.235, -0.035	0.00849
LINC00668	MT-ATP8	-2.65	368	-0.14	-0.235, -0.035	0.0085
LINC00668	NAA50	2.64	368	0.14	0.035, 0.235	0.00853
LINC00668	SUPV3L1	-2.64	368	-0.14	-0.235, -0.035	0.00853
LINC00668	LRRC4B	-2.64	368	-0.14	-0.235, -0.035	0.00854
LINC00668	LTC4S	-2.64	368	-0.14	-0.235, -0.035	0.00855
LINC00668	UGDH	2.64	368	0.14	0.035, 0.235	0.00857
LINC00668	CA5A	-2.64	368	-0.14	-0.235, -0.035	0.00857
LINC00668	LYAR	2.64	368	0.14	0.035, 0.235	0.00858
LINC00668	HOGA1	-2.64	368	-0.14	-0.235, -0.035	0.00858
LINC00668	CRH	2.64	368	0.14	0.035, 0.235	0.00864
LINC00668	RLF	2.64	368	0.14	0.035, 0.235	0.00864
LINC00668	VHL	2.64	368	0.14	0.035, 0.235	0.00865
LINC00668	ARHGAP11B	2.64	368	0.14	0.035, 0.235	0.00867
LINC00668	SAV1	-2.64	368	-0.14	-0.235, -0.035	0.00869
LINC00668	CCT3	2.64	368	0.14	0.035, 0.235	0.0087
LINC00668	PDZD4	-2.64	368	-0.14	-0.235, -0.035	0.0087
LINC00668	TPM3	2.64	368	0.14	0.035, 0.235	0.00871
LINC00668	ZC3H6	-2.64	368	-0.14	-0.235, -0.035	0.00871
LINC00668	TSPY10	2.64	368	0.14	0.035, 0.235	0.00872
LINC00668	FCHSD1	2.64	368	0.14	0.035, 0.235	0.00874
LINC00668	PUF60	2.64	368	0.14	0.035, 0.235	0.00876
LINC00668	TSPAN18	-2.63	368	-0.14	-0.235, -0.035	0.00877
LINC00668	KPNA6	2.63	368	0.14	0.035, 0.235	0.00879
LINC00668	UROS	-2.63	368	-0.14	-0.235, -0.035	0.00881
LINC00668	HERC4	-2.63	368	-0.14	-0.235, -0.034	0.00884
LINC00668	ZNF253	2.63	368	0.14	0.034, 0.235	0.00888
LINC00668	JDP2	-2.63	368	-0.14	-0.235, -0.034	0.0089
LINC00668	NOL10	2.63	368	0.14	0.034, 0.235	0.0089
LINC00668	SUSD6	-2.63	368	-0.14	-0.234, -0.034	0.00892
LINC00668	CYP11A1	-2.63	368	-0.14	-0.234, -0.034	0.00895
LINC00668	ZCRB1	2.63	368	0.14	0.034, 0.234	0.00899
LINC00668	CXCL2	-2.63	368	-0.14	-0.234, -0.034	0.00899
LINC00668	IMMT	2.63	368	0.14	0.034, 0.234	0.00899
LINC00668	NUDT13	-2.63	368	-0.14	-0.234, -0.034	0.009
LINC00668	RNF19B	2.63	368	0.14	0.034, 0.234	0.00902
LINC00668	CBFA2T3	-2.62	368	-0.14	-0.234, -0.034	0.00904
LINC00668	SH2D6	2.62	368	0.14	0.034, 0.234	0.00904
LINC00668	MAP4K2	2.62	368	0.14	0.034, 0.234	0.00907
LINC00668	TINAG	2.62	368	0.14	0.034, 0.234	0.00907
LINC00668	CBR4	-2.62	368	-0.14	-0.234, -0.034	0.00909
LINC00668	ZNF423	-2.62	368	-0.14	-0.234, -0.034	0.00909
LINC00668	EDNRB	-2.62	368	-0.14	-0.234, -0.034	0.00913
LINC00668	SLCO2A1	-2.62	368	-0.14	-0.234, -0.034	0.00913
LINC00668	GAS2L3	2.62	368	0.14	0.034, 0.234	0.00913
LINC00668	TFDP2	2.62	368	0.14	0.034, 0.234	0.00916
LINC00668	TMEM241	2.62	368	0.14	0.034, 0.234	0.00916
LINC00668	SRI	2.62	368	0.14	0.034, 0.234	0.0092
LINC00668	XRCC5	2.62	368	0.14	0.034, 0.234	0.00923
LINC00668	ABHD13	-2.62	368	-0.14	-0.234, -0.034	0.00923
LINC00668	R3HDM2	-2.62	368	-0.14	-0.234, -0.034	0.00924
LINC00668	LSM3	2.62	368	0.14	0.034, 0.234	0.00924
LINC00668	REC114	2.62	368	0.14	0.034, 0.234	0.00925
LINC00668	SNRPB2	2.62	368	0.14	0.034, 0.234	0.00926
LINC00668	CRY2	-2.62	368	-0.14	-0.234, -0.034	0.00927
LINC00668	ZNF839	-2.62	368	-0.14	-0.234, -0.034	0.00927
LINC00668	ECSCR	-2.61	368	-0.14	-0.234, -0.034	0.0093
LINC00668	VCX2	2.61	368	0.13	0.033, 0.234	0.00934
LINC00668	PDK3	2.61	368	0.13	0.033, 0.234	0.00935
LINC00668	SCN4A	-2.61	368	-0.13	-0.234, -0.033	0.00937
LINC00668	CU639417.2	-2.61	368	-0.13	-0.234, -0.033	0.00939
LINC00668	IPP	2.61	368	0.13	0.033, 0.234	0.00939
LINC00668	BTBD19	-2.61	368	-0.13	-0.234, -0.033	0.00942
LINC00668	CCDC13	2.61	368	0.13	0.033, 0.234	0.00944
LINC00668	C3orf38	2.61	368	0.13	0.033, 0.234	0.00945
LINC00668	SCN4B	-2.61	368	-0.13	-0.233, -0.033	0.00946
LINC00668	NELFE	2.61	368	0.13	0.033, 0.234	0.00946
LINC00668	TOX2	2.61	368	0.13	0.033, 0.233	0.0095
LINC00668	TMEM132E	-2.61	368	-0.13	-0.233, -0.033	0.00954
LINC00668	SEC16B	-2.61	368	-0.13	-0.233, -0.033	0.00954
LINC00668	BCL2	-2.61	368	-0.13	-0.233, -0.033	0.00954
LINC00668	USP7	2.61	368	0.13	0.033, 0.233	0.00955
LINC00668	ZNF207	2.6	368	0.13	0.033, 0.233	0.00957
LINC00668	PIK3R1	-2.6	368	-0.13	-0.233, -0.033	0.00958
LINC00668	DKC1	2.6	368	0.13	0.033, 0.233	0.0096
LINC00668	APOLD1	-2.6	368	-0.13	-0.233, -0.033	0.0096
LINC00668	IDUA	-2.6	368	-0.13	-0.233, -0.033	0.00961
LINC00668	MUL1	2.6	368	0.13	0.033, 0.233	0.00966
LINC00668	BTBD18	-2.6	368	-0.13	-0.233, -0.033	0.00967
LINC00668	CHIC2	-2.6	368	-0.13	-0.233, -0.033	0.00969
LINC00668	RPN2	2.6	368	0.13	0.033, 0.233	0.0097
LINC00668	SMS	2.6	368	0.13	0.033, 0.233	0.00972
LINC00668	RGS3	-2.6	368	-0.13	-0.233, -0.033	0.00973
LINC00668	ACRV1	2.6	368	0.13	0.033, 0.233	0.00975
LINC00668	KLF2	-2.6	368	-0.13	-0.233, -0.033	0.00976
LINC00668	GPIHBP1	-2.6	368	-0.13	-0.233, -0.033	0.00978
LINC00668	GTF2H1	2.6	368	0.13	0.033, 0.233	0.0098
LINC00668	DCLRE1B	2.6	368	0.13	0.033, 0.233	0.0098
LINC00668	KIAA1107	2.6	368	0.13	0.033, 0.233	0.00981
LINC00668	AC010547.5	-2.6	368	-0.13	-0.233, -0.033	0.00984
LINC00668	CAMK1D	-2.59	368	-0.13	-0.233, -0.033	0.00984
LINC00668	QDPR	-2.59	368	-0.13	-0.233, -0.033	0.00986
LINC00668	CDC42EP5	-2.59	368	-0.13	-0.233, -0.032	0.00987
LINC00668	B4GALT1	-2.59	368	-0.13	-0.233, -0.032	0.0099
LINC00668	TUBG1	2.59	368	0.13	0.032, 0.233	0.00994
LINC00668	GP6	-2.59	368	-0.13	-0.233, -0.032	0.00995
LINC00668	SF3A1	2.59	368	0.13	0.032, 0.233	0.00999
LINC00668	HMBS	2.59	368	0.13	0.032, 0.233	0.00999
LINC00668	USP16	2.59	368	0.13	0.032, 0.233	0.00999
LINC00668	GCLM	2.59	368	0.13	0.032, 0.233	0.01
LINC00668	HPDL	2.59	368	0.13	0.032, 0.233	0.01
LINC00668	ADAMTS8	-2.59	368	-0.13	-0.232, -0.032	0.01
LINC00668	ZBTB4	-2.59	368	-0.13	-0.232, -0.032	0.01
LINC00668	AKNAD1	2.59	368	0.13	0.032, 0.233	0.01
LINC00668	RAB40B	2.59	368	0.13	0.032, 0.233	0.01
LINC00668	PRPS1L1	2.59	368	0.13	0.032, 0.232	0.0101
LINC00668	RER1	2.59	368	0.13	0.032, 0.232	0.0101
LINC00668	DNAJB14	-2.59	368	-0.13	-0.232, -0.032	0.0101
LINC00668	ZFAND5	-2.59	368	-0.13	-0.232, -0.032	0.0101
LINC00668	GUF1	-2.58	368	-0.13	-0.232, -0.032	0.0102
LINC00668	SF3B4	2.58	368	0.13	0.032, 0.232	0.0102
LINC00668	SUCLG2	-2.58	368	-0.13	-0.232, -0.032	0.0102
LINC00668	ST6GALNAC5	2.58	368	0.13	0.032, 0.232	0.0102
LINC00668	SLF2	-2.58	368	-0.13	-0.232, -0.032	0.0102
LINC00668	DMAP1	2.58	368	0.13	0.032, 0.232	0.0102
LINC00668	ZNF25	-2.58	368	-0.13	-0.232, -0.032	0.0102
LINC00668	DLC1	-2.58	368	-0.13	-0.232, -0.032	0.0103
LINC00668	ERN1	-2.58	368	-0.13	-0.232, -0.032	0.0103
LINC00668	TAGLN	-2.58	368	-0.13	-0.232, -0.032	0.0103
LINC00668	WFDC1	-2.58	368	-0.13	-0.232, -0.032	0.0103
LINC00668	VPS53	-2.58	368	-0.13	-0.232, -0.032	0.0103
LINC00668	RAB11B	-2.58	368	-0.13	-0.232, -0.032	0.0103
LINC00668	TMEM150B	2.58	368	0.13	0.032, 0.232	0.0104
LINC00668	KPTN	2.58	368	0.13	0.032, 0.232	0.0104
LINC00668	SOX18	-2.57	368	-0.13	-0.232, -0.031	0.0104
LINC00668	CCDC134	2.58	368	0.13	0.032, 0.232	0.0104
LINC00668	ZNF846	-2.57	368	-0.13	-0.232, -0.031	0.0104
LINC00668	RANBP3	-2.57	368	-0.13	-0.232, -0.032	0.0104
LINC00668	ECSIT	-2.57	368	-0.13	-0.232, -0.031	0.0104
LINC00668	MTIF3	-2.57	368	-0.13	-0.232, -0.031	0.0104
LINC00668	SLC30A8	2.57	368	0.13	0.031, 0.232	0.0104
LINC00668	AKIRIN1	2.57	368	0.13	0.031, 0.232	0.0105
LINC00668	GSN	-2.57	368	-0.13	-0.232, -0.031	0.0105
LINC00668	C1orf27	-2.57	368	-0.13	-0.232, -0.031	0.0105
LINC00668	ZNF813	2.57	368	0.13	0.031, 0.232	0.0105
LINC00668	DDX4	2.57	368	0.13	0.031, 0.232	0.0105
LINC00668	SLC2A10	-2.57	368	-0.13	-0.232, -0.031	0.0105
LINC00668	IGSF3	2.57	368	0.13	0.031, 0.232	0.0105
LINC00668	RMDN2	-2.57	368	-0.13	-0.232, -0.031	0.0105
LINC00668	NCAPH2	2.57	368	0.13	0.031, 0.232	0.0105
LINC00668	WHAMM	-2.57	368	-0.13	-0.232, -0.031	0.0106
LINC00668	RIMS2	2.57	368	0.13	0.031, 0.232	0.0106
LINC00668	CASP8	2.57	368	0.13	0.031, 0.232	0.0106
LINC00668	EEF1A1	2.57	368	0.13	0.031, 0.232	0.0106
LINC00668	LIG4	-2.57	368	-0.13	-0.232, -0.031	0.0106
LINC00668	NCMAP	2.57	368	0.13	0.031, 0.232	0.0106
LINC00668	GCN1	2.57	368	0.13	0.031, 0.231	0.0106
LINC00668	IFNAR2	2.57	368	0.13	0.031, 0.232	0.0106
LINC00668	VAMP4	-2.57	368	-0.13	-0.232, -0.031	0.0106
LINC00668	SLC17A2	-2.57	368	-0.13	-0.232, -0.031	0.0106
LINC00668	BCL2L2	-2.57	368	-0.13	-0.232, -0.031	0.0106
LINC00668	REM1	-2.57	368	-0.13	-0.232, -0.031	0.0106
LINC00668	SLC37A4	-2.57	368	-0.13	-0.232, -0.031	0.0106
LINC00668	SRRM4	2.57	368	0.13	0.031, 0.231	0.0107
LINC00668	UQCRHL	2.56	368	0.13	0.031, 0.231	0.0107
LINC00668	HOXB7	2.57	368	0.13	0.031, 0.231	0.0107
LINC00668	PCMT1	2.56	368	0.13	0.031, 0.231	0.0108
LINC00668	SUV39H1	2.56	368	0.13	0.031, 0.231	0.0108
LINC00668	NRSN2	2.56	368	0.13	0.031, 0.231	0.0108
LINC00668	PPP1CA	2.56	368	0.13	0.031, 0.231	0.0108
LINC00668	AR	-2.56	368	-0.13	-0.231, -0.031	0.0108
LINC00668	TNFSF10	2.56	368	0.13	0.031, 0.231	0.0108
LINC00668	PTPA	-2.56	368	-0.13	-0.231, -0.031	0.0108
LINC00668	EPS15	2.56	368	0.13	0.031, 0.231	0.0108
LINC00668	MYL5	-2.56	368	-0.13	-0.231, -0.031	0.0108
LINC00668	CEP162	2.56	368	0.13	0.031, 0.231	0.0109
LINC00668	DLAT	2.55	368	0.13	0.03, 0.23	0.011
LINC00668	PTPN23	2.55	368	0.13	0.03, 0.23	0.011
LINC00668	TCTN3	-2.55	368	-0.13	-0.23, -0.03	0.011
LINC00668	LY6K	2.55	368	0.13	0.03, 0.23	0.011
LINC00668	SPON2	2.56	368	0.13	0.031, 0.231	0.011
LINC00668	ZNF442	-2.56	368	-0.13	-0.231, -0.031	0.011
LINC00668	PACRG	-2.55	368	-0.13	-0.23, -0.03	0.0111
LINC00668	MSH4	2.55	368	0.13	0.03, 0.23	0.0111
LINC00668	PES1	2.55	368	0.13	0.03, 0.23	0.0111
LINC00668	PPIF	-2.55	368	-0.13	-0.23, -0.03	0.0111
LINC00668	ANXA2	2.55	368	0.13	0.03, 0.23	0.0111
LINC00668	KLRF1	-2.55	368	-0.13	-0.23, -0.03	0.0111
LINC00668	P2RY6	2.55	368	0.13	0.03, 0.23	0.0111
LINC00668	GUCA1B	-2.55	368	-0.13	-0.23, -0.03	0.0111
LINC00668	C15orf38-AP3S2	-2.55	368	-0.13	-0.23, -0.03	0.0112
LINC00668	FAM193B	-2.55	368	-0.13	-0.23, -0.03	0.0112
LINC00668	LCAT	-2.55	368	-0.13	-0.23, -0.03	0.0112
LINC00668	DENND2A	-2.55	368	-0.13	-0.23, -0.03	0.0112
LINC00668	43161	-2.55	368	-0.13	-0.23, -0.03	0.0112
LINC00668	IMMP2L	-2.55	368	-0.13	-0.23, -0.03	0.0112
LINC00668	SLC18B1	2.55	368	0.13	0.03, 0.23	0.0112
LINC00668	ERVV-1	2.55	368	0.13	0.03, 0.23	0.0112
LINC00668	BBOF1	2.55	368	0.13	0.03, 0.23	0.0112
LINC00668	FAM120C	-2.55	368	-0.13	-0.23, -0.03	0.0113
LINC00668	AVPR2	-2.54	368	-0.13	-0.23, -0.03	0.0114
LINC00668	CYP46A1	-2.54	368	-0.13	-0.23, -0.03	0.0114
LINC00668	CSRNP1	-2.54	368	-0.13	-0.23, -0.03	0.0114
LINC00668	CYP2E1	-2.54	368	-0.13	-0.23, -0.03	0.0114
LINC00668	MFAP1	2.54	368	0.13	0.03, 0.23	0.0114
LINC00668	MAFG	2.54	368	0.13	0.03, 0.23	0.0114
LINC00668	C10orf105	-2.54	368	-0.13	-0.23, -0.03	0.0114
LINC00668	NYNRIN	2.54	368	0.13	0.03, 0.23	0.0115
LINC00668	MT-ATP6	-2.54	368	-0.13	-0.23, -0.03	0.0115
LINC00668	GPR156	2.54	368	0.13	0.03, 0.23	0.0115
LINC00668	ZNF835	2.54	368	0.13	0.03, 0.23	0.0115
LINC00668	SLC23A2	-2.54	368	-0.13	-0.23, -0.03	0.0115
LINC00668	CCT6B	-2.54	368	-0.13	-0.23, -0.03	0.0115
LINC00668	HOXD13	2.54	368	0.13	0.03, 0.23	0.0116
LINC00668	COA4	2.54	368	0.13	0.03, 0.23	0.0116
LINC00668	ARL8A	-2.54	368	-0.13	-0.23, -0.03	0.0116
LINC00668	SLC25A30	-2.54	368	-0.13	-0.23, -0.03	0.0116
LINC00668	IVD	-2.54	368	-0.13	-0.23, -0.029	0.0116
LINC00668	RIOK3	2.53	368	0.13	0.029, 0.23	0.0117
LINC00668	ASNS	2.53	368	0.13	0.029, 0.23	0.0117
LINC00668	ECM2	-2.53	368	-0.13	-0.23, -0.029	0.0117
LINC00668	FABP6	2.53	368	0.13	0.029, 0.23	0.0118
LINC00668	ZNF93	2.53	368	0.13	0.029, 0.23	0.0118
LINC00668	C14orf28	-2.53	368	-0.13	-0.23, -0.029	0.0118
LINC00668	IL1RL2	2.53	368	0.13	0.029, 0.23	0.0118
LINC00668	FNDC3A	-2.53	368	-0.13	-0.23, -0.029	0.0118
LINC00668	CFLAR	-2.53	368	-0.13	-0.23, -0.029	0.0118
LINC00668	SPRY1	-2.53	368	-0.13	-0.23, -0.029	0.0118
LINC00668	ANO7	2.53	368	0.13	0.029, 0.23	0.0118
LINC00668	IFIT5	-2.53	368	-0.13	-0.23, -0.029	0.0118
LINC00668	VPS16	2.53	368	0.13	0.029, 0.23	0.0118
LINC00668	ZNF280A	2.53	368	0.13	0.029, 0.23	0.0118
LINC00668	MEF2C	-2.53	368	-0.13	-0.23, -0.029	0.0119
LINC00668	ID2	-2.53	368	-0.13	-0.23, -0.029	0.0119
LINC00668	DPH5	2.53	368	0.13	0.029, 0.23	0.0119
LINC00668	BUD23	2.53	368	0.13	0.029, 0.23	0.0119
LINC00668	NFIC	-2.53	368	-0.13	-0.23, -0.029	0.0119
LINC00668	PLBD1	2.53	368	0.13	0.029, 0.229	0.0119
LINC00668	TTC28	-2.52	368	-0.13	-0.229, -0.029	0.012
LINC00668	ARHGEF10	-2.52	368	-0.13	-0.229, -0.029	0.012
LINC00668	MRPL47	2.53	368	0.13	0.029, 0.229	0.012
LINC00668	URGCP-MRPS24	-2.52	368	-0.13	-0.229, -0.029	0.012
LINC00668	FAM214A	-2.53	368	-0.13	-0.229, -0.029	0.012
LINC00668	CLEC3B	-2.52	368	-0.13	-0.229, -0.029	0.012
LINC00668	KNOP1	2.52	368	0.13	0.029, 0.229	0.012
LINC00668	ALAD	-2.52	368	-0.13	-0.229, -0.029	0.012
LINC00668	MIB2	2.53	368	0.13	0.029, 0.229	0.012
LINC00668	AK2	2.52	368	0.13	0.029, 0.229	0.0121
LINC00668	PTGIR	-2.52	368	-0.13	-0.229, -0.029	0.0121
LINC00668	GPRIN1	2.52	368	0.13	0.029, 0.229	0.0121
LINC00668	AGFG1	2.52	368	0.13	0.029, 0.229	0.0121
LINC00668	POLR3E	2.52	368	0.13	0.029, 0.229	0.0121
LINC00668	SCN9A	2.52	368	0.13	0.029, 0.229	0.0122
LINC00668	ADPRHL1	2.52	368	0.13	0.029, 0.229	0.0122
LINC00668	KDR	-2.52	368	-0.13	-0.229, -0.029	0.0122
LINC00668	RILPL1	-2.52	368	-0.13	-0.229, -0.029	0.0122
LINC00668	MAF	-2.52	368	-0.13	-0.229, -0.028	0.0123
LINC00668	NOXA1	-2.52	368	-0.13	-0.229, -0.029	0.0123
LINC00668	PCDHB3	2.51	368	0.13	0.028, 0.229	0.0123
LINC00668	IRGM	2.51	368	0.13	0.028, 0.229	0.0124
LINC00668	TRA2B	2.51	368	0.13	0.028, 0.229	0.0124
LINC00668	DPP3	2.51	368	0.13	0.028, 0.229	0.0124
LINC00668	JSRP1	2.51	368	0.13	0.028, 0.229	0.0124
LINC00668	TIMM29	-2.51	368	-0.13	-0.229, -0.028	0.0124
LINC00668	FAXDC2	-2.51	368	-0.13	-0.229, -0.028	0.0124
LINC00668	PPM1M	2.51	368	0.13	0.028, 0.229	0.0124
LINC00668	LRRC40	2.51	368	0.13	0.028, 0.229	0.0124
LINC00668	DCAF13	2.51	368	0.13	0.028, 0.229	0.0125
LINC00668	AGMAT	2.51	368	0.13	0.028, 0.229	0.0125
LINC00668	CBX1	2.51	368	0.13	0.028, 0.229	0.0125
LINC00668	INCA1	-2.51	368	-0.13	-0.229, -0.028	0.0125
LINC00668	CCZ1B	2.51	368	0.13	0.028, 0.229	0.0125
LINC00668	GPT2	-2.51	368	-0.13	-0.229, -0.028	0.0125
LINC00668	FUNDC2	2.51	368	0.13	0.028, 0.229	0.0126
LINC00668	PTEN	-2.51	368	-0.13	-0.228, -0.028	0.0126
LINC00668	OGG1	2.51	368	0.13	0.028, 0.229	0.0126
LINC00668	ZRANB1	-2.51	368	-0.13	-0.229, -0.028	0.0126
LINC00668	C1GALT1C1L	2.51	368	0.13	0.028, 0.228	0.0126
LINC00668	ZNF676	2.51	368	0.13	0.028, 0.229	0.0126
LINC00668	ZNF726	2.5	368	0.13	0.028, 0.228	0.0127
LINC00668	PDZD11	2.51	368	0.13	0.028, 0.228	0.0127
LINC00668	MAST4	-2.5	368	-0.13	-0.228, -0.028	0.0127
LINC00668	FOXI2	-2.5	368	-0.13	-0.228, -0.028	0.0127
LINC00668	PAQR6	-2.5	368	-0.13	-0.228, -0.028	0.0127
LINC00668	PEX11G	-2.5	368	-0.13	-0.228, -0.028	0.0127
LINC00668	PPP1R13B	-2.5	368	-0.13	-0.228, -0.028	0.0127
LINC00668	ALB	-2.5	368	-0.13	-0.228, -0.028	0.0127
LINC00668	ZNF765	2.5	368	0.13	0.028, 0.228	0.0128
LINC00668	CCDC186	-2.5	368	-0.13	-0.228, -0.028	0.0128
LINC00668	RIMS3	2.5	368	0.13	0.028, 0.228	0.0128
LINC00668	BRSK1	2.5	368	0.13	0.028, 0.228	0.0128
LINC00668	TMEM88B	2.5	368	0.13	0.028, 0.228	0.0129
LINC00668	SVIL	-2.5	368	-0.13	-0.228, -0.028	0.0129
LINC00668	OTOGL	2.5	368	0.13	0.028, 0.228	0.0129
LINC00668	SPINK2	2.5	368	0.13	0.028, 0.228	0.0129
LINC00668	AUP1	2.5	368	0.13	0.028, 0.228	0.0129
LINC00668	ANKRD27	2.5	368	0.13	0.028, 0.228	0.0129
LINC00668	RAET1E	2.5	368	0.13	0.028, 0.228	0.0129
LINC00668	SMYD4	-2.5	368	-0.13	-0.228, -0.028	0.0129
LINC00668	TRAPPC6B	-2.5	368	-0.13	-0.228, -0.028	0.0129
LINC00668	TTLL9	2.5	368	0.13	0.028, 0.228	0.0129
LINC00668	ZNF792	2.5	368	0.13	0.027, 0.228	0.013
LINC00668	INO80C	2.5	368	0.13	0.027, 0.228	0.013
LINC00668	MAGEC3	2.49	368	0.13	0.027, 0.228	0.013
LINC00668	SNUPN	2.49	368	0.13	0.027, 0.228	0.013
LINC00668	CHUK	-2.49	368	-0.13	-0.228, -0.027	0.013
LINC00668	SLC6A12	-2.49	368	-0.13	-0.228, -0.027	0.013
LINC00668	BMP2K	-2.49	368	-0.13	-0.228, -0.027	0.0131
LINC00668	GPCPD1	-2.49	368	-0.13	-0.228, -0.027	0.0131
LINC00668	EFCAB7	2.49	368	0.13	0.027, 0.228	0.0131
LINC00668	PM20D2	2.49	368	0.13	0.027, 0.228	0.0131
LINC00668	BAAT	-2.49	368	-0.13	-0.228, -0.027	0.0131
LINC00668	NFATC2IP	2.49	368	0.13	0.027, 0.228	0.0131
LINC00668	ZNF768	2.49	368	0.13	0.027, 0.228	0.0131
LINC00668	CATSPERE	-2.49	368	-0.13	-0.228, -0.027	0.0132
LINC00668	OLFML2A	-2.49	368	-0.13	-0.228, -0.027	0.0132
LINC00668	ADAMTS1	-2.49	368	-0.13	-0.228, -0.027	0.0132
LINC00668	CLEC9A	-2.49	368	-0.13	-0.228, -0.027	0.0132
LINC00668	BBS4	2.49	368	0.13	0.027, 0.228	0.0132
LINC00668	TRIT1	2.49	368	0.13	0.027, 0.228	0.0132
LINC00668	RPH3AL	-2.49	368	-0.13	-0.228, -0.027	0.0132
LINC00668	RPS27L	-2.49	368	-0.13	-0.228, -0.027	0.0132
LINC00668	TTC9C	2.49	368	0.13	0.027, 0.228	0.0133
LINC00668	SLK	-2.49	368	-0.13	-0.228, -0.027	0.0133
LINC00668	PCDHB1	2.49	368	0.13	0.027, 0.228	0.0133
LINC00668	NACA2	2.49	368	0.13	0.027, 0.227	0.0134
LINC00668	IFT172	2.49	368	0.13	0.027, 0.227	0.0134
LINC00668	TVP23B	-2.48	368	-0.13	-0.227, -0.027	0.0134
LINC00668	CDC7	2.48	368	0.13	0.027, 0.227	0.0134
LINC00668	ARHGAP6	-2.48	368	-0.13	-0.227, -0.027	0.0134
LINC00668	CDYL2	-2.49	368	-0.13	-0.227, -0.027	0.0134
LINC00668	SNAI1	-2.48	368	-0.13	-0.227, -0.027	0.0135
LINC00668	USP3	2.48	368	0.13	0.027, 0.227	0.0135
LINC00668	TSC22D3	-2.48	368	-0.13	-0.227, -0.027	0.0135
LINC00668	MED11	-2.48	368	-0.13	-0.227, -0.027	0.0136
LINC00668	MCOLN1	-2.48	368	-0.13	-0.227, -0.027	0.0136
LINC00668	CGN	2.48	368	0.13	0.027, 0.227	0.0136
LINC00668	CXCL12	-2.48	368	-0.13	-0.227, -0.027	0.0136
LINC00668	GAGE12J	2.48	368	0.13	0.027, 0.227	0.0136
LINC00668	EQTN	-2.48	368	-0.13	-0.227, -0.026	0.0137
LINC00668	TGFB1I1	-2.48	368	-0.13	-0.227, -0.026	0.0137
LINC00668	SHC2	-2.48	368	-0.13	-0.227, -0.026	0.0137
LINC00668	C14orf159	-2.48	368	-0.13	-0.227, -0.026	0.0137
LINC00668	CDC42EP3	-2.48	368	-0.13	-0.227, -0.026	0.0137
LINC00668	ZNF296	2.48	368	0.13	0.026, 0.227	0.0137
LINC00668	PSMD4	2.47	368	0.13	0.026, 0.227	0.0138
LINC00668	CCDC146	-2.47	368	-0.13	-0.227, -0.026	0.0138
LINC00668	CBLN1	-2.47	368	-0.13	-0.227, -0.026	0.0138
LINC00668	CANT1	2.47	368	0.13	0.026, 0.227	0.0138
LINC00668	SEC13	2.47	368	0.13	0.026, 0.227	0.0138
LINC00668	NPM1	2.48	368	0.13	0.026, 0.227	0.0138
LINC00668	TSPAN9	-2.47	368	-0.13	-0.227, -0.026	0.0138
LINC00668	RORA	-2.47	368	-0.13	-0.227, -0.026	0.0139
LINC00668	ARMCX6	2.47	368	0.13	0.026, 0.227	0.0139
LINC00668	NFYB	-2.47	368	-0.13	-0.227, -0.026	0.014
LINC00668	HECW1	2.47	368	0.13	0.026, 0.227	0.014
LINC00668	AC055811.2	-2.47	368	-0.13	-0.227, -0.026	0.014
LINC00668	ODF3L1	2.47	368	0.13	0.026, 0.227	0.014
LINC00668	INAFM2	-2.47	368	-0.13	-0.227, -0.026	0.014
LINC00668	CARMIL3	2.47	368	0.13	0.026, 0.227	0.014
LINC00668	BTNL9	-2.47	368	-0.13	-0.227, -0.026	0.014
LINC00668	PRELID1	2.47	368	0.13	0.026, 0.226	0.0141
LINC00668	MCHR1	2.47	368	0.13	0.026, 0.227	0.0141
LINC00668	CIAO1	2.47	368	0.13	0.026, 0.226	0.0141
LINC00668	PLPP3	-2.47	368	-0.13	-0.226, -0.026	0.0141
LINC00668	ZBTB7A	-2.47	368	-0.13	-0.227, -0.026	0.0141
LINC00668	TMEM205	-2.47	368	-0.13	-0.227, -0.026	0.0141
LINC00668	DTL	2.47	368	0.13	0.026, 0.227	0.0141
LINC00668	TONSL	2.47	368	0.13	0.026, 0.227	0.0141
LINC00668	SLC36A1	2.47	368	0.13	0.026, 0.227	0.0141
LINC00668	RCAN1	-2.47	368	-0.13	-0.227, -0.026	0.0141
LINC00668	LIMS1	2.46	368	0.13	0.026, 0.226	0.0142
LINC00668	IL6ST	-2.46	368	-0.13	-0.226, -0.026	0.0142
LINC00668	PPARG	2.46	368	0.13	0.026, 0.226	0.0142
LINC00668	BTRC	-2.46	368	-0.13	-0.226, -0.026	0.0142
LINC00668	MICU3	-2.46	368	-0.13	-0.226, -0.026	0.0143
LINC00668	SAMD8	-2.46	368	-0.13	-0.226, -0.026	0.0143
LINC00668	HYAL2	-2.46	368	-0.13	-0.226, -0.026	0.0143
LINC00668	EIF2B4	2.46	368	0.13	0.026, 0.226	0.0143
LINC00668	TMEM56-RWDD3	2.46	368	0.13	0.026, 0.226	0.0144
LINC00668	CDC27	2.46	368	0.13	0.026, 0.226	0.0144
LINC00668	TCF7L2	-2.46	368	-0.13	-0.226, -0.026	0.0144
LINC00668	CCL14	-2.46	368	-0.13	-0.226, -0.026	0.0144
LINC00668	EIF2B3	2.46	368	0.13	0.026, 0.226	0.0144
LINC00668	GIMAP1	-2.46	368	-0.13	-0.226, -0.026	0.0144
LINC00668	ABCA9	-2.46	368	-0.13	-0.226, -0.026	0.0144
LINC00668	SPNS1	2.46	368	0.13	0.026, 0.226	0.0144
LINC00668	COQ3	2.46	368	0.13	0.025, 0.226	0.0145
LINC00668	C19orf84	2.46	368	0.13	0.025, 0.226	0.0145
LINC00668	INSIG1	-2.46	368	-0.13	-0.226, -0.025	0.0145
LINC00668	GADD45G	-2.46	368	-0.13	-0.226, -0.025	0.0145
LINC00668	WDR83OS	-2.46	368	-0.13	-0.226, -0.025	0.0145
LINC00668	MROH8	-2.46	368	-0.13	-0.226, -0.025	0.0145
LINC00668	ACTA2	-2.45	368	-0.13	-0.226, -0.025	0.0146
LINC00668	HMGA1	2.45	368	0.13	0.025, 0.226	0.0147
LINC00668	TMPPE	2.45	368	0.13	0.025, 0.226	0.0147
LINC00668	ALAS1	-2.45	368	-0.13	-0.226, -0.025	0.0147
LINC00668	SLITRK1	2.45	368	0.13	0.025, 0.226	0.0147
LINC00668	TM4SF18	-2.45	368	-0.13	-0.226, -0.025	0.0147
LINC00668	FAM184A	2.45	368	0.13	0.025, 0.226	0.0148
LINC00668	RASAL2	-2.45	368	-0.13	-0.226, -0.025	0.0148
LINC00668	SMIM8	2.45	368	0.13	0.025, 0.226	0.0148
LINC00668	FAM175B	-2.45	368	-0.13	-0.226, -0.025	0.0148
LINC00668	EPB41L4B	-2.45	368	-0.13	-0.226, -0.025	0.0148
LINC00668	NLGN4X	2.45	368	0.13	0.025, 0.226	0.0148
LINC00668	FAT4	-2.45	368	-0.13	-0.226, -0.025	0.0148
LINC00668	PANK1	-2.45	368	-0.13	-0.226, -0.025	0.0149
LINC00668	DACT3	-2.45	368	-0.13	-0.226, -0.025	0.0149
LINC00668	PABPC4	2.45	368	0.13	0.025, 0.226	0.0149
LINC00668	GPR135	-2.44	368	-0.13	-0.225, -0.025	0.015
LINC00668	ZNF487	-2.44	368	-0.13	-0.225, -0.025	0.015
LINC00668	ALOX15B	2.44	368	0.13	0.025, 0.225	0.015
LINC00668	DTX1	-2.44	368	-0.13	-0.225, -0.025	0.0151
LINC00668	ZDHHC15	2.44	368	0.13	0.025, 0.225	0.0151
LINC00668	TBPL1	2.44	368	0.13	0.025, 0.225	0.0151
LINC00668	MESP2	2.44	368	0.13	0.025, 0.225	0.0151
LINC00668	SNX8	2.44	368	0.13	0.025, 0.225	0.0151
LINC00668	RWDD3	2.44	368	0.13	0.024, 0.225	0.0152
LINC00668	SLC9A3R2	-2.44	368	-0.13	-0.225, -0.025	0.0152
LINC00668	ZNF695	2.44	368	0.13	0.024, 0.225	0.0152
LINC00668	DMRTA1	-2.44	368	-0.13	-0.225, -0.024	0.0152
LINC00668	EPS8L3	2.44	368	0.13	0.024, 0.225	0.0152
LINC00668	ERGIC3	2.44	368	0.13	0.025, 0.225	0.0152
LINC00668	TTC22	2.44	368	0.13	0.025, 0.225	0.0152
LINC00668	ZNF611	2.43	368	0.13	0.024, 0.225	0.0154
LINC00668	EFHD2	2.43	368	0.13	0.024, 0.225	0.0154
LINC00668	GART	2.43	368	0.13	0.024, 0.225	0.0154
LINC00668	MAGEA10	2.43	368	0.13	0.024, 0.225	0.0154
LINC00668	IKZF5	-2.43	368	-0.13	-0.225, -0.024	0.0154
LINC00668	ALG1L2	-2.43	368	-0.13	-0.225, -0.024	0.0155
LINC00668	MBOAT1	2.43	368	0.13	0.024, 0.225	0.0155
LINC00668	ZNF385B	-2.43	368	-0.13	-0.225, -0.024	0.0155
LINC00668	TXNL4A	2.43	368	0.13	0.024, 0.225	0.0155
LINC00668	TXN	2.43	368	0.13	0.024, 0.225	0.0155
LINC00668	THAP3	2.43	368	0.13	0.024, 0.225	0.0155
LINC00668	STOM	-2.43	368	-0.13	-0.225, -0.024	0.0155
LINC00668	THOP1	-2.43	368	-0.13	-0.225, -0.024	0.0155
LINC00668	HS3ST3B1	-2.43	368	-0.13	-0.225, -0.024	0.0155
LINC00668	OSBP	-2.43	368	-0.13	-0.225, -0.024	0.0156
LINC00668	ZFP69	2.43	368	0.13	0.024, 0.225	0.0156
LINC00668	NEK4	2.43	368	0.13	0.024, 0.225	0.0156
LINC00668	BIVM	-2.43	368	-0.13	-0.225, -0.024	0.0156
LINC00668	FAM163A	2.43	368	0.13	0.024, 0.225	0.0157
LINC00668	EXO5	2.43	368	0.13	0.024, 0.225	0.0157
LINC00668	LRRC4	-2.43	368	-0.13	-0.225, -0.024	0.0157
LINC00668	SENP5	2.43	368	0.13	0.024, 0.225	0.0157
LINC00668	TK2	-2.43	368	-0.13	-0.225, -0.024	0.0157
LINC00668	AGAP9	-2.42	368	-0.13	-0.224, -0.024	0.0158
LINC00668	LDLRAP1	2.42	368	0.13	0.024, 0.224	0.0158
LINC00668	PSMD7	2.42	368	0.13	0.024, 0.224	0.0158
LINC00668	PDZD9	-2.43	368	-0.13	-0.225, -0.024	0.0158
LINC00668	PHF13	2.42	368	0.13	0.024, 0.224	0.0158
LINC00668	POLR2G	2.42	368	0.13	0.024, 0.224	0.0158
LINC00668	LBR	2.42	368	0.13	0.024, 0.224	0.0158
LINC00668	ZNF138	2.42	368	0.13	0.024, 0.224	0.0158
LINC00668	DDB1	2.42	368	0.13	0.024, 0.224	0.0159
LINC00668	FAM198B	-2.42	368	-0.13	-0.224, -0.024	0.0159
LINC00668	C1orf123	2.42	368	0.13	0.024, 0.224	0.0159
LINC00668	HSD17B7	-2.42	368	-0.13	-0.224, -0.024	0.0159
LINC00668	ITGB1BP1	2.42	368	0.13	0.024, 0.224	0.0159
LINC00668	ZMAT2	2.42	368	0.13	0.023, 0.224	0.016
LINC00668	PHF11	-2.42	368	-0.13	-0.224, -0.024	0.016
LINC00668	GOLGA8R	-2.42	368	-0.13	-0.224, -0.024	0.016
LINC00668	RPL30	2.42	368	0.13	0.023, 0.224	0.016
LINC00668	CFI	-2.42	368	-0.13	-0.224, -0.023	0.0161
LINC00668	C11orf52	2.42	368	0.13	0.023, 0.224	0.0161
LINC00668	CENPS	2.42	368	0.13	0.023, 0.224	0.0161
LINC00668	MAZ	2.41	368	0.12	0.023, 0.224	0.0162
LINC00668	KIF5A	2.42	368	0.12	0.023, 0.224	0.0162
LINC00668	SMC4	2.42	368	0.12	0.023, 0.224	0.0162
LINC00668	NPAP1	2.41	368	0.12	0.023, 0.224	0.0162
LINC00668	EFL1	2.42	368	0.12	0.023, 0.224	0.0162
LINC00668	RPAP1	2.42	368	0.12	0.023, 0.224	0.0162
LINC00668	GCA	2.41	368	0.12	0.023, 0.224	0.0162
LINC00668	GPX2	2.42	368	0.12	0.023, 0.224	0.0162
LINC00668	ZBED8	2.41	368	0.12	0.023, 0.224	0.0163
LINC00668	RBM41	2.41	368	0.12	0.023, 0.224	0.0163
LINC00668	HGFAC	-2.41	368	-0.12	-0.224, -0.023	0.0164
LINC00668	PDE6A	2.41	368	0.12	0.023, 0.224	0.0165
LINC00668	SIN3A	2.41	368	0.12	0.023, 0.224	0.0165
LINC00668	LRRC10B	-2.41	368	-0.12	-0.224, -0.023	0.0165
LINC00668	ARVCF	2.41	368	0.12	0.023, 0.224	0.0166
LINC00668	SAE1	2.41	368	0.12	0.023, 0.224	0.0166
LINC00668	ADK	-2.41	368	-0.12	-0.224, -0.023	0.0166
LINC00668	TLE2	-2.41	368	-0.12	-0.224, -0.023	0.0166
LINC00668	GALNT15	-2.4	368	-0.12	-0.223, -0.023	0.0168
LINC00668	RCBTB2	-2.4	368	-0.12	-0.223, -0.023	0.0168
LINC00668	TMEM217	-2.4	368	-0.12	-0.223, -0.023	0.0168
LINC00668	SIK2	-2.4	368	-0.12	-0.223, -0.023	0.0168
LINC00668	GSTM3	2.4	368	0.12	0.023, 0.223	0.0168
LINC00668	BCO2	-2.4	368	-0.12	-0.223, -0.022	0.0169
LINC00668	NCL	2.4	368	0.12	0.022, 0.223	0.0169
LINC00668	INMT	-2.4	368	-0.12	-0.223, -0.023	0.0169
LINC00668	REXO1	-2.4	368	-0.12	-0.223, -0.022	0.0169
LINC00668	POU5F1B	-2.4	368	-0.12	-0.223, -0.022	0.0169
[truncated: 15,668 more rows]

## Sheet: Table SII
Table SII. Results of potential drug targets of LINC00668 for hepatocellular carcinoma.
Rank	cmap name	mean	n	enrichment	p	specificity	percent non-null
1	sulfaphenazole	0.413	4	0.828	0.00133	0	50
2	STOCK1N-35874	-0.82	2	-0.974	0.00139	0.0066	100
3	mimosine	-0.47	3	-0.9	0.00188	0	66
4	chlorhexidine	0.649	5	0.752	0.00228	0	80
5	disopyramide	-0.375	4	-0.794	0.00358	0.0118	50
6	lidocaine	-0.441	5	-0.72	0.00374	0.0056	60
7	NU-1025	-0.585	2	-0.947	0.00622	0.0107	100
8	alimemazine	0.642	4	0.72	0.01247	0.0242	75
9	esculin	0.46	4	0.718	0.01307	0	50
10	bumetanide	-0.39	4	-0.692	0.0193	0.0878	50
11	5279552	-0.436	2	-0.9	0.02014	0.0179	50
12	nifurtimox	0.42	4	0.651	0.03465	0.0278	50
13	16-phenyltetranorprostaglandin E2	0.38	4	0.649	0.03591	0	50
14	bisoprolol	-0.429	4	-0.622	0.05093	0.0442	50
15	mifepristone	-0.416	4	-0.597	0.06959	0.0506	50
16	emetine	-0.382	4	-0.588	0.0779	0.4941	50
17	stachydrine	-0.42	4	-0.586	0.07961	0.0186	50
18	pirlindole	0.327	3	0.657	0.08152	0.0667	66
19	harmalol	0.57	3	0.643	0.09306	0.0791	66
20	ketoconazole	0.445	4	0.563	0.09941	0.106	50
21	albendazole	-0.505	3	-0.623	0.11205	0.1714	66
22	harpagoside	0.408	4	0.544	0.12097	0.2258	50
23	cobalt chloride	0.424	3	0.602	0.14027	0.0973	66
24	loxapine	0.368	4	0.504	0.17621	0.2075	50
25	orciprenaline	-0.448	4	-0.494	0.19591	0.1643	50
26	tiaprofenic acid	0.444	4	0.483	0.21212	0.1689	50
27	azaperone	-0.438	4	-0.481	0.2202	0.2544	50
28	SC-19220	0.438	4	0.476	0.22646	0.1796	50
29	sulfamethizole	0.343	4	0.471	0.23541	0.1111	50
30	econazole	0.198	4	0.47	0.23782	0.4872	50
31	MK-886	-0.272	2	-0.65	0.24607	0.1921	50
32	chloropyrazine	0.408	4	0.464	0.25175	0.462	50
33	thiethylperazine	0.402	4	0.464	0.25244	0.2967	50
34	chlorambucil	-0.36	4	-0.454	0.28075	0.3312	50
35	AH-6809	-0.392	2	-0.626	0.28126	0.324	50
36	ketorolac	-0.38	4	-0.447	0.2968	0.4124	50
37	Prestwick-857	0.364	4	0.442	0.30464	0.4968	50
38	rotenone	0.305	4	0.433	0.33132	0.4561	50
39	cromoglicic acid	0.103	2	0.496	0.51497	0.4733	50
40	Y-27632	-0.449	2	-0.495	0.51958	0.7596	50
41	5255229	-0.44	2	-0.493	0.52535	0.3771	50
42	5182598	-0.428	2	-0.488	0.54491	0.7987	50
43	5224221	-0.406	2	-0.48	0.57668	0.7444	50
44	exisulind	0.369	2	0.454	0.66651	0.6522	50
45	calmidazolium	-0.278	2	-0.446	0.69518	0.7213	50
46	clofibrate	0.343	2	0.444	0.69923	0.7333	50
47	arachidonyltrifluoromethane	0.329	2	0.441	0.7073	0.8302	50
48	5151277	0.845	1	0.982	---	---	100
49	dimethyloxalylglycine	0.814	1	0.974	---	---	100
50	demecolcine	-0.707	1	-0.96	---	---	100
51	gefitinib	-0.676	1	-0.956	---	---	100
52	tioguanine	-0.658	1	-0.953	---	---	100
53	HNMPA-(AM)3	0.634	1	0.939	---	---	100
54	1,5-isoquinolinediol	0.617	1	0.937	---	---	100
55	DL-PPMP	0	1	-0.917	---	---	0
56	cantharidin	0	1	0.914	---	---	0
57	isoflupredone	0	3	-0.907	---	---	0
58	adiphenine	0	5	-0.897	---	---	0
59	2-aminobenzenesulfonamide	-0.206	4	-0.893	---	---	25
60	tracazolate	0.235	4	0.892	---	---	25
61	BW-B70C	0	1	-0.883	---	---	0
62	sanguinarine	0	2	0.882	---	---	0
63	tyrphostin AG-1478	0	1	-0.875	---	---	0
64	DL-thiorphan	0	2	0.865	---	---	0
65	chrysin	0	3	0.86	---	---	0
66	scopoletin	0	2	0.847	---	---	0
67	5152487	0	1	0.844	---	---	0
68	sulconazole	0	4	0.844	---	---	0
69	Prestwick-692	0	4	-0.843	---	---	0
70	thioguanosine	0	4	0.829	---	---	0
71	calcium folinate	0	5	-0.825	---	---	0
72	reserpine	0.184	3	0.824	---	---	33
73	viomycin	0	4	-0.824	---	---	0
74	5186324	0	1	-0.823	---	---	0
75	milrinone	0	3	0.818	---	---	0
76	topiramate	0	1	-0.818	---	---	0
77	iloprost	-0.207	3	-0.817	---	---	33
78	ethionamide	-0.284	3	-0.816	---	---	33
79	iopamidol	-0.187	4	-0.815	---	---	25
80	penbutolol	0	3	-0.811	---	---	0
81	Prestwick-1082	0	3	-0.809	---	---	0
82	5149715	0	1	-0.805	---	---	0
83	aminocaproic acid	0.306	3	0.804	---	---	33
84	luteolin	0	4	0.802	---	---	0
85	dexverapamil	0	1	0.797	---	---	0
86	vinblastine	-0.21	3	-0.797	---	---	33
87	azapropazone	-0.293	3	-0.794	---	---	33
88	streptozocin	-0.189	4	-0.792	---	---	25
89	decitabine	0	1	-0.791	---	---	0
90	5186223	0	1	-0.79	---	---	0
91	dacarbazine	0.216	4	0.789	---	---	25
92	menadione	0	2	0.786	---	---	0
93	etofenamate	0.227	4	0.781	---	---	25
94	phthalylsulfathiazole	0	5	0.78	---	---	0
95	azacitidine	0	3	0.776	---	---	0
96	piromidic acid	0.178	4	0.767	---	---	25
97	apigenin	0	4	0.766	---	---	0
98	trimethobenzamide	0	5	-0.758	---	---	0
99	Prestwick-691	0	3	-0.757	---	---	0
100	Prestwick-983	0	3	-0.756	---	---	0
101	lisuride	0	5	-0.755	---	---	0
102	lymecycline	0.172	4	0.75	---	---	25
103	piperlongumine	0	2	0.748	---	---	0
104	benzbromarone	0	3	-0.748	---	---	0
105	8-azaguanine	0	4	0.747	---	---	0
106	monensin	0	6	-0.746	---	---	0
107	tomelukast	0	1	-0.744	---	---	0
108	ribavirin	-0.209	4	-0.743	---	---	25
109	U0125	0	1	-0.743	---	---	0
110	Prestwick-1084	0	4	0.742	---	---	0
111	benzthiazide	0.227	4	0.742	---	---	25
112	camptothecin	0	3	0.737	---	---	0
113	racecadotril	-0.214	4	-0.737	---	---	25
114	GW-8510	0	4	0.734	---	---	0
115	STOCK1N-35696	0	2	-0.734	---	---	0
116	2-deoxy-D-glucose	0	1	-0.73	---	---	0
117	triflusal	0	3	0.729	---	---	0
118	splitomicin	0	1	-0.728	---	---	0
119	heptaminol	0	5	-0.728	---	---	0
120	ginkgolide A	0	4	0.727	---	---	0
121	bromperidol	0.24	3	0.724	---	---	33
122	5248896	0	2	0.723	---	---	0
123	verteporfin	0	3	0.722	---	---	0
124	3-acetamidocoumarin	0	4	-0.721	---	---	0
125	tyrphostin AG-825	0	1	0.721	---	---	0
126	clemastine	0	3	-0.721	---	---	0
127	tranexamic acid	0	5	-0.72	---	---	0
128	gliclazide	0	4	0.719	---	---	0
129	thiamphenicol	0	5	-0.718	---	---	0
130	demecarium bromide	0	4	-0.718	---	---	0
131	atractyloside	0	5	-0.717	---	---	0
132	meteneprost	-0.218	4	-0.716	---	---	25
133	piperidolate	0	3	0.716	---	---	0
134	piracetam	0.219	4	0.714	---	---	25
135	nadolol	0	4	-0.713	---	---	0
136	celastrol	0	1	0.708	---	---	0
137	hexestrol	0	4	0.705	---	---	0
138	furazolidone	-0.191	4	-0.702	---	---	25
139	podophyllotoxin	0	4	-0.702	---	---	0
140	phenyl biguanide	0	1	-0.701	---	---	0
141	phenanthridinone	0	1	-0.7	---	---	0
142	estriol	0	4	0.699	---	---	0
143	methocarbamol	0.271	3	0.695	---	---	33
144	sulmazole	0	3	-0.695	---	---	0
145	timolol	0	4	-0.693	---	---	0
146	12,13-EODE	0	1	-0.693	---	---	0
147	trazodone	0	3	0.691	---	---	0
148	terazosin	0	4	-0.69	---	---	0
149	5162773	0	1	0.69	---	---	0
150	guanadrel	-0.149	5	-0.689	---	---	20
151	trihexyphenidyl	0	3	-0.689	---	---	0
152	repaglinide	0	4	0.688	---	---	0
153	napelline	0.175	4	0.688	---	---	25
154	naringenin	0	4	-0.683	---	---	0
155	doxazosin	0	4	0.682	---	---	0
156	crotamiton	0.138	4	0.682	---	---	25
157	rimexolone	0	4	0.682	---	---	0
158	merbromin	-0.148	5	-0.679	---	---	20
159	tranylcypromine	0.159	5	0.678	---	---	20
160	ikarugamycin	0	3	-0.676	---	---	0
161	ajmaline	0	3	-0.676	---	---	0
162	1,4-chrysenequinone	0	2	0.675	---	---	0
163	alsterpaullone	0	3	0.675	---	---	0
164	biperiden	0	5	-0.674	---	---	0
165	bacampicillin	-0.218	4	-0.671	---	---	25
166	aciclovir	0	6	-0.67	---	---	0
167	5114445	0	1	0.67	---	---	0
168	cytochalasin B	0	1	-0.669	---	---	0
169	sulfadoxine	0	3	0.668	---	---	0
170	carbimazole	-0.28	3	-0.667	---	---	33
171	ebselen	0	3	0.662	---	---	0
172	imatinib	0	2	-0.661	---	---	0
173	dapsone	0	5	-0.66	---	---	0
174	guanethidine	0.268	3	0.658	---	---	33
175	ouabain	0.176	4	0.657	---	---	25
176	etamsylate	0	4	0.656	---	---	0
177	oligomycin	0	1	-0.656	---	---	0
178	W-13	0	2	-0.656	---	---	0
179	Prestwick-1103	0	4	-0.655	---	---	0
180	cefamandole	0	4	-0.654	---	---	0
181	piroxicam	0.179	4	0.654	---	---	25
182	Gly-His-Lys	0	3	-0.654	---	---	0
183	oxolamine	-0.239	4	-0.652	---	---	25
184	phenoxybenzamine	0	4	0.651	---	---	0
185	bisacodyl	0	4	0.651	---	---	0
186	fenoterol	0	3	0.649	---	---	0
187	hydrocotarnine	0.186	4	0.649	---	---	25
188	doxepin	0.281	3	0.647	---	---	33
189	protoveratrine A	0.207	4	0.645	---	---	25
190	sulfametoxydiazine	0	4	0.645	---	---	0
191	felbinac	0	4	-0.643	---	---	0
192	furaltadone	0.128	6	0.643	---	---	16
193	levomepromazine	0	4	-0.64	---	---	0
194	anisomycin	-0.248	4	-0.638	---	---	25
195	gentamicin	0	4	-0.638	---	---	0
196	etiocholanolone	0	6	-0.638	---	---	0
197	fisetin	0	1	0.637	---	---	0
198	ambroxol	0	4	-0.636	---	---	0
199	carteolol	0	4	-0.635	---	---	0
200	4,5-dianilinophthalimide	0	2	0.634	---	---	0
201	gabexate	0	4	-0.634	---	---	0
202	harmine	-0.187	4	0.633	---	---	0
203	cortisone	0	3	0.632	---	---	0
204	ceforanide	0	4	-0.632	---	---	0
205	canrenoic acid	0.185	4	0.63	---	---	25
206	copper sulfate	0	4	-0.628	---	---	0
207	TTNPB	0	2	-0.628	---	---	0
208	roxarsone	0	4	0.627	---	---	0
209	maprotiline	0	4	-0.626	---	---	0
210	doxorubicin	0	3	0.624	---	---	0
211	betulinic acid	0	4	-0.623	---	---	0
212	carbachol	-0.165	4	0.622	---	---	0
213	indoprofen	0	4	-0.622	---	---	0
214	eticlopride	0	4	-0.622	---	---	0
215	benzocaine	0	4	-0.621	---	---	0
216	fasudil	0	2	-0.618	---	---	0
217	cefotiam	0	4	-0.615	---	---	0
218	5666823	0	1	-0.613	---	---	0
219	metyrapone	0	4	0.613	---	---	0
220	pyrithyldione	0	4	-0.613	---	---	0
221	melatonin	0	4	-0.612	---	---	0
222	meticrane	0	5	0.611	---	---	0
223	mitoxantrone	0	3	0.611	---	---	0
224	blebbistatin	0	2	0.611	---	---	0
225	epiandrosterone	0.153	4	0.611	---	---	25
226	pararosaniline	0	1	0.61	---	---	0
227	PHA-00665752	0	1	0.609	---	---	0
228	scriptaid	-0.245	3	-0.609	---	---	33
229	naftopidil	0.21	3	0.609	---	---	33
230	aconitine	-0.155	4	-0.609	---	---	25
231	skimmianine	0	4	0.608	---	---	0
232	denatonium benzoate	0	4	0.606	---	---	0
233	tetroquinone	0.033	4	0.604	---	---	25
234	oxamic acid	0	1	-0.603	---	---	0
235	sodium phenylbutyrate	-0.083	7	-0.603	---	---	14
236	aminophenazone	0.164	5	0.602	---	---	20
237	tetracycline	0	5	-0.602	---	---	0
238	H-7	0	4	0.6	---	---	0
239	nomifensine	0.18	5	0.598	---	---	20
240	xamoterol	0	3	-0.595	---	---	0
241	ondansetron	0	4	-0.595	---	---	0
242	Prestwick-1083	0.315	3	0.595	---	---	33
243	talampicillin	0	4	0.594	---	---	0
244	ciclopirox	0	4	-0.594	---	---	0
245	cytisine	-0.182	4	-0.594	---	---	25
246	streptomycin	-0.164	4	-0.594	---	---	25
247	sulindac	-0.346	7	-0.594	---	---	42
248	sulfadimethoxine	0.123	5	-0.593	---	---	0
249	quipazine	-0.183	4	-0.593	---	---	25
250	cephaeline	0	5	-0.592	---	---	0
251	valinomycin	0	4	-0.589	---	---	0
252	isoxicam	0.159	5	-0.588	---	---	0
253	halofantrine	0	3	-0.587	---	---	0
254	3-aminobenzamide	0	1	0.587	---	---	0
255	rottlerin	0	3	0.587	---	---	0
256	Prestwick-642	0	4	-0.585	---	---	0
257	Prestwick-860	0	4	0.584	---	---	0
258	folic acid	0	4	-0.584	---	---	0
259	ampyrone	0	5	-0.583	---	---	0
260	5140203	0	1	0.583	---	---	0
261	exemestane	0	1	0.583	---	---	0
262	bepridil	0	4	0.583	---	---	0
263	sulindac sulfide	0	1	-0.582	---	---	0
264	monobenzone	0	4	0.582	---	---	0
265	methyldopate	0	4	-0.581	---	---	0
266	5286656	0	1	-0.58	---	---	0
267	furosemide	-0.052	4	-0.579	---	---	25
268	(+)-isoprenaline	0.244	4	0.577	---	---	25
269	riboflavin	0	4	0.577	---	---	0
270	liothyronine	0	4	0.576	---	---	0
271	vidarabine	0	4	0.575	---	---	0
272	ioversol	0.088	4	0.575	---	---	25
273	difenidol	0	3	0.574	---	---	0
274	oxprenolol	0	4	0.574	---	---	0
275	PHA-00816795	0	2	-0.573	---	---	0
276	nipecotic acid	0	4	0.573	---	---	0
277	iohexol	0	4	-0.572	---	---	0
278	omeprazole	0	4	0.572	---	---	0
279	vigabatrin	0	3	-0.571	---	---	0
280	sulfamonomethoxine	0.082	4	-0.571	---	---	25
281	imidurea	0	3	0.57	---	---	0
282	quinpirole	0.191	4	-0.57	---	---	0
283	nitrofural	0	4	-0.568	---	---	0
284	prednicarbate	-0.222	3	-0.568	---	---	33
285	dextromethorphan	-0.162	4	0.568	---	---	0
286	vincamine	0	6	-0.567	---	---	0
287	mesoridazine	0.189	4	0.567	---	---	25
288	pentoxyverine	0	4	0.566	---	---	0
289	antimycin A	0	5	0.566	---	---	0
290	oxyphenbutazone	-0.216	4	-0.566	---	---	25
291	diphenhydramine	0	5	-0.565	---	---	0
292	piribedil	0	4	0.564	---	---	0
293	nabumetone	0	4	0.563	---	---	0
294	metampicillin	0	5	-0.561	---	---	0
295	valdecoxib	0	3	-0.56	---	---	0
296	cyclobenzaprine	-0.043	4	-0.558	---	---	25
297	etomidate	0	3	0.558	---	---	0
298	tetracaine	0	3	-0.557	---	---	0
299	drofenine	0	4	0.557	---	---	0
300	betulin	0	3	-0.556	---	---	0
301	terfenadine	0	3	0.556	---	---	0
302	vancomycin	0.238	4	-0.555	---	---	0
303	dihydroergocristine	0	4	-0.552	---	---	0
304	ipratropium bromide	0	3	0.551	---	---	0
305	isoniazid	0	5	-0.551	---	---	0
306	0175029-0000	0	6	0.55	---	---	0
307	adrenosterone	0	4	0.547	---	---	0
308	mecamylamine	0.288	3	0.546	---	---	33
309	canadine	0.124	4	-0.545	---	---	0
310	apomorphine	0	5	0.544	---	---	0
311	gramine	0.148	4	0.544	---	---	25
312	alcuronium chloride	0	2	0.543	---	---	0
313	promazine	0	6	0.543	---	---	0
314	dopamine	0	1	-0.542	---	---	0
315	apramycin	-0.202	4	0.542	---	---	0
316	ketotifen	0	4	-0.542	---	---	0
317	budesonide	0.186	4	0.541	---	---	25
318	ursodeoxycholic acid	0	3	0.54	---	---	0
319	diethylstilbestrol	0.009	6	-0.54	---	---	16
320	lisinopril	0	3	0.539	---	---	0
321	cyclic adenosine monophosphate	0	4	-0.539	---	---	0
322	N-phenylanthranilic acid	0	1	-0.539	---	---	0
323	oleandomycin	0.31	5	0.539	---	---	40
324	methylergometrine	0	4	0.538	---	---	0
325	natamycin	0	4	0.538	---	---	0
326	cycloserine	-0.204	4	0.538	---	---	0
327	morantel	0	5	0.537	---	---	0
328	5252917	0	2	0.536	---	---	0
329	MG-132	0	1	-0.536	---	---	0
330	primidone	-0.163	4	-0.536	---	---	25
331	HC toxin	0	1	-0.535	---	---	0
332	medrysone	0	6	0.534	---	---	0
333	paclitaxel	-0.229	6	-0.534	---	---	33
334	aminophylline	0	4	0.534	---	---	0
335	trifluridine	0.214	4	0.533	---	---	25
336	norethisterone	0	4	0.532	---	---	0
337	11-deoxy-16,16-dimethylprostaglandin E2	0.246	4	0.532	---	---	25
338	doxycycline	-0.14	5	-0.532	---	---	20
339	mebhydrolin	0	4	-0.532	---	---	0
340	(-)-catechin	0	1	-0.531	---	---	0
341	pindolol	-0.154	5	-0.531	---	---	20
342	6-azathymine	0	4	0.531	---	---	0
343	IC-86621	0	4	-0.531	---	---	0
344	etifenin	0	4	0.531	---	---	0
345	acemetacin	0	4	-0.53	---	---	0
346	phenazone	0	3	-0.529	---	---	0
347	5194442	-0.162	4	-0.529	---	---	25
348	5155877	-0.182	4	-0.529	---	---	25
349	imipenem	0	4	0.528	---	---	0
350	esculetin	0	3	-0.528	---	---	0
351	propoxycaine	0	4	-0.528	---	---	0
352	proscillaridin	0	3	0.527	---	---	0
353	amoxapine	0.153	5	0.527	---	---	20
354	succinylsulfathiazole	0.14	4	0.527	---	---	25
355	5213008	0	1	-0.527	---	---	0
356	antazoline	0	4	-0.526	---	---	0
357	phenacetin	0.235	4	0.526	---	---	25
358	cetirizine	0	4	0.526	---	---	0
359	(+)-chelidonine	0	4	-0.526	---	---	0
360	10-methoxyharmalan	0	4	-0.524	---	---	0
361	iopromide	0	4	-0.524	---	---	0
362	metronidazole	0.13	5	-0.524	---	---	0
363	meclofenoxate	0.126	6	0.524	---	---	16
364	PF-00539758-00	0.2	3	0.523	---	---	33
365	norcyclobenzaprine	0	4	0.522	---	---	0
366	ellipticine	0	4	0.522	---	---	0
367	isotretinoin	0	4	-0.521	---	---	0
368	ritodrine	0.138	4	0.521	---	---	25
369	ethosuximide	0.237	4	0.521	---	---	25
370	noretynodrel	0.2	4	0.521	---	---	25
371	pentoxifylline	0	5	-0.52	---	---	0
372	dequalinium chloride	0	4	0.52	---	---	0
373	Prestwick-967	0	4	-0.52	---	---	0
374	vinburnine	-0.186	4	-0.52	---	---	25
375	pivampicillin	0	4	0.519	---	---	0
376	Prestwick-665	0	5	0.519	---	---	0
377	chlorphenesin	0.231	4	0.518	---	---	25
378	betaxolol	0	4	0.518	---	---	0
379	chlortalidone	0	4	-0.518	---	---	0
380	minoxidil	-0.136	5	-0.517	---	---	20
381	arcaine	0	4	-0.517	---	---	0
382	atracurium besilate	0.299	3	-0.516	---	---	0
383	isocorydine	-0.238	4	-0.514	---	---	25
384	meclozine	0	5	0.514	---	---	0
385	CP-320650-01	0	8	-0.514	---	---	0
386	mephenytoin	0	4	-0.511	---	---	0
387	zoxazolamine	0.211	4	0.511	---	---	25
388	ivermectin	0.154	5	0.51	---	---	20
389	brinzolamide	-0.232	4	-0.51	---	---	25
390	capsaicin	0	4	0.51	---	---	0
391	amoxicillin	0	4	0.509	---	---	0
392	fluspirilene	0	4	0.509	---	---	0
393	CP-690334-01	-0.079	8	-0.508	---	---	12
394	butirosin	0.19	4	0.507	---	---	25
395	fipexide	0	3	0.507	---	---	0
396	thioperamide	0.149	5	-0.506	---	---	0
397	lovastatin	0	4	-0.506	---	---	0
398	zaprinast	0	4	-0.506	---	---	0
399	colistin	0.201	4	-0.506	---	---	0
400	nomegestrol	0	3	-0.506	---	---	0
401	withaferin A	-0.174	4	-0.505	---	---	25
402	BCB000040	0	4	-0.505	---	---	0
403	thiamazole	0	6	-0.505	---	---	0
404	etacrynic acid	0.238	3	0.505	---	---	33
405	chlorzoxazone	0	4	0.504	---	---	0
406	bergenin	-0.2	4	-0.503	---	---	25
407	5109870	0	1	-0.503	---	---	0
408	AR-A014418	-0.257	3	-0.503	---	---	33
409	prenylamine	-0.014	4	0.503	---	---	25
410	pyrimethamine	-0.161	5	-0.502	---	---	20
411	lasalocid	0.196	4	-0.502	---	---	0
412	ornidazole	0	5	0.502	---	---	0
413	pancuronium bromide	0	4	0.501	---	---	0
414	pheneticillin	-0.017	4	-0.5	---	---	25
415	zomepirac	-0.194	4	0.5	---	---	0
416	procaine	0	5	0.499	---	---	0
417	desipramine	0	4	-0.499	---	---	0
418	ribostamycin	0	4	0.499	---	---	0
419	AG-028671	-0.296	3	-0.498	---	---	33
420	trioxysalen	0	4	0.498	---	---	0
421	5230742	0	2	-0.498	---	---	0
422	dexpanthenol	0.198	4	0.497	---	---	25
423	finasteride	0.114	6	-0.497	---	---	0
424	daunorubicin	0	4	0.497	---	---	0
425	benzathine benzylpenicillin	0	4	-0.497	---	---	0
426	lansoprazole	0	4	-0.496	---	---	0
427	methazolamide	0	4	0.496	---	---	0
428	iocetamic acid	0	4	-0.496	---	---	0
429	metamizole sodium	-0.116	6	0.496	---	---	0
430	co-dergocrine mesilate	0	4	-0.495	---	---	0
431	abamectin	0	4	0.494	---	---	0
432	methylbenzethonium chloride	0.123	6	0.494	---	---	16
433	artemisinin	0	3	0.494	---	---	0
434	lomustine	0	4	-0.493	---	---	0
435	nizatidine	0	4	-0.493	---	---	0
436	pargyline	0	4	0.493	---	---	0
437	metacycline	0	4	0.493	---	---	0
438	nortriptyline	0.179	4	0.492	---	---	25
439	clobetasol	0	3	0.491	---	---	0
440	amitriptyline	0.098	6	-0.491	---	---	0
441	risperidone	0	3	0.491	---	---	0
442	tiletamine	0	4	-0.49	---	---	0
443	naloxone	0.123	6	0.489	---	---	16
444	clofazimine	0	5	-0.488	---	---	0
445	scopolamine N-oxide	0	5	0.488	---	---	0
446	terconazole	0	4	0.488	---	---	0
447	depudecin	0	2	-0.486	---	---	0
448	levobunolol	0.186	4	-0.486	---	---	0
449	memantine	0	4	-0.486	---	---	0
450	berberine	0	4	0.485	---	---	0
451	arecoline	0	4	-0.485	---	---	0
452	hycanthone	0	4	-0.484	---	---	0
453	ethambutol	0.146	5	0.484	---	---	20
454	dexpropranolol	0	3	0.484	---	---	0
455	moxonidine	0	3	0.484	---	---	0
456	glycocholic acid	0	4	-0.483	---	---	0
457	CP-944629	0	4	-0.483	---	---	0
458	levocabastine	0	4	0.483	---	---	0
459	dicycloverine	0.01	5	-0.483	---	---	20
460	tolazamide	0	3	-0.482	---	---	0
461	dipyridamole	0	6	0.482	---	---	0
462	sulfaquinoxaline	0.056	3	-0.481	---	---	33
463	bephenium hydroxynaphthoate	-0.007	5	0.479	---	---	20
464	quinidine	0	3	-0.478	---	---	0
465	fluvoxamine	0	4	0.478	---	---	0
466	clomifene	0	4	0.478	---	---	0
467	remoxipride	0	4	0.478	---	---	0
468	thiostrepton	0	4	0.477	---	---	0
469	bromocriptine	0	5	0.476	---	---	0
470	Prestwick-675	0	4	-0.476	---	---	0
471	hymecromone	-0.155	4	-0.476	---	---	25
472	monastrol	-0.078	8	-0.475	---	---	12
473	salsolinol	0.256	3	0.475	---	---	33
474	prednisone	0	5	-0.475	---	---	0
475	pyrazinamide	0	4	0.474	---	---	0
476	chlorogenic acid	0	4	-0.473	---	---	0
477	ronidazole	0	3	0.473	---	---	0
478	hexetidine	0	4	-0.472	---	---	0
479	lincomycin	-0.29	3	-0.471	---	---	33
480	ofloxacin	-0.337	5	-0.471	---	---	40
481	cefoperazone	0	3	-0.47	---	---	0
482	metanephrine	-0.311	5	-0.47	---	---	40
483	ethisterone	0	6	-0.47	---	---	0
484	iodixanol	0	3	-0.469	---	---	0
485	alexidine	0	4	0.469	---	---	0
486	mefloquine	0	5	0.468	---	---	0
487	articaine	-0.254	3	-0.468	---	---	33
488	mepyramine	0	4	0.466	---	---	0
489	simvastatin	0.21	4	0.466	---	---	25
490	flurbiprofen	0.155	5	0.465	---	---	20
491	levopropoxyphene	0	4	-0.465	---	---	0
492	clonidine	0	4	-0.465	---	---	0
493	pirenperone	0	5	-0.465	---	---	0
494	betahistine	0	4	0.465	---	---	0
495	tolnaftate	0.134	5	-0.464	---	---	0
496	PHA-00745360	0.083	8	-0.463	---	---	0
497	thiocolchicoside	0	4	0.462	---	---	0
498	progesterone	0.222	4	0.461	---	---	25
499	Prestwick-972	0	3	-0.461	---	---	0
500	cefalexin	0	5	0.461	---	---	0
501	N-acetylmuramic acid	0	4	-0.46	---	---	0
502	carmustine	0	3	-0.46	---	---	0
503	latamoxef	0	3	0.46	---	---	0
504	gallamine triethiodide	0.026	5	0.46	---	---	20
505	MS-275	0	2	0.46	---	---	0
506	butoconazole	0.218	4	0.46	---	---	25
507	16,16-dimethylprostaglandin E2	0	3	-0.46	---	---	0
508	chenodeoxycholic acid	0.193	4	-0.459	---	---	0
509	SB-203580	0	5	-0.459	---	---	0
510	eucatropine	0	6	0.459	---	---	0
511	0297417-0002B	0	3	0.458	---	---	0
512	pyrvinium	0	6	0.458	---	---	0
513	paracetamol	0	4	0.458	---	---	0
514	lithocholic acid	0	6	-0.458	---	---	0
515	trimetazidine	0	4	0.458	---	---	0
516	hesperetin	0.175	5	0.457	---	---	20
517	theophylline	0.225	4	0.457	---	---	25
518	pempidine	0	5	0.457	---	---	0
519	cyanocobalamin	0	4	0.456	---	---	0
520	homatropine	0	5	-0.456	---	---	0
521	pridinol	0	4	0.456	---	---	0
522	levonorgestrel	0	6	0.455	---	---	0
523	methacholine chloride	0	3	0.455	---	---	0
524	gabapentin	0	4	-0.455	---	---	0
525	calycanthine	-0.182	4	-0.455	---	---	25
526	pyridoxine	0	4	0.455	---	---	0
527	thapsigargin	0.308	3	-0.454	---	---	0
528	CP-645525-01	0	3	-0.454	---	---	0
529	diltiazem	0	5	0.454	---	---	0
530	lorglumide	0	5	0.453	---	---	0
531	benfotiamine	0	5	0.453	---	---	0
532	staurosporine	0	4	-0.453	---	---	0
533	alpha-yohimbine	0	3	-0.452	---	---	0
534	phentolamine	-0.146	7	-0.452	---	---	28
535	fludrocortisone	0.076	8	-0.452	---	---	0
536	spiperone	0	2	0.451	---	---	0
537	tubocurarine chloride	0.228	4	0.45	---	---	25
538	Prestwick-674	0	6	0.45	---	---	0
539	etoposide	-0.193	4	-0.45	---	---	25
540	nimodipine	0	4	-0.449	---	---	0
541	clomipramine	0	4	0.448	---	---	0
542	pimozide	0	4	-0.448	---	---	0
543	alprenolol	0	4	-0.448	---	---	0
544	meptazinol	0	4	0.448	---	---	0
545	protriptyline	0.221	4	0.448	---	---	25
546	roxithromycin	0	4	0.447	---	---	0
547	azlocillin	0	4	0.447	---	---	0
548	canavanine	0	3	0.447	---	---	0
549	myricetin	0	4	-0.447	---	---	0
550	tocainide	0	4	-0.446	---	---	0
551	amodiaquine	-0.244	4	-0.446	---	---	25
552	N6-methyladenosine	-0.226	4	-0.445	---	---	25
553	tonzonium bromide	-0.187	4	0.444	---	---	0
554	thiamine	0.021	3	-0.444	---	---	33
555	iproniazid	0.151	5	-0.444	---	---	0
556	SB-202190	0	5	0.443	---	---	0
557	flavoxate	-0.155	4	0.443	---	---	0
558	cefepime	0	4	-0.443	---	---	0
559	triflupromazine	0	4	-0.442	---	---	0
560	isopropamide iodide	0	4	0.442	---	---	0
561	sulfamethoxypyridazine	0	5	0.442	---	---	0
562	irinotecan	0	3	0.441	---	---	0
563	Prestwick-864	0.178	4	0.441	---	---	25
564	fluoxetine	0	4	-0.441	---	---	0
565	ramifenazone	0	4	-0.441	---	---	0
566	mercaptopurine	0	2	0.44	---	---	0
567	etodolac	0.185	5	0.44	---	---	20
568	isometheptene	0.192	4	-0.44	---	---	0
569	pheniramine	-0.14	5	-0.439	---	---	20
570	chloroquine	0	4	0.438	---	---	0
571	metoprolol	0	4	-0.438	---	---	0
572	perhexiline	-0.215	4	-0.438	---	---	25
573	homosalate	-0.2	4	-0.438	---	---	25
574	Prestwick-984	-0.205	4	-0.438	---	---	25
575	nalbuphine	0.168	5	0.437	---	---	20
576	H-89	-0.287	3	-0.437	---	---	33
577	proglumide	0.286	5	0.437	---	---	40
578	promethazine	0	4	0.436	---	---	0
579	fendiline	0	3	-0.436	---	---	0
580	amprolium	0.154	5	0.435	---	---	20
581	zidovudine	0	4	-0.435	---	---	0
582	ethaverine	0	4	0.434	---	---	0
583	tribenoside	-0.179	4	-0.433	---	---	25
584	torasemide	0	4	0.433	---	---	0
585	rolitetracycline	-0.199	4	0.433	---	---	0
586	cyproheptadine	0.173	5	0.433	---	---	20
587	decamethonium bromide	0.029	4	-0.432	---	---	25
588	flunarizine	0	4	0.432	---	---	0
589	clioquinol	0	5	0.432	---	---	0
590	AG-013608	-0.078	8	-0.432	---	---	12
591	propafenone	0	4	0.431	---	---	0
592	7-aminocephalosporanic acid	0	4	-0.431	---	---	0
593	proxyphylline	-0.181	4	0.431	---	---	0
594	fenofibrate	0	3	-0.43	---	---	0
595	suramin sodium	-0.21	4	-0.43	---	---	25
596	procainamide	0	4	0.43	---	---	0
597	Prestwick-682	0	4	-0.429	---	---	0
598	glafenine	0.197	4	0.429	---	---	25
599	altretamine	0.185	4	0.429	---	---	25
600	procyclidine	0	4	0.429	---	---	0
601	spiramycin	0.26	6	0.429	---	---	33
602	nisoxetine	-0.18	4	0.429	---	---	0
603	3-nitropropionic acid	0	4	0.428	---	---	0
604	lynestrenol	0.325	5	0.428	---	---	40
605	dantrolene	0	6	-0.428	---	---	0
606	etilefrine	0	4	-0.427	---	---	0
607	niflumic acid	-0.219	4	-0.427	---	---	25
608	halcinonide	0	5	0.427	---	---	0
609	trapidil	0	3	-0.427	---	---	0
610	Chicago Sky Blue 6B	0	4	-0.426	---	---	0
611	levamisole	0	4	0.426	---	---	0
612	N-acetyl-L-leucine	0	4	0.426	---	---	0
613	mometasone	-0.184	4	-0.425	---	---	25
614	aceclofenac	0	4	-0.425	---	---	0
615	methylprednisolone	0	4	0.425	---	---	0
616	dinoprost	0	4	-0.425	---	---	0
617	piperine	-0.222	4	-0.424	---	---	25
618	pronetalol	0	4	0.424	---	---	0
619	mianserin	0.157	5	0.423	---	---	20
620	loracarbef	0	4	-0.423	---	---	0
621	6-bromoindirubin-3'-oxime	-0.117	7	-0.423	---	---	14
622	chlorcyclizine	-0.139	6	-0.423	---	---	16
623	proadifen	0.24	4	0.423	---	---	25
624	cloxacillin	0	4	-0.423	---	---	0
625	chlorpromazine	0.015	19	0.423	---	---	10
626	pramocaine	-0.145	5	-0.423	---	---	20
627	gelsemine	0	4	-0.422	---	---	0
628	dimenhydrinate	-0.21	4	-0.422	---	---	25
629	ganciclovir	0	4	0.422	---	---	0
630	norfloxacin	0	5	0.422	---	---	0
631	methoxamine	0.188	4	-0.422	---	---	0
632	tropine	0	4	-0.422	---	---	0
633	thalidomide	0	7	0.422	---	---	0
634	oxetacaine	0	5	0.421	---	---	0
635	SR-95639A	0.232	4	0.421	---	---	25
636	pseudopelletierine	0	4	0.421	---	---	0
637	tetrandrine	0	4	-0.421	---	---	0
638	clidinium bromide	0	4	-0.421	---	---	0
639	BCB000039	0	3	0.42	---	---	0
640	ifenprodil	0	4	0.42	---	---	0
641	docosahexaenoic acid ethyl ester	0	2	-0.42	---	---	0
642	Prestwick-920	0	4	0.419	---	---	0
643	amiprilose	0.01	4	-0.419	---	---	25
644	genistein	-0.039	17	-0.419	---	---	5
645	etidronic acid	0	4	0.419	---	---	0
646	lobelanidine	0.171	4	0.418	---	---	25
647	disulfiram	0.333	5	0.418	---	---	40
648	mexiletine	-0.14	6	-0.418	---	---	16
649	isosorbide	0	4	-0.418	---	---	0
650	alverine	-0.21	4	-0.418	---	---	25
651	Prestwick-559	0	3	0.417	---	---	0
652	naproxen	0	9	-0.417	---	---	0
653	acepromazine	0	4	0.417	---	---	0
654	quinethazone	0	4	0.416	---	---	0
655	lycorine	0	5	-0.416	---	---	0
656	acetazolamide	0	4	0.416	---	---	0
657	cyproterone	0	4	0.416	---	---	0
658	gliquidone	0	4	-0.415	---	---	0
659	metaraminol	0	4	0.415	---	---	0
660	pizotifen	0	4	-0.415	---	---	0
661	noscapine	0	4	-0.415	---	---	0
662	probenecid	0.209	4	0.415	---	---	25
663	raubasine	-0.167	4	-0.415	---	---	25
664	PNU-0293363	0	3	-0.415	---	---	0
665	(-)-isoprenaline	0	4	-0.415	---	---	0
666	nialamide	0	4	0.415	---	---	0
667	hesperidin	0.231	4	0.414	---	---	25
668	deptropine	0	4	0.414	---	---	0
669	alfaxalone	-0.271	3	0.414	---	---	0
670	digoxin	-0.185	4	0.414	---	---	0
671	sulfaguanidine	0	5	-0.414	---	---	0
672	propylthiouracil	0	4	0.414	---	---	0
673	leflunomide	-0.156	4	-0.413	---	---	25
674	raloxifene	0	7	-0.413	---	---	0
675	clorsulon	0.201	4	-0.413	---	---	0
676	rifampicin	0	4	-0.412	---	---	0
677	fluocinonide	0	5	0.412	---	---	0
678	fusidic acid	-0.174	4	-0.412	---	---	25
679	famprofazone	0	6	0.411	---	---	0
680	amylocaine	0	5	-0.411	---	---	0
681	mepacrine	0	2	-0.41	---	---	0
682	AH-23848	0	3	0.41	---	---	0
683	butein	0	2	-0.41	---	---	0
684	epirizole	0	5	0.41	---	---	0
685	0225151-0000	-0.243	3	-0.409	---	---	33
686	astemizole	0	5	0.409	---	---	0
687	niridazole	0	4	0.409	---	---	0
688	amphotericin B	0	4	-0.409	---	---	0
689	dicloxacillin	0.179	4	0.409	---	---	25
690	scopolamine	0.228	4	0.409	---	---	25
691	troglitazone	-0.079	16	-0.408	---	---	12
692	famotidine	0.135	5	0.408	---	---	40
693	troleandomycin	0	4	0.407	---	---	0
694	naltrexone	0.33	5	0.407	---	---	40
695	Prestwick-981	0.271	3	0.407	---	---	33
696	sitosterol	0	4	0.406	---	---	0
697	amantadine	0.239	4	-0.406	---	---	0
698	tobramycin	0	4	0.406	---	---	0
699	flunisolide	0	6	0.405	---	---	0
700	butyl hydroxybenzoate	0.016	5	0.405	---	---	20
701	profenamine	-0.211	4	-0.405	---	---	25
702	debrisoquine	0	4	-0.405	---	---	0
703	chlormezanone	-0.206	4	-0.405	---	---	25
704	minocycline	0	5	-0.404	---	---	0
705	(+/-)-catechin	0	4	-0.404	---	---	0
706	fusaric acid	0	4	0.404	---	---	0
707	metixene	0.099	4	-0.404	---	---	25
708	hydrocortisone	0	3	0.404	---	---	0
709	tyloxapol	0	4	0.404	---	---	0
710	buspirone	0.174	4	0.404	---	---	25
711	benzethonium chloride	0	3	0.404	---	---	0
712	quinisocaine	0	4	0.403	---	---	0
713	CP-863187	0	4	-0.403	---	---	0
714	zimeldine	0	5	0.403	---	---	0
715	heliotrine	0	6	0.402	---	---	0
716	novobiocin	0.194	9	0.402	---	---	44
717	picrotoxinin	0	4	0.402	---	---	0
718	cefaclor	0.22	4	0.402	---	---	25
719	quinostatin	0	2	0.401	---	---	0
720	zardaverine	0	4	-0.401	---	---	0
721	citiolone	0	6	0.401	---	---	0
722	oxybuprocaine	-0.205	4	0.401	---	---	0
723	suprofen	0.199	4	0.4	---	---	25
724	carbarsone	0	4	0.4	---	---	0
725	fenoprofen	0	6	0.4	---	---	0
726	sulfacetamide	0.197	4	0.399	---	---	25
727	tenoxicam	0	4	-0.398	---	---	0
728	bacitracin	0	3	-0.397	---	---	0
729	selegiline	0	4	0.397	---	---	0
730	aminohippuric acid	0	4	0.397	---	---	0
731	clorgiline	0	4	0.396	---	---	0
732	zuclopenthixol	0	4	-0.396	---	---	0
733	clenbuterol	-0.143	5	-0.396	---	---	20
734	PHA-00767505E	0.214	4	-0.396	---	---	0
735	dihydroergotamine	-0.186	5	-0.395	---	---	20
736	bezafibrate	0	4	0.395	---	---	0
737	Trolox C	0.205	4	0.394	---	---	25
738	phenindione	-0.19	4	0.394	---	---	0
739	rolipram	0.195	4	0.394	---	---	25
740	wortmannin	-0.038	18	-0.393	---	---	5
741	sotalol	-0.193	4	-0.393	---	---	25
742	parthenolide	0	4	-0.393	---	---	0
743	beta-escin	0	6	0.393	---	---	0
744	hemicholinium	0	4	-0.393	---	---	0
745	tacrolimus	0.215	3	-0.393	---	---	0
746	nicergoline	0	5	0.392	---	---	0
747	metergoline	-0.22	4	-0.392	---	---	25
748	amiodarone	-0.169	5	0.392	---	---	0
749	clopamide	0	4	-0.392	---	---	0
750	enalapril	0	4	-0.392	---	---	0
751	cinchocaine	0	5	0.392	---	---	0
752	santonin	0.194	4	0.392	---	---	25
753	ciprofibrate	0	4	-0.391	---	---	0
754	fluorometholone	0	4	0.391	---	---	0
755	tiabendazole	-0.184	4	0.391	---	---	0
756	fursultiamine	-0.187	4	-0.391	---	---	25
757	proxymetacaine	0	4	0.391	---	---	0
758	oxytetracycline	0	3	0.391	---	---	0
759	flutamide	-0.314	5	-0.391	---	---	40
760	nilutamide	0	4	-0.39	---	---	0
761	tetraethylenepentamine	-0.125	6	-0.39	---	---	16
762	hecogenin	0.201	4	0.389	---	---	25
763	propidium iodide	0	4	-0.389	---	---	0
764	khellin	0.149	5	-0.388	---	---	0
765	lactobionic acid	0	4	-0.388	---	---	0
766	dydrogesterone	-0.204	4	-0.387	---	---	25
767	piperacetazine	0	4	-0.387	---	---	0
768	dioxybenzone	0	4	0.387	---	---	0
769	etofylline	0	5	0.387	---	---	0
770	meglumine	0.192	4	0.386	---	---	25
771	levcycloserine	-0.17	4	-0.386	---	---	25
772	oxybutynin	0	4	0.386	---	---	0
773	pipenzolate bromide	0	4	0.386	---	---	0
774	glycopyrronium bromide	-0.187	5	-0.385	---	---	20
775	propofol	0	4	0.385	---	---	0
776	ricinine	0.163	4	0.385	---	---	25
777	corynanthine	0	3	0.384	---	---	0
778	dinoprostone	0	4	-0.384	---	---	0
779	sulfinpyrazone	0	4	0.383	---	---	0
780	bendroflumethiazide	0	6	0.382	---	---	0
781	lobeline	0.192	4	0.382	---	---	25
782	tremorine	0.181	4	0.382	---	---	25
783	diphenylpyraline	0	6	-0.382	---	---	0
784	nadide	-0.219	4	-0.382	---	---	25
785	atovaquone	0	3	0.381	---	---	0
786	ionomycin	0	3	-0.38	---	---	0
787	meclofenamic acid	0.153	5	-0.38	---	---	0
788	sulfapyridine	-0.073	4	-0.38	---	---	25
789	AG-012559	0	3	0.379	---	---	0
790	paroxetine	0	4	-0.379	---	---	0
791	demeclocycline	0	6	0.378	---	---	0
792	anabasine	-0.292	3	-0.378	---	---	33
793	tetramisole	0	4	0.378	---	---	0
794	sulfadiazine	0	5	-0.378	---	---	0
795	flupentixol	-0.173	4	0.378	---	---	0
796	gibberellic acid	0	4	-0.378	---	---	0
797	oxantel	-0.151	4	-0.378	---	---	25
798	bupivacaine	-0.178	4	-0.377	---	---	25
799	alclometasone	0	4	-0.377	---	---	0
800	nimesulide	0	4	0.377	---	---	0
801	sulfafurazole	0	5	0.377	---	---	0
802	fludroxycortide	0.147	5	0.376	---	---	20
803	15(S)-15-methylprostaglandin E2	-0.167	4	-0.376	---	---	25
804	cisapride	0	4	0.376	---	---	0
805	desoxycortone	0	4	0.375	---	---	0
806	MG-262	-0.283	3	-0.375	---	---	33
807	ciclosporin	0	6	-0.375	---	---	0
808	androsterone	0	4	0.375	---	---	0
809	fluorocurarine	-0.174	4	-0.374	---	---	25
810	pyrantel	0	5	0.373	---	---	0
811	galantamine	0	4	0.373	---	---	0
812	Prestwick-685	0	5	0.373	---	---	0
813	flucytosine	0.2	4	0.372	---	---	25
814	pimethixene	0	3	-0.372	---	---	0
815	diethylcarbamazine	0	4	0.371	---	---	0
816	clemizole	0	5	0.371	---	---	0
817	benzydamine	0	4	-0.371	---	---	0
818	meclocycline	0	4	-0.37	---	---	0
819	cotinine	0.129	6	0.37	---	---	16
820	colchicine	-0.128	6	-0.37	---	---	16
821	2,6-dimethylpiperidine	0.148	5	0.37	---	---	20
822	nitrofurantoin	0	5	0.369	---	---	0
823	fenspiride	-0.333	5	-0.369	---	---	40
824	delsoline	0	4	0.369	---	---	0
825	orphenadrine	-0.221	6	-0.369	---	---	33
826	idazoxan	0.175	4	0.369	---	---	25
827	moroxydine	0	5	-0.367	---	---	0
828	pergolide	0	4	-0.367	---	---	0
829	isoconazole	0	5	0.367	---	---	0
830	homochlorcyclizine	0	4	-0.367	---	---	0
831	triamcinolone	0.162	5	0.366	---	---	20
832	solanine	-0.177	4	0.366	---	---	0
833	brompheniramine	0	4	-0.366	---	---	0
834	carbenoxolone	0.171	4	-0.366	---	---	0
835	papaverine	0	4	0.365	---	---	0
836	betazole	0.003	5	-0.365	---	---	20
837	cefoxitin	0	4	-0.365	---	---	0
838	cinchonine	0.208	4	-0.365	---	---	0
839	palmatine	0	4	0.365	---	---	0
840	SC-560	0.245	3	-0.364	---	---	0
841	gemfibrozil	-0.162	5	-0.363	---	---	20
842	calcium pantothenate	0	4	0.363	---	---	0
843	cefotaxime	0	5	-0.363	---	---	0
844	amiloride	-0.014	5	0.362	---	---	20
845	tinidazole	-0.125	6	-0.362	---	---	16
846	mefexamide	0	4	-0.362	---	---	0
847	flunixin	-0.169	5	0.362	---	---	0
848	betonicine	0.262	6	0.361	---	---	33
849	chlorprothixene	0	4	0.36	---	---	0
850	ketoprofen	0.108	6	0.36	---	---	16
851	telenzepine	0	4	0.36	---	---	0
852	PHA-00851261E	0.188	8	0.36	---	---	25
853	corbadrine	0	4	0.36	---	---	0
854	nefopam	0.148	5	-0.359	---	---	0
855	iobenguane	0	4	-0.359	---	---	0
856	dicoumarol	-0.104	6	-0.358	---	---	16
857	neostigmine bromide	0	4	-0.358	---	---	0
858	PNU-0251126	-0.151	6	-0.358	---	---	33
859	acetohexamide	0.214	4	0.358	---	---	25
860	adipiodone	0	4	0.358	---	---	0
861	biotin	0	3	0.357	---	---	0
862	rifabutin	0	3	0.357	---	---	0
863	mepenzolate bromide	0	5	0.357	---	---	0
864	allantoin	0.176	5	0.356	---	---	20
865	acetylsalicylsalicylic acid	-0.216	4	0.356	---	---	0
866	ciclacillin	0	4	-0.356	---	---	0
867	benzylpenicillin	0	4	0.356	---	---	0
868	quercetin	-0.139	6	-0.355	---	---	16
869	NS-398	0	3	-0.355	---	---	0
870	rilmenidine	0.22	4	-0.355	---	---	0
871	sulfachlorpyridazine	0	5	-0.355	---	---	0
872	dl-alpha tocopherol	0	4	0.354	---	---	0
873	spaglumic acid	0	2	0.354	---	---	0
874	fenbendazole	0.185	4	0.354	---	---	25
875	diprophylline	-0.002	5	-0.354	---	---	20
876	5253409	0	2	-0.353	---	---	0
877	glibenclamide	0	4	0.353	---	---	0
878	monocrotaline	0	4	0.352	---	---	0
879	imipramine	0	4	0.352	---	---	0
880	cyclopentolate	0	4	0.352	---	---	0
881	CP-319743	0	4	-0.352	---	---	0
882	PHA-00846566E	0	3	-0.351	---	---	0
883	saquinavir	0	4	0.351	---	---	0
884	hyoscyamine	0	5	0.351	---	---	0
885	propranolol	0	4	-0.35	---	---	0
886	nicotinic acid	-0.148	4	-0.35	---	---	25
887	ticlopidine	0	5	0.349	---	---	0
888	PF-00539745-00	0.267	3	0.349	---	---	33
889	kanamycin	0	4	-0.349	---	---	0
890	carbinoxamine	0	4	0.348	---	---	0
891	cimetidine	-0.091	5	-0.347	---	---	20
892	midodrine	0.311	5	0.347	---	---	40
893	prilocaine	0.141	6	0.347	---	---	16
894	colecalciferol	-0.2	4	0.346	---	---	0
895	mevalolactone	0	3	-0.346	---	---	0
896	pinacidil	0	4	-0.345	---	---	0
897	methanthelinium bromide	0	4	-0.345	---	---	0
898	cefazolin	0	5	-0.345	---	---	0
899	clofilium tosylate	0	3	-0.345	---	---	0
900	metolazone	0.161	5	0.345	---	---	20
901	guanfacine	0	5	0.344	---	---	0
902	yohimbine	0	5	-0.344	---	---	0
903	fluvastatin	0	4	0.344	---	---	0
904	bromopride	0.112	6	0.343	---	---	16
905	thioproperazine	0.147	5	0.343	---	---	20
906	tolfenamic acid	-0.234	4	-0.343	---	---	25
907	naringin	0	4	0.343	---	---	0
908	ozagrel	0	4	0.343	---	---	0
909	dilazep	0	5	0.342	---	---	0
910	Prestwick-1085	0	4	0.342	---	---	0
911	chlortetracycline	0.148	5	0.342	---	---	20
912	0173570-0000	0.13	6	0.342	---	---	16
913	cyclizine	0	4	0.342	---	---	0
914	dyclonine	0	4	-0.342	---	---	0
915	propantheline bromide	-0.18	4	-0.341	---	---	25
916	alpha-estradiol	0	16	0.341	---	---	0
917	mephenesin	0	5	0.341	---	---	0
918	ceftazidime	0	3	0.341	---	---	0
919	josamycin	0.276	5	0.339	---	---	40
920	convolamine	0	4	-0.339	---	---	0
921	flufenamic acid	-0.086	6	0.339	---	---	0
922	xylazine	0	4	0.339	---	---	0
923	diperodon	0.266	3	0.339	---	---	33
924	PF-01378883-00	0	4	0.339	---	---	0
925	salsolidin	0	4	0.338	---	---	0
926	cefmetazole	0	4	0.338	---	---	0
927	lidoflazine	0.212	3	0.337	---	---	33
928	lumicolchicine	0	3	-0.337	---	---	0
929	cefixime	0	4	-0.337	---	---	0
930	isocarboxazid	0.313	5	0.337	---	---	40
931	praziquantel	-0.057	4	-0.337	---	---	25
932	diloxanide	0.217	4	-0.337	---	---	0
933	CAY-10397	0	3	-0.336	---	---	0
934	syrosingopine	0	4	0.336	---	---	0
935	naphazoline	0	5	-0.335	---	---	0
936	bethanechol	0	4	-0.335	---	---	0
937	fenbufen	0	6	0.335	---	---	0
938	griseofulvin	0.167	5	0.334	---	---	20
939	guanabenz	0.149	5	-0.334	---	---	0
940	tetrahydroalstonine	0.181	4	-0.334	---	---	0
941	solasodine	-0.112	6	0.334	---	---	0
942	minaprine	0.157	5	0.334	---	---	20
943	celecoxib	0.243	5	0.333	---	---	40
944	ascorbic acid	0.183	4	0.333	---	---	25
945	cloperastine	-0.158	6	0.333	---	---	0
946	fluticasone	0	4	-0.332	---	---	0
947	isoetarine	0	4	0.332	---	---	0
948	sertaconazole	0	4	0.332	---	---	0
949	BCB000038	0.23	4	0.331	---	---	25
950	sulpiride	0	5	0.331	---	---	0
951	clindamycin	0	5	-0.331	---	---	0
952	piperacillin	0	5	-0.331	---	---	0
953	cinnarizine	0.204	4	0.331	---	---	25
954	mebendazole	-0.155	5	0.33	---	---	0
955	benserazide	0	5	-0.33	---	---	0
956	acenocoumarol	0.185	5	-0.329	---	---	0
957	phenformin	-0.072	7	-0.329	---	---	14
958	zalcitabine	0	4	-0.328	---	---	0
959	PF-00562151-00	0	8	-0.328	---	---	0
960	dropropizine	0	4	-0.328	---	---	0
961	isradipine	0	4	0.327	---	---	0
962	tiratricol	0	4	-0.327	---	---	0
963	cefalonium	0	3	0.327	---	---	0
964	colforsin	0.189	5	0.327	---	---	20
965	proguanil	0	3	-0.326	---	---	0
966	etamivan	-0.182	4	0.325	---	---	0
967	oxybenzone	0.174	4	-0.325	---	---	0
968	0316684-0000	0.232	4	-0.324	---	---	0
969	caffeic acid	-0.29	3	-0.324	---	---	33
970	PNU-0230031	0	8	-0.324	---	---	0
971	cefalotin	0	4	0.323	---	---	0
972	pentetic acid	0.177	5	0.323	---	---	20
973	danazol	0.195	4	0.323	---	---	25
974	ergocalciferol	0	4	-0.323	---	---	0
975	domperidone	0	4	-0.323	---	---	0
976	ranitidine	-0.157	5	0.322	---	---	0
977	pilocarpine	0.198	4	-0.322	---	---	0
978	butamben	0	4	-0.322	---	---	0
979	hexamethonium bromide	0	5	0.321	---	---	0
980	dimethadione	0	4	0.321	---	---	0
981	vorinostat	0.126	12	0.321	---	---	25
982	paromomycin	-0.02	4	-0.321	---	---	25
983	vinpocetine	0	4	0.32	---	---	0
984	5211181	0	2	-0.319	---	---	0
985	probucol	0.112	6	0.319	---	---	16
986	moxisylyte	0	5	0.319	---	---	0
987	oxolinic acid	0	5	0.319	---	---	0
988	cefapirin	0.225	4	0.319	---	---	25
989	kinetin	0	4	0.319	---	---	0
990	tetryzoline	0	3	0.319	---	---	0
991	aztreonam	0	5	-0.318	---	---	0
992	buflomedil	0	4	0.317	---	---	0
993	sulfathiazole	-0.007	5	0.317	---	---	20
994	chloropyramine	0	4	0.317	---	---	0
995	erastin	0	4	0.316	---	---	0
996	semustine	0.166	4	0.316	---	---	25
997	SR-95531	0.226	4	0.316	---	---	25
998	oxedrine	0	4	0.315	---	---	0
999	cefadroxil	0	4	-0.315	---	---	0
1000	sulfanilamide	0	4	0.315	---	---	0
1001	Prestwick-664	-0.114	6	0.315	---	---	0
1002	deferoxamine	-0.098	8	-0.315	---	---	12
1003	bicuculline	0	4	0.315	---	---	0
1004	glimepiride	0	4	-0.315	---	---	0
1005	digoxigenin	0	5	-0.315	---	---	0
1006	karakoline	0.117	6	-0.315	---	---	0
1007	etanidazole	-0.195	4	0.314	---	---	0
1008	betamethasone	0	3	-0.314	---	---	0
1009	benperidol	0	4	0.313	---	---	0
1010	atropine methonitrate	0	3	0.313	---	---	0
1011	harman	0	4	-0.312	---	---	0
1012	azacyclonol	-0.001	5	-0.312	---	---	20
1013	tropicamide	0	6	0.312	---	---	0
1014	yohimbic acid	0.278	3	-0.312	---	---	0
1015	STOCK1N-28457	0	3	-0.312	---	---	0
1016	bemegride	0	4	-0.311	---	---	0
1017	mesalazine	0.155	5	0.311	---	---	20
1018	0179445-0000	0	8	0.311	---	---	0
1019	hydrochlorothiazide	0.153	5	-0.311	---	---	0
1020	flecainide	-0.145	6	-0.311	---	---	16
1021	tomatidine	-0.181	4	0.31	---	---	0
1022	chloramphenicol	-0.208	4	0.309	---	---	0
1023	neomycin	0	5	0.308	---	---	0
1024	tolazoline	0.001	5	-0.308	---	---	20
1025	dirithromycin	0	3	0.308	---	---	0
1026	amrinone	0	4	-0.308	---	---	0
1027	nifuroxazide	0.04	4	0.307	---	---	25
1028	serotonin	0	5	-0.307	---	---	0
1029	flucloxacillin	0	4	-0.307	---	---	0
1030	methapyrilene	0	4	0.307	---	---	0
1031	edrophonium chloride	0	5	0.307	---	---	0
1032	orlistat	0	5	0.307	---	---	0
1033	labetalol	0	4	0.306	---	---	0
1034	captopril	0.15	5	0.306	---	---	20
1035	molsidomine	-0.212	4	-0.306	---	---	25
1036	theobromine	0	4	0.306	---	---	0
1037	nifedipine	0.089	7	0.306	---	---	14
1038	tridihexethyl	0	4	0.305	---	---	0
1039	ramipril	-0.186	4	-0.305	---	---	25
1040	digitoxigenin	0	4	0.304	---	---	0
1041	alfadolone	0.266	3	0.304	---	---	33
1042	4-hydroxyphenazone	-0.011	5	-0.304	---	---	20
1043	equilin	0.164	5	0.304	---	---	20
1044	suxibuzone	0	4	-0.303	---	---	0
1045	pipemidic acid	0	3	-0.303	---	---	0
1046	nifenazone	0.017	5	-0.302	---	---	20
1047	mebeverine	0.203	4	0.302	---	---	25
1048	rofecoxib	0	6	0.302	---	---	0
1049	15-delta prostaglandin J2	-0.05	15	-0.301	---	---	6
1050	sulfamerazine	-0.139	5	-0.301	---	---	20
1051	tiapride	-0.131	5	-0.301	---	---	20
1052	nocodazole	0.166	6	0.301	---	---	16
1053	miconazole	-0.006	5	0.301	---	---	20
1054	trimethadione	0.205	4	-0.301	---	---	0
1055	trichlormethiazide	0	4	0.301	---	---	0
1056	diflorasone	0	4	-0.3	---	---	0
1057	dihydrostreptomycin	0	5	-0.299	---	---	0
1058	enilconazole	-0.163	4	-0.298	---	---	25
1059	isoxsuprine	-0.152	5	-0.298	---	---	20
1060	indapamide	0.148	6	0.297	---	---	33
1061	pirenzepine	0	5	-0.297	---	---	0
1062	conessine	0	4	0.297	---	---	0
1063	beclometasone	0	3	0.296	---	---	0
1064	pioglitazone	0.02	11	-0.296	---	---	9
1065	octopamine	-0.159	4	-0.296	---	---	25
1066	verapamil	0.268	6	0.296	---	---	33
1067	phenelzine	0	6	-0.296	---	---	0
1068	Prestwick-689	0.018	4	0.295	---	---	25
1069	STOCK1N-35215	-0.241	3	-0.295	---	---	33
1070	metoclopramide	0	6	-0.295	---	---	0
1071	alpha-ergocryptine	-0.153	6	-0.295	---	---	16
1072	todralazine	0	5	0.295	---	---	0
1073	3-hydroxy-DL-kynurenine	0	6	-0.295	---	---	0
1074	parbendazole	0	4	0.294	---	---	0
1075	alfuzosin	0	5	0.294	---	---	0
1076	dienestrol	0	3	0.294	---	---	0
1077	megestrol	0.223	4	0.294	---	---	25
1078	mycophenolic acid	0	3	0.294	---	---	0
1079	epivincamine	-0.205	4	-0.293	---	---	25
1080	xylometazoline	0	4	0.293	---	---	0
1081	clotrimazole	-0.152	5	0.293	---	---	0
1082	perphenazine	-0.022	5	-0.292	---	---	20
1083	prasterone	0.154	4	0.292	---	---	25
1084	dizocilpine	0	5	0.292	---	---	0
1085	ethoxyquin	0	5	0.292	---	---	0
1086	scoulerine	0.176	4	0.292	---	---	25
1087	meropenem	-0.231	4	0.291	---	---	0
1088	moracizine	0	4	0.29	---	---	0
1089	ketanserin	-0.191	4	0.29	---	---	0
1090	atropine	-0.163	4	0.289	---	---	0
1091	prednisolone	-0.165	5	-0.288	---	---	20
1092	harmol	0.207	4	0.288	---	---	25
1093	mephentermine	0	5	0.287	---	---	0
1094	oxamniquine	0	4	-0.287	---	---	0
1095	cefotetan	0	3	-0.287	---	---	0
1096	arachidonic acid	0.054	3	-0.286	---	---	33
1097	trimethoprim	0.005	5	0.286	---	---	20
1098	pregnenolone	0.229	4	-0.286	---	---	0
1099	myosmine	0.263	6	0.286	---	---	33
1100	practolol	0	4	0.285	---	---	0
1101	N-acetyl-L-aspartic acid	0	4	-0.285	---	---	0
1102	hydralazine	0	6	0.285	---	---	0
1103	primaquine	0	4	0.284	---	---	0
1104	doxylamine	-0.001	5	-0.284	---	---	20
1105	trimethylcolchicinic acid	0	4	0.283	---	---	0
1106	nystatin	0.238	3	0.282	---	---	33
1107	lanatoside C	0	6	0.282	---	---	0
1108	velnacrine	0	4	0.281	---	---	0
1109	tamoxifen	0	7	0.281	---	---	0
1110	corticosterone	0	4	-0.28	---	---	0
1111	hydroquinine	0.182	4	-0.28	---	---	0
1112	securinine	-0.201	4	-0.279	---	---	25
1113	methoxsalen	0	3	0.279	---	---	0
1114	ciprofloxacin	0.126	5	-0.278	---	---	0
1115	0198306-0000	0.215	4	0.278	---	---	25
1116	acebutolol	0.001	5	-0.277	---	---	20
1117	sulfamethoxazole	-0.166	5	-0.277	---	---	20
1118	diphemanil metilsulfate	0.161	5	-0.277	---	---	0
1119	mafenide	0.135	5	-0.277	---	---	0
1120	baclofen	0.152	5	0.276	---	---	20
1121	vitexin	0	4	0.275	---	---	0
1122	picotamide	-0.183	5	-0.275	---	---	20
1123	azathioprine	0	7	-0.275	---	---	0
1124	indometacin	0	8	-0.274	---	---	0
1125	netilmicin	0	4	-0.274	---	---	0
1126	PF-00875133-00	0.215	3	0.273	---	---	33
1127	strophanthidin	0.181	4	0.273	---	---	25
1128	helveticoside	0	6	0.273	---	---	0
1129	procarbazine	0	3	-0.273	---	---	0
1130	idoxuridine	0	5	-0.273	---	---	0
1131	bufexamac	-0.219	4	0.272	---	---	0
1132	pepstatin	0	4	-0.272	---	---	0
1133	prochlorperazine	0.06	16	0.27	---	---	12
1134	S-propranolol	0	4	0.269	---	---	0
1135	meprylcaine	0	4	-0.269	---	---	0
1136	hydrastinine	0	5	-0.269	---	---	0
1137	loperamide	-0.037	6	0.269	---	---	16
1138	ifosfamide	0.196	3	0.268	---	---	33
1139	triamterene	0	5	-0.268	---	---	0
1140	LM-1685	0	3	0.268	---	---	0
1141	(-)-atenolol	-0.158	4	-0.267	---	---	25
1142	spiradoline	0	4	-0.267	---	---	0
1143	oxaprozin	0	6	-0.267	---	---	0
1144	hexylcaine	0	4	-0.267	---	---	0
1145	midecamycin	0.184	5	0.266	---	---	20
1146	salbutamol	-0.172	5	0.266	---	---	0
1147	sulfadimidine	0	6	0.266	---	---	0
1148	citalopram	0.186	4	-0.265	---	---	0
1149	erythromycin	0.156	5	-0.265	---	---	0
1150	SC-58125	0.101	4	0.265	---	---	25
1151	3-acetylcoumarin	-0.137	5	0.264	---	---	0
1152	dipivefrine	0	4	-0.264	---	---	0
1153	tretinoin	-0.062	22	0.263	---	---	0
1154	droperidol	0	4	-0.263	---	---	0
1155	C-75	0	4	0.262	---	---	0
1156	phenazopyridine	0	4	-0.262	---	---	0
1157	tanespimycin	0.07	62	0.262	---	---	9
1158	phenylpropanolamine	-0.021	4	0.262	---	---	25
1159	methyldopa	0	5	0.26	---	---	0
1160	5707885	0.154	4	0.26	---	---	25
1161	ticarcillin	0	3	0.26	---	---	0
1162	sisomicin	0	4	-0.26	---	---	0
1163	epitiostanol	0	4	-0.26	---	---	0
1164	cyclopenthiazide	0	4	-0.26	---	---	0
1165	terguride	0	8	-0.26	---	---	0
1166	dorzolamide	-0.186	4	-0.26	---	---	25
1167	metitepine	0.198	4	0.259	---	---	25
1168	naftifine	0.214	4	-0.259	---	---	0
1169	pirinixic acid	0.127	5	-0.258	---	---	0
1170	ampicillin	0.176	4	0.258	---	---	25
1171	clozapine	-0.002	17	-0.258	---	---	5
1172	0317956-0000	0.201	8	-0.257	---	---	0
1173	cefuroxime	0	4	0.257	---	---	0
1174	altizide	-0.044	4	0.256	---	---	25
1175	enoxacin	0	4	-0.256	---	---	0
1176	nafcillin	0	4	0.255	---	---	0
1177	carcinine	-0.221	4	0.254	---	---	0
1178	chlorphenamine	0	4	-0.254	---	---	0
1179	BAS-012416453	0	3	0.254	---	---	0
1180	etynodiol	0.232	4	0.254	---	---	25
1181	dehydrocholic acid	0	5	-0.253	---	---	0
1182	riluzole	0.18	5	0.253	---	---	20
1183	nalidixic acid	0	5	0.253	---	---	0
1184	bretylium tosilate	0.212	4	-0.253	---	---	0
1185	butacaine	0.19	4	0.252	---	---	25
1186	cefsulodin	0	4	0.252	---	---	0
1187	alvespimycin	0	12	0.252	---	---	0
1188	adenosine phosphate	0.196	4	0.251	---	---	25
1189	laudanosine	0	4	0.251	---	---	0
1190	atropine oxide	-0.192	5	-0.25	---	---	20
1191	diclofenamide	0	4	-0.25	---	---	0
1192	naftidrofuryl	0	4	-0.25	---	---	0
1193	ioxaglic acid	0	3	0.25	---	---	0
1194	mefenamic acid	0	5	-0.25	---	---	0
1195	phensuximide	0	4	-0.25	---	---	0
1196	sparteine	0.247	4	0.25	---	---	25
1197	chlorpropamide	0	6	-0.249	---	---	0
1198	ethotoin	-0.147	6	0.249	---	---	0
1199	nitrendipine	0	5	0.249	---	---	0
1200	L-methionine sulfoximine	0	4	-0.249	---	---	0
1201	Prestwick-1100	0	4	-0.249	---	---	0
1202	spectinomycin	-0.238	4	-0.249	---	---	25
1203	tolbutamide	0	7	0.248	---	---	0
1204	puromycin	0.191	4	-0.248	---	---	0
1205	pivmecillinam	0.053	4	0.248	---	---	25
1206	tacrine	0	4	-0.248	---	---	0
1207	clebopride	0.237	4	0.248	---	---	25
1208	oxymetazoline	0.191	4	0.247	---	---	25
1209	acacetin	0	6	-0.247	---	---	0
1210	pralidoxime	0	4	-0.246	---	---	0
1211	cicloheximide	0.214	4	-0.246	---	---	0
1212	ursolic acid	0	4	-0.244	---	---	0
1213	estradiol	0.038	37	-0.243	---	---	2
1214	hydroxyzine	0	5	0.243	---	---	0
1215	spironolactone	0	5	-0.242	---	---	0
1216	diclofenac	0.025	5	0.242	---	---	20
1217	molindone	0	4	-0.242	---	---	0
1218	rescinnamine	0	3	0.241	---	---	0
1219	R-atenolol	0	4	-0.24	---	---	0
1220	dosulepin	0	4	-0.24	---	---	0
1221	lysergol	-0.216	4	-0.24	---	---	25
1222	prazosin	-0.141	6	-0.24	---	---	16
1223	thioridazine	0.057	20	0.239	---	---	20
1224	hydrastine hydrochloride	-0.215	4	-0.239	---	---	25
1225	(-)-MK-801	-0.213	4	-0.238	---	---	25
1226	trifluoperazine	0	16	0.238	---	---	0
1227	F0447-0125	-0.213	4	-0.238	---	---	25
1228	alprostadil	0.23	7	0.237	---	---	28
1229	fluphenazine	-0.041	18	-0.237	---	---	5
1230	urapidil	-0.212	4	-0.237	---	---	25
1231	carisoprodol	0	4	-0.236	---	---	0
1232	coralyne	0	4	0.236	---	---	0
1233	levothyroxine sodium	0.217	4	0.236	---	---	25
1234	carbamazepine	0	8	0.235	---	---	0
1235	flumequine	0.216	4	0.235	---	---	25
1236	bupropion	-0.2	4	0.234	---	---	0
1237	6-benzylaminopurine	0	5	0.234	---	---	0
1238	mestranol	0	4	0.234	---	---	0
1239	metformin	0.127	10	0.234	---	---	30
1240	cinoxacin	-0.208	4	-0.234	---	---	25
1241	fosfosal	0	4	-0.233	---	---	0
1242	metrizamide	0.21	4	0.23	---	---	25
1243	vanoxerine	0.189	4	0.229	---	---	25
1244	estropipate	0	4	0.229	---	---	0
1245	diflunisal	0.139	5	-0.229	---	---	0
1246	nicardipine	0	4	-0.229	---	---	0
1247	aminoglutethimide	0	3	0.228	---	---	0
1248	dexibuprofen	0	4	-0.228	---	---	0
1249	trimipramine	0	4	-0.226	---	---	0
1250	boldine	0	4	-0.226	---	---	0
1251	guaifenesin	-0.142	6	-0.225	---	---	16
1252	harmaline	-0.196	4	-0.225	---	---	25
1253	piretanide	0.204	4	0.224	---	---	25
1254	diazoxide	0.192	5	-0.224	---	---	0
1255	benfluorex	0.203	4	0.223	---	---	25
1256	flumetasone	-0.108	6	0.223	---	---	0
1257	cinchonidine	0	4	-0.221	---	---	0
1258	sulfasalazine	0	5	0.221	---	---	0
1259	Prestwick-1080	0	4	0.22	---	---	0
1260	acetylsalicylic acid	0.003	13	0.22	---	---	7
1261	hydroxyachillin	0	4	-0.219	---	---	0
1262	foliosidine	0.107	6	0.219	---	---	16
1263	resveratrol	-0.086	9	0.219	---	---	0
1264	pentetrazol	-0.187	4	-0.217	---	---	25
1265	lomefloxacin	0	6	-0.217	---	---	0
1266	levodopa	0	5	-0.216	---	---	0
1267	bambuterol	0.195	4	0.215	---	---	25
1268	eldeline	-0.14	6	0.215	---	---	0
1269	tolmetin	0	4	-0.215	---	---	0
1270	testosterone	-0.165	5	-0.213	---	---	20
1271	pentamidine	-0.114	5	0.213	---	---	0
1272	suloctidil	-0.182	4	-0.213	---	---	25
1273	kaempferol	0.187	4	0.212	---	---	25
1274	gossypol	0.108	6	0.212	---	---	16
1275	physostigmine	0	4	0.211	---	---	0
1276	florfenicol	-0.168	4	-0.21	---	---	25
1277	niclosamide	-0.137	5	-0.209	---	---	20
1278	sirolimus	0.041	44	0.205	---	---	9
1279	triprolidine	0	4	-0.204	---	---	0
1280	iopanoic acid	0	4	-0.204	---	---	0
1281	terbutaline	0	4	-0.203	---	---	0
1282	glipizide	0	5	-0.201	---	---	0
1283	benzonatate	-0.187	5	-0.198	---	---	20
1284	methotrexate	0	8	0.196	---	---	0
1285	sulfabenzamide	0	4	0.195	---	---	0
1286	pentolonium	-0.179	5	-0.194	---	---	20
1287	letrozole	0	4	0.194	---	---	0
1288	retrorsine	0	4	0.193	---	---	0
1289	asiaticoside	0	4	-0.192	---	---	0
1290	hydroflumethiazide	0	5	0.19	---	---	0
1291	dobutamine	0	4	-0.189	---	---	0
1292	kawain	0	5	0.189	---	---	0
1293	trichostatin A	0.009	182	-0.186	---	---	7
1294	dexamethasone	0.195	8	0.186	---	---	25
1295	amikacin	0	4	0.183	---	---	0
1296	felodipine	-0.086	7	0.182	---	---	0
1297	metrifonate	-0.158	5	-0.176	---	---	20
1298	LY-294002	-0.075	61	-0.167	---	---	13
1299	rosiglitazone	0.134	14	0.165	---	---	14
1300	bucladesine	-0.022	6	-0.164	---	---	16
1301	estrone	0	4	-0.161	---	---	0
1302	haloperidol	0.043	32	-0.159	---	---	0
1303	seneciphylline	0	4	-0.159	---	---	0
1304	nordihydroguaiaretic acid	-0.057	15	-0.145	---	---	6
1305	benzamil	0.012	6	0.14	---	---	16
1306	valproic acid	-0.012	57	-0.117	---	---	5
1307	geldanamycin	-0.008	15	0.116	---	---	6
1308	monorden	0.032	22	0.11	---	---	4
1309	fulvestrant	0.023	40	-0.089	---	---	5

## Sheet: Table SIII
Table SIII. Results of enriched gene ontologies by differentially expressed genes.
Category	Term	Count	%	PValue	Genes	List Total	Pop Hits	Pop Total	Fold Enrichment	Bonferroni	Benjamini	FDR
GOTERM_BP_DIRECT	GO:0007062~sister chromatid cohesion	29	6.27706	2.57213e-22	ITGB3BP, RAD51C, KIF2C, SPC25, CDCA8, CENPA, BUB1, NUP37, SKA1, ZWILCH, CDCA5, NUDC, ERCC6L, KIF18A, NUF2, NUP85, SPDL1, NDC80, BIRC5, CDC20, CENPI, CENPH, MAD2L1, SGO2, PLK1, SGO1, KNL1, BUB1B, NUP107	397	103	16792	11.9089	3.88391e-19	3.88391e-19	4.27711e-19
GOTERM_BP_DIRECT	GO:0051301~cell division	46	9.95671	8.97075e-21	ITGB3BP, KIFC1, GNAI3, NEK2, PTTG1, RCC1, LATS2, FAM83D, SPC25, CDC42, KIF2C, CDCA8, NCAPH, NCAPG, OIP5, KATNA1, CDCA2, BUB1, NUP37, SKA1, ZWILCH, CDCA5, NUDC, TUBA1C, ERCC6L, RAN, CCNF, PSRC1, NUF2, TPX2, CDC23, NDC80, SPDL1, CDC20, BIRC5, KNSTRN, CDC25C, CCNB1, CCNB2, MAD2L1, SGO2, KNL1, SGO1, BUB1B, CENPW, MAD2L2	397	350	16792	5.55906	1.35458e-17	6.77291e-18	1.49172e-17
GOTERM_CC_DIRECT	GO:0005654~nucleoplasm	136	29.4372	1.02171e-19	ITGB3BP, RAD51C, PRC1, XRCC6, CDKN2AIPNL, PKMYT1, SYNCRIP, MCM10, PRIM1, KDM1A, CDCA8, OIP5, WDR77, PRIM2, DNAJC8, CDCA2, NUP37, RPL11, CDCA5, ORC1, ORC3, TIMMDC1, DFFA, RAN, MAGOH, NEIL3, TOPBP1, DEPDC1, MRTO4, RFC4, SGO2, SGO1, PSMA5, MAD2L2, KIF4A, HMGB2, LMNB1, BLM, CHEK1, RCC1, CSE1L, PSMB1, PSMB2, TAF9, POLQ, NUDC, ERCC6L, GINS1, ZMYM1, TRIP4, CSTF2, EME1, CDC23, CDC20, TKT, RAD54L, AK9, PP…	411	2784	18224	2.16607	3.72926e-17	3.72926e-17	1.40609e-16
GOTERM_BP_DIRECT	GO:0007067~mitotic nuclear division	36	7.79221	1.13186e-17	ITGB3BP, NEK2, PKMYT1, PTTG1, RCC1, LATS2, FAM83D, SPC25, KIF2C, OIP5, KATNA1, CDCA2, BUB1, NUP37, SKA1, ZWILCH, CDCA5, NUDC, ERCC6L, RAN, CCNF, KIF15, NUF2, TPX2, CDC23, NDC80, BIRC5, CDC20, CDC25C, CCNB2, KNL1, PLK1, SGO1, BUB1B, CENPW, MAD2L2	397	248	16792	6.13992	1.70912e-14	5.69705e-15	1.88215e-14
GOTERM_CC_DIRECT	GO:0000777~condensed chromosome kinetochore	22	4.7619	2.71022e-16	ITGB3BP, NEK2, NUF2, NUP85, NDC80, BIRC5, KNSTRN, CENPH, KIF2C, SPC25, MAD2L1, SGO2, SGO1, KNL1, HJURP, BUB1, CENPW, BUB1B, NUP37, NUP107, ZWILCH, ERCC6L	411	87	18224	11.2126	8.10463e-14	4.05231e-14	3.10862e-13
GOTERM_CC_DIRECT	GO:0005829~cytosol	136	29.4372	3.21912e-13	ITGB3BP, STIL, PRC1, CAPZA1, PGD, XRCC6, PKMYT1, PTTG1, TBC1D16, MAP3K7, CDCA8, SCLY, WDR77, NUP37, RPL11, CDCA5, ORC1, EIF2B5, FTL, YARS, DFFA, RAN, MAGOH, MAD2L1, AKR1B15, SGSM1, SGO2, SGO1, PSMA5, AKR1B10, ADSL, STMN1, SRXN1, ME1, KIF4A, TALDO1, SRM, NEK2, PPT1, CHEK1, PSMA8, CAPZB, FTH1, TK1, SPC25, CSE1L, PSMB1, RAC3, PSMB2, FBXO6, EIF3I, GALE, SKA1, NRDC, NUDC, EIF3M, ERCC6L, TRIP4, LGALS4,…	411	3315	18224	1.8191	1.17517e-10	3.91723e-11	4.4309e-10
GOTERM_MF_DIRECT	GO:0005515~protein binding	287	62.1212	4.66693e-13	ITGB3BP, RAD51C, HMGN2, TUBB2A, XRCC6, SYNCRIP, PTTG1, MAGEC1, MAGEC2, AUNIP, MAP3K7, CDCA8, NAA11, WDR77, NUP37, RPL11, CDCA5, EIF2B5, FTL, LYRM2, TIMMDC1, YARS, PRAME, RAN, DEPDC1, MIIP, TMEM132D, FAM86C1, RFC4, MAD2L1, SGO2, SGO1, SERBP1, KIAA1524, ZNF239, MAD2L2, CHORDC1, ZNHIT6, KIF4A, GNAI3, TALDO1, LMNB1, NEK2, MAGEA1, FAM122A, XK, CHEK1, PPT1, RCC1, MAGEA6, MAGEA3, TK1, RAC3, FBXO6, SKA1,…	414	8785	16881	1.3321	2.65107e-10	2.65107e-10	6.84164e-10
GOTERM_CC_DIRECT	GO:0000776~kinetochore	18	3.8961	2.39947e-12	NEK2, KIF18A, TTK, NUP85, NDC80, KNSTRN, CENPI, CENPH, KIF2C, MAD2L1, SGO1, PLK1, BUB1, BUB1B, CENPW, NUP37, NUP107, ZWILCH	411	81	18224	9.85347	8.75827e-10	2.18957e-10	3.30225e-09
GOTERM_CC_DIRECT	GO:0005634~nucleus	186	40.2597	1.93092e-11	ITGB3BP, KIFC1, RAD51C, HMX2, HMGN2, PRC1, TUBB2A, PRR11, XRCC6, PGD, SYNCRIP, PTTG1, MCM10, MAGEC2, MAP3K7, KDM1A, CDCA8, OIP5, NAA11, WDR77, NUP37, GNL2, ORC1, CDCA5, EIF2B5, ZNF43, YARS, PRAME, ZNF441, DFFA, RAN, MAGOH, NEIL3, UBIAD1, ZNF791, TOPBP1, DEPDC1, MRTO4, MAD2L1, SGO1, PSMA5, SERBP1, ZNF239, CELF4, MAD2L2, HMGB2, TALDO1, BLM, NEK2, MAGEA1, PPT1, STIP1, CHEK1, RCC1, PSMA8, FTH1, SPC25…	411	5415	18224	1.52306	7.04787e-09	1.40957e-09	2.65735e-08
GOTERM_CC_DIRECT	GO:0000922~spindle pole	19	4.11255	3.85319e-11	CEP85, CEP104, PRC1, NEK2, PSRC1, TPX2, SPDL1, TOPBP1, CDC20, KNSTRN, LATS2, AUNIP, CCNB1, MAD2L1, SGO1, PLK1, KATNA1, CKAP2L, GPSM2	411	109	18224	7.7291	1.40642e-08	2.34403e-09	5.3028e-08
GOTERM_CC_DIRECT	GO:0000775~chromosome, centromeric region	12	2.5974	4.76159e-08	KIF2C, CDCA8, SGO2, CENPA, HJURP, OIP5, SGO1, NUF2, CENPW, BIRC5, NDC80, CDCA5	411	57	18224	9.33487	1.73797e-05	2.48283e-06	6.55294e-05
GOTERM_BP_DIRECT	GO:0007059~chromosome segregation	13	2.81385	5.5448e-08	CEP85, NEK2, NUF2, NDC80, KNSTRN, RCC1, SPC25, SGO1, HJURP, OIP5, CDCA2, CENPW, SKA1	397	68	16792	8.08623	8.3723e-05	2.09314e-05	9.22029e-05
GOTERM_CC_DIRECT	GO:0005737~cytoplasm	167	36.1472	1.35695e-07	ITGB3BP, STIL, RAD51C, HMGN2, PRC1, TUBB2A, PITPNA, PRR11, XRCC6, TTK, PTTG1, TXLNA, MCM10, MAGEC2, AUNIP, MAP3K7, OIP5, WDR77, DNAJC8, CDCA2, RPL11, ORC1, CDCA5, EIF2B5, FTL, CEP85, YARS, DFFA, RAN, UBIAD1, LYPLA2, TOPBP1, MRTO4, SGSM1, SGO1, FAM72B, PSMA5, KIAA1524, SERBP1, CELF4, FAM72D, STMN1, MAD2L2, GPN2, HMGB2, KIF4A, GNAI3, TALDO1, BLM, NEK2, MAGEA1, RCC1, PSMA8, CAPZB, LIN28B, FTH1, PEF1…	411	5222	18224	1.41802	4.95274e-05	6.19106e-06	0.000186744
GOTERM_BP_DIRECT	GO:0007052~mitotic spindle organization	9	1.94805	3.3114e-07	CCNB1, STIL, SPC25, RAN, GPSM2, TTK, NDC80, STMN1, RCC1	397	30	16792	12.6892	0.000499897	9.99993e-05	0.000550642
GOTERM_CC_DIRECT	GO:0005813~centrosome	29	6.27706	4.50477e-07	DPF2, STIL, GNAI3, NEK2, CHEK1, AUNIP, CDC45, CTAG2, NCAPG, KATNA1, ERCC6L, CEP85, TCP1, KIF15, TOPBP1, CDC20, CCNB1, CCT5, PLK4, SASS6, CCNB2, CCT4, G6PD, HSPB11, PLK1, SGO1, WRAP73, CKAP2L, NUP107	411	426	18224	3.01849	0.000164411	1.82692e-05	0.000619949
GOTERM_BP_DIRECT	GO:0000082~G1/S transition of mitotic cell cycle	14	3.0303	8.02688e-07	PKMYT1, MCM2, MCM10, RCC1, LATS2, PRIM1, RPA2, MCM8, CDC45, RRM2, PRIM2, CDCA5, ORC1, ORC3	397	102	16792	5.8055	0.00121132	0.000201989	0.00133476
GOTERM_BP_DIRECT	GO:0000070~mitotic sister chromatid segregation	8	1.7316	1.28128e-06	KIFC1, MAD2L1, CENPA, PLK1, NEK2, NUSAP1, NDC80, KNSTRN	397	25	16792	13.5351	0.00193287	0.000276353	0.00213059
GOTERM_BP_DIRECT	GO:0007080~mitotic metaphase plate congression	9	1.94805	1.89037e-06	CCNB1, KIFC1, KIF2C, CDCA8, PSRC1, KIF18A, CDC23, SPDL1, CDCA5	397	37	16792	10.2885	0.0028504	0.000356745	0.0031434
GOTERM_BP_DIRECT	GO:0031145~anaphase-promoting complex-dependent catabolic process	12	2.5974	2.34238e-06	CCNB1, MAD2L1, PSMB1, PSMA5, PLK1, PSMB2, PSMD1, CDC23, BUB1B, CDC20, PTTG1, PSMA8	397	79	16792	6.4249	0.00353076	0.000392923	0.00389501
GOTERM_CC_DIRECT	GO:0005874~microtubule	23	4.97835	2.37184e-06	KIFC1, KIF4A, TCP1, NEK2, TUBB2A, KIF15, KIF18A, TPX2, NUSAP1, BIRC5, CCT7, KIF2C, CCT5, CCT4, KATNA1, MAP2, TUBD1, TUBAL3, TUBA3C, STMN1, TUBA1C, NUDC, KIF20A	411	311	18224	3.27921	0.000865346	8.65683e-05	0.00326409
GOTERM_CC_DIRECT	GO:0005819~spindle	14	3.0303	3.4056e-06	KIFC1, PRC1, KIF15, PSRC1, TPX2, NUSAP1, TTK, NUP85, CDC20, BIRC5, PLK1, KATNA1, MAD2L2, KIF20A	411	121	18224	5.13032	0.00124227	0.000112998	0.00468672
GOTERM_BP_DIRECT	GO:0006270~DNA replication initiation	8	1.7316	7.77976e-06	PRIM1, CDC45, PRIM2, TOPBP1, MCM2, MCM10, ORC1, ORC3	397	32	16792	10.5743	0.0116787	0.00117406	0.0129359
GOTERM_CC_DIRECT	GO:0005730~nucleolus	41	8.87446	1.07769e-05	HMGB2, BLM, NEK2, UTP18, XRCC6, UTP6, CDKN2AIPNL, MCM10, UTP11, TRAIP, LIN28B, EXOSC10, DDX27, CDCA8, HJURP, RPL11, GNL2, ORC1, HSPA8, GTF3C3, BCAS2, CEP85, IK, RAN, NOL9, EME1, NUSAP1, RPF2, ZCCHC17, RPF1, MRTO4, NOC2L, RAD51, CCDC110, CCT5, PLK4, PLK1, FANCD2, MAP2, CIRBP, CENPW	411	857	18224	2.12131	0.00392586	0.000327745	0.0148302
GOTERM_BP_DIRECT	GO:0051437~positive regulation of ubiquitin-protein ligase activity involved in regulation of mitotic cell cycle transition	11	2.38095	1.13277e-05	CCNB1, MAD2L1, PSMB1, PSMA5, PLK1, PSMB2, PSMD1, CDC23, BUB1B, CDC20, PSMA8	397	76	16792	6.12197	0.0169594	0.00155378	0.0188348
GOTERM_MF_DIRECT	GO:0003697~single-stranded DNA binding	12	2.5974	1.65742e-05	FUBP1, PRIM1, RAD51C, RPA2, CDC45, HMGB2, BLM, NEIL3, PRIM2, MCM10, YBX1, RAD51	414	93	16881	5.26134	0.00937004	0.00469605	0.0242924
GOTERM_BP_DIRECT	GO:0006260~DNA replication	15	3.24675	1.85781e-05	EXO1, BLM, NASP, CHEK1, TOPBP1, MCM2, MCM10, CDC25C, RPA2, CDC45, MCM8, RFC4, RRM2, ORC1, ORC3	397	155	16792	4.09328	0.0276633	0.00233503	0.0308884
GOTERM_BP_DIRECT	GO:0008283~cell proliferation	24	5.19481	2.08603e-05	POLR3G, STIL, DLGAP5, NASP, KIF15, TPX2, TXLNA, CDC25C, MCM10, PRDX1, TRAIP, FAM83D, KDM1A, KIF2C, CSE1L, PPP1R8, PLK1, GNB1, BUB1, BUB1B, NRDC, MELK, NUDC, USP13	397	366	16792	2.77359	0.0310084	0.00242009	0.0346823
GOTERM_CC_DIRECT	GO:0000942~condensed nuclear chromosome outer kinetochore	4	0.865801	4.44662e-05	CCNB1, PLK1, BUB1, NDC80	411	4	18224	44.3406	0.0160995	0.00124772	0.0611775
GOTERM_BP_DIRECT	GO:0034080~CENP-A containing nucleosome assembly	8	1.7316	5.95737e-05	ITGB3BP, CENPA, HJURP, KNL1, OIP5, CENPW, CENPI, CENPH	397	43	16792	7.86925	0.0860313	0.00640504	0.0990174
GOTERM_BP_DIRECT	GO:0007094~mitotic spindle assembly checkpoint	6	1.2987	8.23084e-05	MAD2L1, PLK1, BUB1, TTK, BUB1B, MAD2L2	397	20	16792	12.6892	0.116877	0.00825182	0.13678
GOTERM_BP_DIRECT	GO:0006457~protein folding	15	3.24675	9.65458e-05	TCP1, GNAI3, CWC27, PDIA6, NFYC, CCT7, P3H1, PPIE, PPIH, CCT5, CCT4, GNB1, HSPA8, NUDC, DNAJB6	397	180	16792	3.52477	0.135662	0.00907056	0.160422
GOTERM_BP_DIRECT	GO:0000086~G2/M transition of mitotic cell cycle	13	2.81385	9.82239e-05	CCNB1, PLK4, CCNB2, PLK1, NEK2, TPX2, PKMYT1, BIRC5, CHEK1, CDC25C, PLCB1, MELK, HMMR	397	137	16792	4.01361	0.137849	0.00868707	0.163208
GOTERM_CC_DIRECT	GO:0030496~midbody	12	2.5974	0.000161514	CDC42, KIF4A, CDCA8, GNAI3, PRC1, PLK1, NEK2, RAN, KATNA1, PSRC1, BIRC5, KIF20A	411	129	18224	4.12471	0.057253	0.00420238	0.222048
GOTERM_CC_DIRECT	GO:0000785~chromatin	10	2.1645	0.000175558	RPA2, HMGN2, HDAC1, PLK1, OIP5, RAN, SFPQ, CHEK1, MCM2, RAD51	411	89	18224	4.98209	0.062074	0.00426317	0.241334
GOTERM_MF_DIRECT	GO:0008017~microtubule binding	16	3.4632	0.000191858	KIFC1, KIF4A, PRC1, PSRC1, KIF15, KIF18A, NUSAP1, BIRC5, GAS2, FAM83D, PLK1, KATNA1, MAP2, SKA1, NEFM, KIF20A	414	208	16881	3.13657	0.103257	0.0356766	0.280865
GOTERM_BP_DIRECT	GO:0042176~regulation of protein catabolic process	5	1.08225	0.000252783	FAM83D, CDC42, PSMD1, HGS, FAF1	397	14	16792	15.1062	0.317334	0.020985	0.419516
GOTERM_BP_DIRECT	GO:0051436~negative regulation of ubiquitin-protein ligase activity involved in mitotic cell cycle	9	1.94805	0.000259099	CCNB1, MAD2L1, PSMB1, PSMA5, PSMB2, PSMD1, CDC23, BUB1B, CDC20	397	71	16792	5.36162	0.323816	0.0203836	0.429978
GOTERM_MF_DIRECT	GO:0005524~ATP binding	59	12.7706	0.000293213	KIFC1, RAD51C, XRCC6, PKMYT1, TTK, LATS2, MAP3K7, DDX27, KIF2C, MCM8, ORC1, TRPM6, YARS, NOL9, SARS, KIF15, TPX2, UBE2J2, MCM2, ABCC12, RAD51, RFC4, SNRNP200, BUB1B, CHORDC1, SRXN1, MELK, KIF4A, BLM, NEK2, CHEK1, TK1, KTI12, P2RY4, PARS2, KATNA1, BUB1, HSPA4, POLQ, DDX43, HSPA8, RTCA, TRIP13, ERCC6L, DHX57, TCP1, PIF1, UBE4B, KIF18A, RAD54L, AK9, ATAD1, CCT7, CCT5, PLK4, CCT4, PLK1, GRK6, KIF20A	414	1495	16881	1.60919	0.153436	0.0407872	0.428945
GOTERM_CC_DIRECT	GO:0000794~condensed nuclear chromosome	6	1.2987	0.000360622	RAD51C, NEK2, CHEK1, TOPBP1, RCC1, RAD51	411	28	18224	9.50156	0.123353	0.00819441	0.495151
GOTERM_CC_DIRECT	GO:0005876~spindle microtubule	7	1.51515	0.000428047	KIF4A, PRC1, PLK1, PSRC1, NUSAP1, BIRC5, SKA1	411	44	18224	7.05419	0.144672	0.00915027	0.587476
GOTERM_MF_DIRECT	GO:0044822~poly(A) RNA binding	47	10.1732	0.000461049	HMGB2, HMGN2, UTP18, XRCC6, SYNCRIP, STIP1, ERI3, UTP11, LIN28B, PRDX1, YBX1, SF3B2, EXOSC10, DDX27, FUBP1, PEF1, AGO1, CSDE1, RPL11, GNL2, HSPA8, RTCA, DHX57, ENO1, TCP1, YARS, CSTF2, RAN, MAGOH, NUSAP1, RPF2, ZCCHC17, RPF1, SF3A3, MRTO4, NOC2L, HEATR6, PPIE, TRNAU1AP, CCT4, SERBP1, SFPQ, SNRNP200, CIRBP, SNRNP40, KPNA2, PRPF38A	414	1129	16881	1.69747	0.23044	0.0510387	0.673702
GOTERM_BP_DIRECT	GO:0000281~mitotic cytokinesis	6	1.2987	0.000529455	KIF4A, CENPA, PLK1, NUSAP1, STMN1, KIF20A	397	29	16792	8.75115	0.550531	0.0391956	0.876783
GOTERM_BP_DIRECT	GO:0007077~mitotic nuclear envelope disassembly	7	1.51515	0.000547807	NDC1, CCNB1, CCNB2, PLK1, NUP37, NUP85, NUP107	397	44	16792	6.7291	0.562822	0.0386346	0.907044
GOTERM_BP_DIRECT	GO:1904871~positive regulation of protein localization to Cajal body	4	0.865801	0.000667382	CCT7, CCT5, TCP1, CCT4	397	8	16792	21.1486	0.635082	0.044788	1.104
GOTERM_BP_DIRECT	GO:1901796~regulation of signal transduction by p53 class mediator	11	2.38095	0.000712174	EXO1, RPA2, RFC4, TAF12, BLM, HDAC1, TPX2, CHEK1, TAF9, TOPBP1, NOC2L	397	124	16792	3.75217	0.658964	0.0456955	1.17769
GOTERM_BP_DIRECT	GO:0016032~viral process	18	3.8961	0.000768866	HTATIP2, RAN, WASF2, SYNCRIP, NUP85, RCC1, CDC25C, SF3B2, NDC1, HDAC1, PSMB1, CENPA, PSMB2, PRMT6, BUB1, NUP37, NUP107, HSPA8	397	299	16792	2.54632	0.686963	0.0472408	1.27087
GOTERM_BP_DIRECT	GO:0000398~mRNA splicing, via spliceosome	15	3.24675	0.000826835	BCAS2, CSTF2, MAGOH, CWC27, SYNCRIP, YBX1, SF3B2, SF3A3, PPIE, PPIH, DNAJC8, SNRNP200, SNRNP40, CPSF3, HSPA8	397	222	16792	2.85792	0.713219	0.0487339	1.36607
GOTERM_BP_DIRECT	GO:0000722~telomere maintenance via recombination	6	1.2987	0.000847224	PRIM1, RAD51C, RPA2, RFC4, PRIM2, RAD51	397	32	16792	7.93073	0.721921	0.0480331	1.39954
GOTERM_BP_DIRECT	GO:0007093~mitotic cell cycle checkpoint	6	1.2987	0.000847224	MAD2L1, BUB1, TTK, BUB1B, CHEK1, ZWILCH	397	32	16792	7.93073	0.721921	0.0480331	1.39954
GOTERM_CC_DIRECT	GO:0002199~zona pellucida receptor complex	4	0.865801	0.000858392	CCT7, CCT5, TCP1, CCT4	411	9	18224	19.7069	0.269077	0.017263	1.17488
GOTERM_CC_DIRECT	GO:0005832~chaperonin-containing T-complex	4	0.865801	0.000858392	CCT7, CCT5, TCP1, CCT4	411	9	18224	19.7069	0.269077	0.017263	1.17488
GOTERM_BP_DIRECT	GO:0051276~chromosome organization	5	1.08225	0.000891515	CDCA8, SFPQ, CENPW, PTTG1, RAD54L	397	19	16792	11.1308	0.739926	0.0486574	1.47219
GOTERM_BP_DIRECT	GO:1904851~positive regulation of establishment of protein localization to telomere	4	0.865801	0.0009836	CCT7, CCT5, TCP1, CCT4	397	9	16792	18.7988	0.773717	0.0516866	1.62309
GOTERM_CC_DIRECT	GO:0071013~catalytic step 2 spliceosome	9	1.94805	0.00109881	BCAS2, PPIE, CWC27, MAGOH, SNRNP200, SYNCRIP, SNRNP40, SF3A3, SF3B2	411	92	18224	4.33767	0.330541	0.0208988	1.50163
GOTERM_BP_DIRECT	GO:0075733~intracellular transport of virus	7	1.51515	0.00121692	NDC1, RAN, KPNA7, NUP37, NUP85, NUP107, KPNA2	397	51	16792	5.8055	0.84097	0.0614341	2.00445
GOTERM_BP_DIRECT	GO:0034501~protein localization to kinetochore	4	0.865801	0.00138065	KNL1, TTK, BUB1B, SPDL1	397	10	16792	16.9189	0.875844	0.0671776	2.27123
GOTERM_CC_DIRECT	GO:0000790~nuclear chromatin	13	2.81385	0.00145345	POLR3G, DPF2, KDM1A, HMGB2, HDAC1, DFFA, NASP, EME1, HAT1, RCC1, PLCB1, CDCA5, RAD51	411	193	18224	2.98667	0.411921	0.0261955	1.9818
GOTERM_MF_DIRECT	GO:0047718~indanol dehydrogenase activity	3	0.649351	0.00176234	AKR1C3, AKR1B10, AKR1C1	414	3	16881	40.7754	0.632816	0.153785	2.55246
GOTERM_BP_DIRECT	GO:0000724~double-strand break repair via homologous recombination	8	1.7316	0.00178088	RAD51C, RPA2, MCM8, BLM, SFPQ, POLQ, RAD54L, RAD51	397	74	16792	4.57267	0.932223	0.0831611	2.92052
GOTERM_BP_DIRECT	GO:0006098~pentose-phosphate shunt	4	0.865801	0.00186533	G6PD, TALDO1, PGD, TKT	397	11	16792	15.3808	0.940351	0.0843329	3.057
GOTERM_BP_DIRECT	GO:1900034~regulation of cellular response to heat	8	1.7316	0.00192523	NDC1, RPA2, NUP37, NUP85, NUP107, CHORDC1, DNAJB6, HSPA8	397	75	16792	4.5117	0.945519	0.0844029	3.1537
GOTERM_MF_DIRECT	GO:0003688~DNA replication origin binding	4	0.865801	0.00207226	CDC45, MCM2, MCM10, ORC3	414	11	16881	14.8274	0.692187	0.154919	2.99499
GOTERM_BP_DIRECT	GO:0007088~regulation of mitotic nuclear division	5	1.08225	0.00222695	CDC42, NEK2, PKMYT1, RCC1, CDC25C	397	24	16792	8.81192	0.965488	0.094269	3.63938
GOTERM_CC_DIRECT	GO:0005815~microtubule organizing center	11	2.38095	0.00246564	CDC42, KIFC1, G6PD, TRIP4, DLGAP5, KATNA1, KIF18A, BUB1B, SPDL1, LATS2, RAD51	411	153	18224	3.18789	0.593865	0.0420006	3.34036
GOTERM_BP_DIRECT	GO:0001578~microtubule bundle formation	5	1.08225	0.00260237	PRC1, PLK1, PSRC1, MAP2, KIF20A	397	25	16792	8.45945	0.980449	0.106331	4.24052
GOTERM_BP_DIRECT	GO:0051726~regulation of cell cycle	10	2.1645	0.00269505	CCNB1, E2F2, CCNB2, PLK1, CCNF, PRR11, PKMYT1, CDC25C, PLCB1, HSPA8	397	124	16792	3.41107	0.983008	0.107024	4.38838
GOTERM_CC_DIRECT	GO:0031262~Ndc80 complex	3	0.649351	0.00293998	SPC25, NUF2, NDC80	411	4	18224	33.2555	0.65859	0.0476748	3.97099
GOTERM_BP_DIRECT	GO:0046602~regulation of mitotic centrosome separation	3	0.649351	0.00322539	CEP85, NEK2, CHEK1	397	4	16792	31.7229	0.992389	0.123522	5.23033
GOTERM_BP_DIRECT	GO:0043161~proteasome-mediated ubiquitin-dependent protein catabolic process	13	2.81385	0.00325491	MAD2L1, PSMB1, PSMA5, UBE4B, PSMB2, NSFL1C, PSMD1, BUB1B, CDC23, CDC20, FAF1, PSMA8, FBXO45	397	203	16792	2.70869	0.992722	0.12151	5.27699
GOTERM_CC_DIRECT	GO:0015630~microtubule cytoskeleton	10	2.1645	0.00386059	MFN2, KIF2C, CCNB2, PRC1, PLK1, PSRC1, KIF18A, TPX2, MCM2, KNSTRN	411	137	18224	3.23654	0.756306	0.0595384	5.18406
GOTERM_BP_DIRECT	GO:0006281~DNA repair	14	3.0303	0.00394214	EXO1, RAD51C, BLM, FANCD2, PIF1, EME1, FBXO6, CHEK1, TOPBP1, PTTG1, POLQ, RAD54L, FANCA, RAD51	397	235	16792	2.51983	0.997431	0.141813	6.35716
GOTERM_CC_DIRECT	GO:0016020~membrane	69	14.9351	0.00394865	ITGB3BP, KIFC1, HTATIP2, XRCC6, PRR11, PKMYT1, SYNCRIP, TTK, TXLNA, PRIM1, KIF2C, CDC42, EDC3, PSMD1, NECAP2, RPL11, GNL2, DDOST, DHCR24, FTL, NOL9, RAN, KIF15, UBIAD1, CNOT10, NUP85, G6PD, GNB1, SEMA4F, SERBP1, SNRNP200, NUP107, STMN1, KPNA2, MELK, CALCR, KIF4A, GNAI3, LMNB1, GDAP1, PPT1, CAPZB, HMMR, EXOSC10, NDC1, P3H1, PEF1, KIAA2013, NCAPH, CSE1L, NCAPG, PSMB2, BUB1, POPDC3, HSPA8, ERCC6L, E…	411	2200	18224	1.39068	0.764044	0.0583968	5.29935
GOTERM_CC_DIRECT	GO:0005814~centriole	9	1.94805	0.00402369	CEP104, STIL, SASS6, PLK4, WRAP73, RAN, CCNF, TUBD1, BIRC5	411	113	18224	3.53155	0.770444	0.0571654	5.39748
GOTERM_BP_DIRECT	GO:0006271~DNA strand elongation involved in DNA replication	4	0.865801	0.00479576	GINS1, PRIM1, RFC4, PRIM2	397	15	16792	11.2793	0.999296	0.165961	7.68275
GOTERM_BP_DIRECT	GO:0007076~mitotic chromosome condensation	4	0.865801	0.00479576	NCAPH, NCAPG, NUSAP1, CDCA5	397	15	16792	11.2793	0.999296	0.165961	7.68275
GOTERM_BP_DIRECT	GO:1904874~positive regulation of telomerase RNA localization to Cajal body	4	0.865801	0.00479576	CCT7, CCT5, TCP1, CCT4	397	15	16792	11.2793	0.999296	0.165961	7.68275
GOTERM_MF_DIRECT	GO:0003924~GTPase activity	14	3.0303	0.00515948	GPN2, GNAI3, RAN, TUBB2A, MFN2, CDC42, GNGT1, GNB1, RAC3, TUBA3C, TUBAL3, TUBD1, GNL2, TUBA1C	414	234	16881	2.43955	0.947038	0.307378	7.30222
GOTERM_BP_DIRECT	GO:0010569~regulation of double-strand break repair via homologous recombination	4	0.865801	0.00580031	KDM1A, RPA2, CHEK1, RAD51	397	16	16792	10.5743	0.999847	0.192848	9.22012
GOTERM_BP_DIRECT	GO:0032212~positive regulation of telomere maintenance via telomerase	5	1.08225	0.00649923	CCT7, CCT5, TCP1, CCT4, NEK2	397	32	16792	6.60894	0.999947	0.208975	10.2755
GOTERM_BP_DIRECT	GO:0006409~tRNA export from nucleus	5	1.08225	0.00649923	NDC1, RAN, NUP37, NUP85, NUP107	397	32	16792	6.60894	0.999947	0.208975	10.2755
GOTERM_CC_DIRECT	GO:0070937~CRD-mediated mRNA stability complex	3	0.649351	0.00713316	CSDE1, SYNCRIP, YBX1	411	6	18224	22.1703	0.926681	0.0956126	9.38215
GOTERM_CC_DIRECT	GO:0043209~myelin sheath	10	2.1645	0.00754734	CDC42, CCT5, TCP1, GNB1, PITPNA, STIP1, TKT, PLCB1, PRDX1, HSPA8	411	152	18224	2.91715	0.937038	0.0973459	9.901
GOTERM_MF_DIRECT	GO:0019899~enzyme binding	17	3.67965	0.00823493	UBE4B, SPDL1, BIRC5, CDC20, MCM2, MCM10, PDCD2, KDM1A, UGT1A6, RPA2, RFC4, HDAC1, HOXA9, PLCB1, ZNHIT6, HSPA8, DHCR24	414	333	16881	2.08163	0.990876	0.406589	11.4153
GOTERM_BP_DIRECT	GO:0006915~apoptotic process	24	5.19481	0.00837349	ITGB3BP, DPF2, YARS, HTATIP2, PRAME, C6ORF120, DFFA, TPX2, BIRC5, GAS2, MCM2, TRAIP, NOC2L, PDCD2, MAP3K7, MFN2, CSE1L, SQSTM1, BUB1, BUB1B, FAF1, DDIAS, MELK, DHCR24	397	567	16792	1.79036	0.999997	0.25568	13.0491
GOTERM_CC_DIRECT	GO:0051233~spindle midzone	4	0.865801	0.00837962	CDC42, CDCA8, PLK1, BUB1B	411	19	18224	9.33487	0.953646	0.103892	10.9353
GOTERM_CC_DIRECT	GO:0000784~nuclear chromosome, telomeric region	9	1.94805	0.00920945	KDM1A, RPA2, PIF1, XRCC6, HAT1, MCM2, ORC1, RAD51, ORC3	411	130	18224	3.06974	0.965851	0.109925	11.9556
GOTERM_CC_DIRECT	GO:0005694~chromosome	8	1.7316	0.00956707	DDX27, KIF4A, NSFL1C, CDCA2, NUSAP1, TOPBP1, POLQ, CDCA5	411	105	18224	3.37833	0.970067	0.110379	12.3919
GOTERM_BP_DIRECT	GO:1901998~toxin transport	5	1.08225	0.00989034	CCT7, CCT5, TCP1, CCT4, TRIP4	397	36	16792	5.87462	1	0.289018	15.2346
GOTERM_BP_DIRECT	GO:0090307~mitotic spindle assembly	5	1.08225	0.00989034	KIFC1, WRAP73, NEK2, TPX2, BIRC5	397	36	16792	5.87462	1	0.289018	15.2346
GOTERM_BP_DIRECT	GO:0007017~microtubule-based process	5	1.08225	0.00989034	TUBB2A, TUBD1, TUBAL3, TUBA3C, TUBA1C	397	36	16792	5.87462	1	0.289018	15.2346
GOTERM_BP_DIRECT	GO:0042787~protein ubiquitination involved in ubiquitin-dependent protein catabolic process	10	2.1645	0.0104766	CCNB1, MAD2L1, PLK1, UBE4B, CDC23, BUB1B, CDC20, PTTG1, CUL4B, FBXO45	397	153	16792	2.76452	1	0.297707	16.0654
GOTERM_BP_DIRECT	GO:0051988~regulation of attachment of spindle microtubules to kinetochore	3	0.649351	0.0107703	CDC42, NEK2, KNSTRN	397	7	16792	18.1274	1	0.299152	16.4786
GOTERM_BP_DIRECT	GO:0043488~regulation of mRNA stability	8	1.7316	0.0110004	CALCR, PSMB1, PSMA5, SERBP1, PSMB2, PSMD1, PSMA8, HSPA8	397	103	16792	3.28522	1	0.29909	16.8011
GOTERM_CC_DIRECT	GO:0005839~proteasome core complex	4	0.865801	0.0111264	PSMB1, PSMA5, PSMB2, PSMA8	411	21	18224	8.44583	0.983158	0.12343	14.2711
GOTERM_MF_DIRECT	GO:0001758~retinal dehydrogenase activity	3	0.649351	0.0115585	AKR1C3, ALDH1A2, AKR1B10	414	7	16881	17.4752	0.998644	0.483328	15.6686
GOTERM_BP_DIRECT	GO:0000027~ribosomal large subunit assembly	4	0.865801	0.0126281	RPL11, RPF2, RPF1, MRTO4	397	21	16792	8.05662	1	0.329539	19.0491
GOTERM_BP_DIRECT	GO:0000132~establishment of mitotic spindle orientation	4	0.865801	0.0126281	CENPA, GPSM2, NDC80, SPDL1	397	21	16792	8.05662	1	0.329539	19.0491
GOTERM_CC_DIRECT	GO:0000940~condensed chromosome outer kinetochore	3	0.649351	0.012924	BUB1B, SPDL1, SKA1	411	8	18224	16.6277	0.991331	0.137892	16.3911
GOTERM_CC_DIRECT	GO:0044754~autolysosome	3	0.649351	0.012924	SQSTM1, FTH1, FTL	411	8	18224	16.6277	0.991331	0.137892	16.3911
GOTERM_BP_DIRECT	GO:0006310~DNA recombination	7	1.51515	0.0136257	EXO1, RAD51C, BLM, PIF1, XRCC6, RAD54L, RAD51	397	83	16792	3.56724	1	0.344778	20.3984
GOTERM_MF_DIRECT	GO:0004298~threonine-type endopeptidase activity	4	0.865801	0.0139376	PSMB1, PSMA5, PSMB2, PSMA8	414	21	16881	7.76674	0.999655	0.515555	18.5956
GOTERM_BP_DIRECT	GO:0044597~daunorubicin metabolic process	3	0.649351	0.0141379	AKR1C3, AKR1B10, AKR1C1	397	8	16792	15.8615	1	0.349499	21.083
GOTERM_BP_DIRECT	GO:0044598~doxorubicin metabolic process	3	0.649351	0.0141379	AKR1C3, AKR1B10, AKR1C1	397	8	16792	15.8615	1	0.349499	21.083
GOTERM_CC_DIRECT	GO:0005680~anaphase-promoting complex	4	0.865801	0.0143336	CDC23, BUB1B, CDC20, MAD2L2	411	23	18224	7.71141	0.994854	0.147588	18.0194
GOTERM_CC_DIRECT	GO:0031965~nuclear membrane	12	2.5974	0.0148891	NDC1, TMEM201, LMNB1, NUP85, NUP107, RCC1, PLCB1, YBX1, AK9, GTF3C3, MRTO4, PRPF38A	411	229	18224	2.32353	0.995811	0.148743	18.653
GOTERM_BP_DIRECT	GO:0031047~gene silencing by RNA	8	1.7316	0.0160974	NDC1, RAN, HENMT1, CNOT10, AGO1, NUP37, NUP85, NUP107	397	111	16792	3.04845	1	0.381518	23.6512
GOTERM_MF_DIRECT	GO:0003723~RNA binding	23	4.97835	0.016136	CSTF2, OOEP, NOL9, HENMT1, SARS, SYNCRIP, RCAN3, LIN28B, YBX1, RPF1, SF3A3, FUBP1, PPIE, PPP1R8, PARS2, ZNF239, AGO1, CIRBP, RBMXL1, RPL11, CPSF3, RTCA, DDX43	414	547	16881	1.7145	0.999903	0.536986	21.2157
GOTERM_BP_DIRECT	GO:0051439~regulation of ubiquitin-protein ligase activity involved in mitotic cell cycle	4	0.865801	0.0162429	CCNB1, PLK1, CDC23, CDC20	397	23	16792	7.35604	1	0.378451	23.8386
GOTERM_CC_DIRECT	GO:0005664~nuclear origin of replication recognition complex	3	0.649351	0.0163713	MCM2, ORC1, ORC3	411	9	18224	14.7802	0.997582	0.15814	20.3213
GOTERM_BP_DIRECT	GO:0006986~response to unfolded protein	5	1.08225	0.0168361	MFN2, FBXO6, HSPA4, UBE2J2, HSPA8	397	42	16792	5.03538	1	0.383536	24.5988
GOTERM_MF_DIRECT	GO:0004386~helicase activity	7	1.51515	0.0178798	DDX27, MCM8, BLM, SNRNP200, RAD54L, DHX57, ERCC6L	414	85	16881	3.35797	0.999965	0.545374	23.2381
GOTERM_BP_DIRECT	GO:0008608~attachment of spindle microtubules to kinetochore	3	0.649351	0.0178963	KNL1, SGO1, NDC80	397	9	16792	14.0991	1	0.396474	25.9395
GOTERM_CC_DIRECT	GO:0071011~precatalytic spliceosome	4	0.865801	0.0180109	BCAS2, SNRNP40, PRPF38A, SF3B2	411	25	18224	7.0945	0.998685	0.168293	22.1298
GOTERM_MF_DIRECT	GO:0005200~structural constituent of cytoskeleton	8	1.7316	0.0184395	EPB41, TUBB2A, TUBD1, TUBAL3, TUBA3C, NDC80, NEFM, TUBA1C	414	110	16881	2.96548	0.999974	0.530037	23.8768
GOTERM_MF_DIRECT	GO:0003684~damaged DNA binding	6	1.2987	0.0188514	RPA2, HMGB2, NEIL3, XRCC6, CUL4B, POLQ	414	63	16881	3.88337	0.99998	0.513565	24.3437
GOTERM_CC_DIRECT	GO:0005681~spliceosomal complex	7	1.51515	0.0193882	BCAS2, PPIH, PPP1R8, SNRNP200, HSPA8, SF3A3, SF3B2	411	94	18224	3.30196	0.999212	0.175634	23.6195
GOTERM_BP_DIRECT	GO:0032508~DNA duplex unwinding	5	1.08225	0.0196868	GINS1, CDC45, BLM, PIF1, XRCC6	397	44	16792	4.8065	1	0.42067	28.153
GOTERM_CC_DIRECT	GO:0031080~nuclear pore outer ring	3	0.649351	0.0201626	NUP37, NUP85, NUP107	411	10	18224	13.3022	0.99941	0.177697	24.4455
GOTERM_BP_DIRECT	GO:0007019~microtubule depolymerization	3	0.649351	0.0220252	KIF2C, KIF18A, STMN1	397	10	16792	12.6892	1	0.451481	30.9504
GOTERM_BP_DIRECT	GO:0006259~DNA metabolic process	4	0.865801	0.0226425	RAN, TOPBP1, KPNA2, TK1	397	26	16792	6.50727	1	0.454865	31.6715
GOTERM_BP_DIRECT	GO:0000732~strand displacement	4	0.865801	0.0226425	EXO1, RAD51C, BLM, RAD51	397	26	16792	6.50727	1	0.454865	31.6715
GOTERM_CC_DIRECT	GO:0005643~nuclear pore	6	1.2987	0.0230094	NDC1, MAD2L1, RAN, KPNA7, NUP107, KPNA2	411	72	18224	3.69505	0.999796	0.195763	27.4111
GOTERM_MF_DIRECT	GO:0043142~single-stranded DNA-dependent ATPase activity	3	0.649351	0.0235958	RFC4, POLQ, RAD51	414	10	16881	12.2326	0.999999	0.571597	29.5328
GOTERM_MF_DIRECT	GO:0008199~ferric iron binding	3	0.649351	0.0235958	TF, FTH1, FTL	414	10	16881	12.2326	0.999999	0.571597	29.5328
GOTERM_BP_DIRECT	GO:0098609~cell-cell adhesion	13	2.81385	0.0276334	RAN, WASF2, CAPZA1, LYPLA2, SFN, PRDX1, CAPZB, CCNB2, SERBP1, KIAA1524, HSPA8, NUDC, ENO1	397	271	16792	2.02902	1	0.517873	37.2478
GOTERM_BP_DIRECT	GO:0036297~interstrand cross-link repair	5	1.08225	0.0280533	RPA2, FANCD2, EME1, FANCA, RAD51	397	49	16792	4.31604	1	0.517241	37.6969
GOTERM_MF_DIRECT	GO:0042802~identical protein binding	28	6.06061	0.0290038	NMI, PRC1, SRM, SFN, MCM10, PRDX1, TK1, CDC42, HJURP, SQSTM1, EDC3, GPSM2, GALE, TRIP13, FTL, FN1, IK, NDC80, BIRC5, TOPBP1, EIF2B1, RAD51, CCT7, PLK4, MAD2L1, G6PD, SNRNP200, ZNHIT6	414	749	16881	1.52431	1	0.625963	35.0426
GOTERM_BP_DIRECT	GO:0000209~protein polyubiquitination	10	2.1645	0.0306903	PSMB1, ZNF738, PSMA5, TRIM6, UBE4B, PSMB2, PSMD1, FBXO6, UBE2J2, PSMA8	397	184	16792	2.29876	1	0.54364	40.4489
GOTERM_CC_DIRECT	GO:0005871~kinesin complex	5	1.08225	0.031132	KIFC1, KIF2C, KIF4A, KIF18A, KIF20A	411	53	18224	4.18308	0.99999	0.250685	35.2899
GOTERM_BP_DIRECT	GO:0051310~metaphase plate congression	3	0.649351	0.0313175	FAM83D, KIF2C, NDC80	397	12	16792	10.5743	1	0.54508	41.0864
GOTERM_BP_DIRECT	GO:0051382~kinetochore assembly	3	0.649351	0.0313175	CENPA, CENPW, CENPH	397	12	16792	10.5743	1	0.54508	41.0864
GOTERM_BP_DIRECT	GO:0042574~retinal metabolic process	3	0.649351	0.0313175	AKR1C3, ALDH1A2, AKR1C1	397	12	16792	10.5743	1	0.54508	41.0864
GOTERM_BP_DIRECT	GO:0006521~regulation of cellular amino acid metabolic process	5	1.08225	0.0319086	PSMB1, PSMA5, PSMB2, PSMD1, PSMA8	397	51	16792	4.14679	1	0.546063	41.6814
GOTERM_CC_DIRECT	GO:0030529~intracellular ribonucleoprotein complex	8	1.7316	0.0342588	SNRNP200, AGO1, RBMXL1, SYNCRIP, CPSF3, ZCCHC17, YBX1, HSPA8	411	136	18224	2.60827	0.999997	0.266798	38.1054
GOTERM_BP_DIRECT	GO:0030036~actin cytoskeleton organization	8	1.7316	0.0344664	CDC42, EPB41, RAC3, RAN, WASF2, CAP1, CAPZB, DNAJB6	397	130	16792	2.60291	1	0.568579	44.1914
GOTERM_BP_DIRECT	GO:0000460~maturation of 5.8S rRNA	3	0.649351	0.036444	EXOSC10, NOL9, RPF1	397	13	16792	9.7609	1	0.583517	46.062
GOTERM_BP_DIRECT	GO:0000956~nuclear-transcribed mRNA catabolic process	3	0.649351	0.036444	EXOSC10, AGO1, MRTO4	397	13	16792	9.7609	1	0.583517	46.062
GOTERM_BP_DIRECT	GO:0002223~stimulatory C-type lectin receptor signaling pathway	7	1.51515	0.0379893	MAP3K7, NRAS, PSMB1, PSMA5, PSMB2, PSMD1, PSMA8	397	105	16792	2.81982	1	0.593317	47.4826
GOTERM_CC_DIRECT	GO:0005847~mRNA cleavage and polyadenylation specificity factor complex	3	0.649351	0.0384343	CSTF2, CPSF3, SSU72	411	14	18224	9.50156	0.999999	0.288657	41.6884
GOTERM_BP_DIRECT	GO:0000380~alternative mRNA splicing, via spliceosome	3	0.649351	0.0418672	KDM1A, SFPQ, CELF4	397	14	16792	9.06369	1	0.624126	50.8942
GOTERM_BP_DIRECT	GO:0010827~regulation of glucose transport	4	0.865801	0.0421389	NDC1, NUP37, NUP85, NUP107	397	33	16792	5.12694	1	0.621026	51.1252
GOTERM_MF_DIRECT	GO:0043130~ubiquitin binding	6	1.2987	0.0422498	SQSTM1, NSFL1C, KIF18A, FAF1, UBTD2, USP13	414	78	16881	3.13657	1	0.743903	46.8886
GOTERM_BP_DIRECT	GO:0007018~microtubule-based movement	6	1.2987	0.0424621	KIFC1, KIF2C, KIF4A, KIF15, KIF18A, KIF20A	397	81	16792	3.13313	1	0.61845	51.3987
GOTERM_MF_DIRECT	GO:0003677~DNA binding	53	11.4719	0.0427447	ZNF85, E2F2, RAD51C, HMGN2, XRCC6, YBX1, PDCD2, ZNF14, MCM8, ZNF738, PRIM2, ZNF681, ORC1, ZNF43, ZNF441, KIF15, GMEB1, ZNF791, NUSAP1, TOPBP1, MCM2, RAD51, ZNF883, RFC4, TAF12, ZNF239, HMGB2, KIF4A, ZFP64, BLM, NFYC, ZBTB17, LIN28B, MLF1, TCEA3, HJURP, CENPA, CSDE1, GTF3C6, TAF9, POLQ, ZNF700, TCF24, GTF3C3, ENO1, ERCC6L, EXO1, ZMYM1, EME1, RAD54L, PPP1R8, CENPW, DNAJB6	414	1674	16881	1.29098	1	0.729086	47.2895
GOTERM_BP_DIRECT	GO:0008380~RNA splicing	9	1.94805	0.0433386	BCAS2, PPP1R8, SFPQ, RBMXL1, SYNCRIP, SNRNP40, SF3A3, PRPF38A, SF3B2	397	166	16792	2.29322	1	0.620762	52.1332
GOTERM_CC_DIRECT	GO:0031261~DNA replication preinitiation complex	2	0.4329	0.0444907	CDC45, ORC3	411	2	18224	44.3406	1	0.320442	46.5446
GOTERM_CC_DIRECT	GO:0005656~nuclear pre-replicative complex	2	0.4329	0.0444907	CDC45, ORC3	411	2	18224	44.3406	1	0.320442	46.5446
GOTERM_CC_DIRECT	GO:1990077~primosome complex	2	0.4329	0.0444907	PRIM1, PRIM2	411	2	18224	44.3406	1	0.320442	46.5446
GOTERM_CC_DIRECT	GO:0008043~intracellular ferritin complex	2	0.4329	0.0444907	FTH1, FTL	411	2	18224	44.3406	1	0.320442	46.5446
GOTERM_MF_DIRECT	GO:0000400~four-way junction DNA binding	3	0.649351	0.0447497	RAD51C, HMGB2, RAD51	414	14	16881	8.73758	1	0.727524	48.8849
GOTERM_MF_DIRECT	GO:0003777~microtubule motor activity	6	1.2987	0.0462814	KIFC1, KIF2C, KIF4A, KIF15, KIF18A, KIF20A	414	80	16881	3.05815	1	0.722433	50.0733
GOTERM_BP_DIRECT	GO:0016488~farnesol catabolic process	2	0.4329	0.0466105	AKR1C3, AKR1B10	397	2	16792	42.2972	1	0.642866	54.784
GOTERM_BP_DIRECT	GO:0009051~pentose-phosphate shunt, oxidative branch	2	0.4329	0.0466105	G6PD, PGD	397	2	16792	42.2972	1	0.642866	54.784
GOTERM_BP_DIRECT	GO:0006267~pre-replicative complex assembly involved in nuclear cell cycle DNA replication	2	0.4329	0.0466105	CDC45, ORC3	397	2	16792	42.2972	1	0.642866	54.784
GOTERM_BP_DIRECT	GO:0005999~xylulose biosynthetic process	2	0.4329	0.0466105	TALDO1, TKT	397	2	16792	42.2972	1	0.642866	54.784
GOTERM_BP_DIRECT	GO:0019322~pentose biosynthetic process	2	0.4329	0.0466105	G6PD, PGD	397	2	16792	42.2972	1	0.642866	54.784
GOTERM_BP_DIRECT	GO:0048026~positive regulation of mRNA splicing, via spliceosome	3	0.649351	0.0475705	HMX2, CELF4, HSPA8	397	15	16792	8.45945	1	0.64533	55.5351
GOTERM_BP_DIRECT	GO:0006606~protein import into nucleus	5	1.08225	0.0477376	CSE1L, RAN, NUP85, NUP107, KPNA2	397	58	16792	3.64631	1	0.641508	55.6647
GOTERM_MF_DIRECT	GO:0045550~geranylgeranyl reductase activity	2	0.4329	0.0483336	AKR1C3, AKR1B10	414	2	16881	40.7754	1	0.721699	51.6251
GOTERM_MF_DIRECT	GO:0003690~double-stranded DNA binding	6	1.2987	0.0483801	RAD51C, HMGB2, NEIL3, XRCC6, YBX1, RAD51	414	81	16881	3.0204	1	0.706139	51.6597
GOTERM_BP_DIRECT	GO:0007339~binding of sperm to zona pellucida	4	0.865801	0.0488551	CCT7, CCT5, TCP1, CCT4	397	35	16792	4.83397	1	0.645159	56.5219
GOTERM_BP_DIRECT	GO:0006284~base-excision repair	4	0.865801	0.0488551	RPA2, NEIL3, PRMT6, POLQ	397	35	16792	4.83397	1	0.645159	56.5219
GOTERM_BP_DIRECT	GO:0000731~DNA synthesis involved in DNA repair	4	0.865801	0.0488551	EXO1, RAD51C, BLM, RAD51	397	35	16792	4.83397	1	0.645159	56.5219
GOTERM_MF_DIRECT	GO:0004033~aldo-keto reductase (NADP) activity	3	0.649351	0.0508167	AKR1C3, AKR1B10, AKR1C1	414	15	16881	8.15507	1	0.708961	53.4427
GOTERM_MF_DIRECT	GO:0051082~unfolded protein binding	7	1.51515	0.0531546	CCT7, CCT5, TCP1, CCT4, DNAJB6, NUDC, HSPA8	414	110	16881	2.5948	1	0.710892	55.0956
GOTERM_CC_DIRECT	GO:0044297~cell body	5	1.08225	0.0533134	CCT7, CCT5, TCP1, CCT4, GNB1	411	63	18224	3.5191	1	0.365225	52.9513
GOTERM_BP_DIRECT	GO:0007051~spindle organization	3	0.649351	0.0535377	TTK, KNSTRN, AUNIP	397	16	16792	7.93073	1	0.674629	59.9476
GOTERM_MF_DIRECT	GO:0098641~cadherin binding involved in cell-cell adhesion	13	2.81385	0.0538672	RAN, WASF2, CAPZA1, LYPLA2, SFN, PRDX1, CAPZB, CCNB2, SERBP1, KIAA1524, HSPA8, NUDC, ENO1	414	290	16881	1.82786	1	0.701705	55.5885
GOTERM_CC_DIRECT	GO:0005657~replication fork	3	0.649351	0.0549676	RAD51C, PIF1, CHEK1	411	17	18224	7.82482	1	0.367813	54.0701
GOTERM_BP_DIRECT	GO:0016925~protein sumoylation	7	1.51515	0.0586951	NDC1, CDCA8, BLM, NUP37, NUP85, BIRC5, NUP107	397	117	16792	2.5306	1	0.704128	63.4263
GOTERM_BP_DIRECT	GO:0002479~antigen processing and presentation of exogenous peptide antigen via MHC class I, TAP-dependent	5	1.08225	0.0612662	PSMB1, PSMA5, PSMB2, PSMD1, PSMA8	397	63	16792	3.35692	1	0.715251	65.0525
GOTERM_CC_DIRECT	GO:0005913~cell-cell adherens junction	13	2.81385	0.0619299	RAN, WASF2, CAPZA1, LYPLA2, SFN, PRDX1, CAPZB, CCNB2, SERBP1, KIAA1524, HSPA8, NUDC, ENO1	411	323	18224	1.78461	1	0.397866	58.5142
GOTERM_MF_DIRECT	GO:0003743~translation initiation factor activity	5	1.08225	0.0620164	AGO1, EIF3I, EIF2B1, EIF3M, EIF2B5	414	61	16881	3.34224	1	0.739942	60.8776
GOTERM_BP_DIRECT	GO:0007223~Wnt signaling pathway, calcium modulating pathway	4	0.865801	0.0637387	MAP3K7, GNB1, AGO1, PLCB1	397	39	16792	4.33818	1	0.725157	66.552
GOTERM_BP_DIRECT	GO:0000079~regulation of cyclin-dependent protein serine/threonine kinase activity	4	0.865801	0.0637387	BLM, PKMYT1, SFN, CDC25C	397	39	16792	4.33818	1	0.725157	66.552
GOTERM_BP_DIRECT	GO:0045089~positive regulation of innate immune response	3	0.649351	0.0662021	COCH, POLR3G, HMGB2	397	18	16792	7.04954	1	0.734462	67.9857
GOTERM_BP_DIRECT	GO:0060071~Wnt signaling pathway, planar cell polarity pathway	6	1.2987	0.0664132	CDC42, PSMB1, PSMA5, PSMB2, PSMD1, PSMA8	397	92	16792	2.75851	1	0.731132	68.1059
GOTERM_CC_DIRECT	GO:0016363~nuclear matrix	6	1.2987	0.0678698	KIF4A, BLM, LMNB1, SFPQ, HAT1, CENPW	411	97	18224	2.74272	1	0.420629	61.9868
GOTERM_BP_DIRECT	GO:0055114~oxidation-reduction process	21	4.54545	0.0681837	C5ORF63, ME1, HTATIP2, PGD, OSGIN2, PRDX1, FTH1, AKR1C3, P3H1, KDM1A, ALDH1A2, AKR1B15, G6PD, PLOD1, UQCRH, RRM2, AKR1B10, AOC1, SRXN1, AKR1C1, DHCR24	397	592	16792	1.50041	1	0.7363	69.0969
GOTERM_CC_DIRECT	GO:0005635~nuclear envelope	8	1.7316	0.0682994	NDC1, HTATIP2, CSE1L, LMNB1, NUP37, NUP85, FAF1, NUP107	411	159	18224	2.23098	1	0.416054	62.2272
GOTERM_BP_DIRECT	GO:0071173~spindle assembly checkpoint	2	0.4329	0.0690967	KNL1, BUB1	397	3	16792	28.1982	1	0.736779	69.5965
GOTERM_BP_DIRECT	GO:1904667~negative regulation of ubiquitin protein ligase activity	2	0.4329	0.0690967	MAD2L1, MAD2L2	397	3	16792	28.1982	1	0.736779	69.5965
GOTERM_BP_DIRECT	GO:2000348~regulation of CD40 signaling pathway	2	0.4329	0.0690967	FANCD2, FANCA	397	3	16792	28.1982	1	0.736779	69.5965
GOTERM_BP_DIRECT	GO:0038061~NIK/NF-kappaB signaling	5	1.08225	0.0702555	PSMB1, PSMA5, PSMB2, PSMD1, PSMA8	397	66	16792	3.20434	1	0.738526	70.2198
GOTERM_BP_DIRECT	GO:0006302~double-strand break repair	5	1.08225	0.0702555	EME1, POLQ, MAD2L2, CDCA5, TRIP13	397	66	16792	3.20434	1	0.738526	70.2198
GOTERM_BP_DIRECT	GO:0008584~male gonad development	6	1.2987	0.0714349	AKR1C3, HMGB2, NASP, CSDE1, HOXA9, FANCA	397	94	16792	2.69982	1	0.740333	70.8418
GOTERM_MF_DIRECT	GO:0047086~ketosteroid monooxygenase activity	2	0.4329	0.0716192	AKR1C3, AKR1C1	414	3	16881	27.1836	1	0.778537	66.3554
GOTERM_MF_DIRECT	GO:0016765~transferase activity, transferring alkyl or aryl (other than methyl) groups	2	0.4329	0.0716192	DHDDS, UBIAD1	414	3	16881	27.1836	1	0.778537	66.3554
GOTERM_BP_DIRECT	GO:0042276~error-prone translesion synthesis	3	0.649351	0.0728699	RPA2, RFC4, MAD2L2	397	19	16792	6.67851	1	0.743366	71.5821
GOTERM_BP_DIRECT	GO:0007283~spermatogenesis	15	3.24675	0.0738064	TSPY2, RAD51C, KIFC1, HMGB2, SPATA31D1, PTTG1, CDC25C, GTSF1, NDC1, CCNB1, KIAA1524, CNR1, TUBD1, HOXA9, TRIP13	397	385	16792	1.64794	1	0.743866	72.0557
GOTERM_CC_DIRECT	GO:0005623~cell	6	1.2987	0.0751996	CALCR, HMGB2, XCL1, PRDX1, FTH1, FTL	411	100	18224	2.66044	1	0.441411	65.9004
GOTERM_BP_DIRECT	GO:0043154~negative regulation of cysteine-type endopeptidase activity involved in apoptotic process	5	1.08225	0.0798813	BIRC5, SFN, DNAJB6, MAGEA3, DHCR24	397	69	16792	3.06502	1	0.768172	74.9522
GOTERM_CC_DIRECT	GO:0000781~chromosome, telomeric region	4	0.865801	0.0844864	RPA2, BLM, HAT1, CHEK1	411	46	18224	3.85571	1	0.475008	70.3225
GOTERM_BP_DIRECT	GO:0071480~cellular response to gamma radiation	3	0.649351	0.0868075	KDM1A, XRCC6, RAD51	397	21	16792	6.04246	1	0.793221	77.9097
GOTERM_BP_DIRECT	GO:0006406~mRNA export from nucleus	6	1.2987	0.0877086	NDC1, MAGOH, NUP37, NUP85, NUP107, CPSF3	397	100	16792	2.53783	1	0.79302	78.2694
GOTERM_BP_DIRECT	GO:0031175~neuron projection development	6	1.2987	0.0877086	RAC3, MAP2, UBE4B, STMN1, CUL4B, CAPZB	397	100	16792	2.53783	1	0.79302	78.2694
GOTERM_MF_DIRECT	GO:0005525~GTP binding	15	3.24675	0.0902038	GPN2, GNAI3, TUBB2A, RAN, TPX2, MFN2, CDC42, NRAS, RAC3, TUBD1, TUBA3C, TUBAL3, GNL2, FPGT, TUBA1C	414	384	16881	1.59279	1	0.84301	74.9859
GOTERM_BP_DIRECT	GO:0007091~metaphase/anaphase transition of mitotic cell cycle	2	0.4329	0.0910538	CDC23, BUB1B	397	4	16792	21.1486	1	0.802054	79.5571
GOTERM_BP_DIRECT	GO:0090666~scaRNA localization to Cajal body	2	0.4329	0.0910538	TCP1, CCT4	397	4	16792	21.1486	1	0.802054	79.5571
GOTERM_BP_DIRECT	GO:0045589~regulation of regulatory T cell differentiation	2	0.4329	0.0910538	FANCD2, FANCA	397	4	16792	21.1486	1	0.802054	79.5571
GOTERM_BP_DIRECT	GO:0002084~protein depalmitoylation	2	0.4329	0.0910538	LYPLA2, PPT1	397	4	16792	21.1486	1	0.802054	79.5571
GOTERM_BP_DIRECT	GO:0070192~chromosome organization involved in meiotic cell cycle	2	0.4329	0.0910538	RAD51C, RAD51	397	4	16792	21.1486	1	0.802054	79.5571
GOTERM_BP_DIRECT	GO:0016321~female meiosis chromosome segregation	2	0.4329	0.0910538	PLK1, TTK	397	4	16792	21.1486	1	0.802054	79.5571
GOTERM_BP_DIRECT	GO:0031577~spindle checkpoint	2	0.4329	0.0910538	BIRC5, SPDL1	397	4	16792	21.1486	1	0.802054	79.5571
GOTERM_BP_DIRECT	GO:0001667~ameboidal-type cell migration	2	0.4329	0.0910538	WASF2, CAP1	397	4	16792	21.1486	1	0.802054	79.5571
GOTERM_BP_DIRECT	GO:0035246~peptidyl-arginine N-methylation	2	0.4329	0.0910538	HENMT1, WDR77	397	4	16792	21.1486	1	0.802054	79.5571
GOTERM_BP_DIRECT	GO:0071395~cellular response to jasmonic acid stimulus	2	0.4329	0.0910538	AKR1C3, AKR1C1	397	4	16792	21.1486	1	0.802054	79.5571
GOTERM_BP_DIRECT	GO:0072757~cellular response to camptothecin	2	0.4329	0.0910538	BLM, RAD51	397	4	16792	21.1486	1	0.802054	79.5571
GOTERM_BP_DIRECT	GO:0090090~negative regulation of canonical Wnt signaling pathway	8	1.7316	0.0915731	PSMB1, HDAC1, PSMA5, PSMB2, PSMD1, MAD2L2, PSMA8, LATS2	397	163	16792	2.07594	1	0.800382	79.7504
GOTERM_MF_DIRECT	GO:0017056~structural constituent of nuclear pore	3	0.649351	0.0924205	NDC1, NUP85, NUP107	414	21	16881	5.82505	1	0.840553	75.8646
GOTERM_BP_DIRECT	GO:0051443~positive regulation of ubiquitin-protein transferase activity	3	0.649351	0.0940512	PLK1, DCUN1D5, MAGEC2	397	22	16792	5.7678	1	0.80582	80.6497
GOTERM_BP_DIRECT	GO:1900087~positive regulation of G1/S transition of mitotic cell cycle	3	0.649351	0.0940512	CDC45, CUL4B, PLCB1	397	22	16792	5.7678	1	0.80582	80.6497
GOTERM_MF_DIRECT	GO:0018636~phenanthrene 9,10-monooxygenase activity	2	0.4329	0.0943365	AKR1C3, AKR1C1	414	4	16881	20.3877	1	0.83725	76.6008
GOTERM_MF_DIRECT	GO:0047115~trans-1,2-dihydrobenzene-1,2-diol dehydrogenase activity	2	0.4329	0.0943365	AKR1C3, AKR1C1	414	4	16881	20.3877	1	0.83725	76.6008
GOTERM_MF_DIRECT	GO:0043515~kinetochore binding	2	0.4329	0.0943365	SPDL1, CENPH	414	4	16881	20.3877	1	0.83725	76.6008

## Sheet: Table SIV
Table SIV. Results of enriched metabolic pathways by differentially expressed genes.
Category	Term	Count	%	PValue	Genes	List Total	Pop Hits	Pop Total	Fold Enrichment	Bonferroni	Benjamini	FDR
KEGG_PATHWAY	hsa04110:Cell cycle	22	4.7619	1.72596e-12	E2F2, PKMYT1, TTK, CDC23, CHEK1, CDC20, PTTG1, SFN, MCM2, CDC25C, ZBTB17, CCNB1, CDC45, MAD2L1, CCNB2, HDAC1, PLK1, BUB1, BUB1B, MAD2L2, ORC1, ORC3	171	124	6879	7.13724	3.48642e-10	3.48642e-10	2.16682e-09
KEGG_PATHWAY	hsa04114:Oocyte meiosis	12	2.5974	8.45919e-05	CCNB1, MAD2L1, CCNB2, PLK1, SGO1, BUB1, PKMYT1, CDC23, CDC20, PTTG1, CDC25C, MAD2L2	171	111	6879	4.34898	0.0169431	0.00850774	0.106148
KEGG_PATHWAY	hsa04914:Progesterone-mediated oocyte maturation	10	2.1645	0.000272903	CCNB1, GNAI3, MAD2L1, CCNB2, PLK1, BUB1, PKMYT1, CDC23, CDC25C, MAD2L2	171	87	6879	4.62392	0.0536416	0.0182101	0.342073
KEGG_PATHWAY	hsa03440:Homologous recombination	6	1.2987	0.000637814	RAD51C, RPA2, BLM, EME1, RAD54L, RAD51	171	29	6879	8.32305	0.12092	0.0317063	0.797792
KEGG_PATHWAY	hsa03040:Spliceosome	11	2.38095	0.00160393	BCAS2, PPIE, PPIH, MAGOH, SNRNP200, RBMXL1, SNRNP40, HSPA8, SF3A3, PRPF38A, SF3B2	171	133	6879	3.32713	0.276934	0.0627927	1.99508
KEGG_PATHWAY	hsa03460:Fanconi anemia pathway	7	1.51515	0.00182889	RAD51C, RPA2, BLM, FANCD2, EME1, FANCA, RAD51	171	53	6879	5.31314	0.309109	0.0597682	2.27195
KEGG_PATHWAY	hsa03030:DNA replication	5	1.08225	0.0114514	PRIM1, RPA2, RFC4, PRIM2, MCM2	171	36	6879	5.58723	0.902365	0.282771	13.4627
KEGG_PATHWAY	hsa04540:Gap junction	7	1.51515	0.0213181	NRAS, GNAI3, TUBB2A, TUBAL3, TUBA3C, PLCB1, TUBA1C	171	88	6879	3.19996	0.98713	0.419638	23.7025
KEGG_PATHWAY	hsa03050:Proteasome	5	1.08225	0.0226752	PSMB1, PSMA5, PSMB2, PSMD1, PSMA8	171	44	6879	4.57137	0.990276	0.402374	25.0201
KEGG_PATHWAY	hsa00030:Pentose phosphate pathway	4	0.865801	0.0338457	G6PD, TALDO1, PGD, TKT	171	29	6879	5.5487	0.999046	0.501186	35.0965
KEGG_PATHWAY	hsa05130:Pathogenic Escherichia coli infection	5	1.08225	0.0365847	CDC42, TUBB2A, TUBAL3, TUBA3C, TUBA1C	171	51	6879	3.94393	0.999463	0.49562	37.369
KEGG_PATHWAY	hsa03013:RNA transport	9	1.94805	0.0628976	NDC1, RAN, MAGOH, NUP37, NUP85, EIF3I, NUP107, EIF2B1, EIF2B5	171	172	6879	2.10496	0.999998	0.664971	55.7612
KEGG_PATHWAY	hsa04115:p53 signaling pathway	5	1.08225	0.0832807	CCNB1, CCNB2, RRM2, CHEK1, SFN	171	67	6879	3.00209	1	0.741053	66.4339
KEGG_PATHWAY	hsa04978:Mineral absorption	4	0.865801	0.0941548	TF, TRPM6, FTH1, FTL	171	44	6879	3.6571	1	0.759923	71.1039
